# Supplementary material for: A BOILED‐Egg To Predict Gastrointestinal Absorption and Brain Penetration of Small Molecules
Source: PubMed Central journal article supplement — ChemMedChem. 2016 May 24;11(11):1117–21. doi: 10.1002/cmdc.201600182 (PMC5089604; doi:10.1002/cmdc.201600182), 2016-05-24
Supplement: CMDC-11-1117-s001.pdf [file CMDC-11-1117-s001.pdf]

## Supporting Information

### **A BOILED-Egg To Predict Gastrointestinal Absorption and Brain Penetration of Small Molecules**

Antoine Daina and Vincent Zoete\*<sup>[a]</sup>

cmdc\_201600182\_sm\_miscellaneous\_information.pdf  
cmdc\_201600182\_sm\_Supporting\_DataS3.xlsx

## **Supporting Information**

### Table of Content

|    |                       |    |
|----|-----------------------|----|
| 1. | Table of content      | 1  |
| 2. | Methods               | 2  |
| 3. | Supporting tables     | 11 |
| 4. | Supporting data       | 24 |
| 5. | Supporting figures    | 27 |
| 6. | Supporting references | 37 |

**Methods S1. Construction of the HIA-dataset.** Data quality is of primary importance to assure significant predictive power of the model. Particular care was given to retrieve the most relevant and up-to-date information on passive gastrointestinal absorption and BBB permeation. We processed and cured the data published by Newby and colleagues,<sup>[1]</sup> who collected abundant and well-documented information related to human gastrointestinal absorption of small molecules as follow. For our purpose, measurements performed on prodrugs, salts or molecules without polar atoms were excluded. We performed additional curation by removing entries showing important variability or conflicting FA values. Moreover, compounds for which active transport was seriously suspected were withdrawn. Publicly available databases, both specialized (Metabase,<sup>[2]</sup> UCSF-FDA TransPortal,<sup>[3]</sup> TSdb<sup>[4]</sup>) and more generalist (DrugBank,<sup>[5]</sup> ChEMBL<sup>[1,6]</sup>), were thoroughly queried to detect potential active transporters. Also, literature information on kinetics of absorption was searched to detect slow or saturable rates, which could stem from active transport. The SMILES description<sup>[2,7]</sup> of all 660 molecules remaining after filtering were visually checked and corrected if necessary. Finally, the chemical structures were neutralized, aromatized and all stereochemistry notations removed by using the Standardizer program (version 14.9.29.0, 2014, <http://www.chemaxon.com>). The commonly accepted threshold of 30% FA was applied to discriminate 567 well-absorbed (HIA+) from 93 poorly absorbed (HIA-) molecules. The final HIA-dataset is given in Table S1.

**Methods S2. Construction of BBB-dataset.** We processed and cured the data published by Brito-Sanchez and colleagues,<sup>[3,8]</sup> who collected abundant and well-documented information related to human brain access for small molecules as follow. For our purpose, measurements performed on prodrugs, salts or molecules without polar atoms were excluded. We performed additional curation by removing entries showing important variability or conflicting blood-brain partition ( $\log BB$ ) values. Moreover, compounds for which active transport or efflux was seriously suspected were withdrawn. Publicly available databases, both specialized (Metabase,<sup>[2,4]</sup> UCSF-FDA TransPortal,<sup>[3,5]</sup> TSdb<sup>[4]</sup>) and more generalist (DrugBank,<sup>[5]</sup> ChEMBL<sup>[6]</sup>), were thoroughly queried to detect potential active transporters. The SMILES description<sup>[7]</sup> of all 260 molecules remaining after filtering were visually checked and corrected if necessary. Finally, the chemical structures were neutralized, aromatized and all stereochemistry notations removed by using the Standardizer program (version 14.9.29.0, 2014, <http://www.chemaxon.com>). A threshold of  $\log BB = 0$  was applied to discriminate 156 permeant (BBB+) from 104 non-permeant (BBB-) molecules. The final BBB-dataset is given in Table S2.

**Methods S3. Computation of descriptors.** Apart from robustness and speed, the choice of descriptors was based on open access and ease of implementation to allow for general applicability of our method and straightforward reproducibility of the results.

We evaluate the lipophilicity by an atomistic method that breaks up the molecular structure into fragments to which a lipophilic contribution is given according to a fragmental system. The estimated  $\log P$  of a given molecule is the sum of the lipophilic contributions of all its fragments without correction parameter. We choose to rely on the fragmental system proposed by Wildman and Crippen<sup>[9]</sup> because closely related to that of AlogP98<sup>[10]</sup> employed by Egan. However and in contrast to AlogP98, the chemical description of the 142 listed fragments is exhaustive and openly available. We implemented the exact SMARTS fragments as described in the original paper<sup>[9]</sup> in a tailor-made Python script steering the SMARTS recognition pattern engine of OpenBabel.<sup>[11]</sup> The method and values are referred to as WLOGP.

The polarity of molecules was evaluated by the polar surface area (PSA), *i.e.* the portion of the molecular surface that belongs to polar atoms. Instead of generating tridimensional geometries and actual surfaces, we opted for a well-described fragment-based technique to rapidly and accurately estimate the PSA, called the topological polar surface area (tPSA).<sup>[12]</sup> Similarly to WLOGP, this method cuts the molecular structure into two-dimensional fragments and a surface contribution is assigned to the 43 atom-types considered as polar. The estimated PSA of a given molecule is the sum of the contributions of all its fragments. The small number of fragments and their precise description makes the method unambiguous and its implementation straightforward. Many packages implementing tPSA exist. For the BOILED-Egg, we computed the tPSA with Openbabel.<sup>[11]</sup>

All molecules in SMILES description, as well as WLOGP and tPSA values are given in Tables S1 and S2, for HIA- and BBB-datasets, respectively.

**Methods S4. Definition of the ellipses.** For each dataset, WLOGP and tPSA values were normalized towards standard deviation. In both normalized two-dimensional spaces (HIA and BBB), one can define an ellipse by five parameters: the foci Cartesian coordinates  $(x_1, y_1)$  and  $(x_2, y_2)$  along with the major axis (or largest diameter,  $d$ ). By definition, the sum of distances from every point on the ellipse's trace to each focus is equal to  $d$ . Note: The final model is denormalized and depicted in the actual WLOGP *versus* tPSA referential that allow for the merging to obtain the BOILED-Egg (Figure 1e).

**Methods S5. Classification of molecules.** Any point  $P$  of the normalized two-dimensional plots WLOGP *versus* tPSA can be evaluated as follows: if the sum of distances to foci is smaller than  $d$ , then  $P$  is inside the ellipse. If the sum of distances to foci is larger than  $d$ , then  $P$  is outside the ellipse. This enabled training the classification models for both datasets. All HIA+ (or BBB+, respectively) molecules were plotted in the normalized physicochemical space and points inside a tentative ellipse were counted as true positives (TP); points outside a tentative ellipse were considered false negatives (FN). Likewise, all HIA- (or BBB-, respectively) molecules were plotted in the normalized physicochemical space and points outside a tentative ellipse were counted as true negatives (TN); points inside a tentative ellipse were considered false positives (FP).

**Methods S6. Stochastic optimization of ellipses.** To define the starting position of ellipses to be optimized, a  $9 \times 9$  grid was placed so that it spans the desired physicochemical space of normalized WLOGP *versus* tPSA plots. For HIA:  $x_1$  ranges from 0 to 175;  $y_1$  ranges from -1 to 8;  $x_2$  ranges from  $x_1$  to 175;  $y_2$  ranges from -1 to  $y_1$ . For BBB:  $x_1$  ranges from 0 to 120;  $y_1$  ranges from -1 to 8;  $x_2$  ranges from  $x_1$  to 120;  $y_2$  ranges from -1 to  $y_1$ . Foci were positioned on these points and the distance between them ( $2c$ ) calculated. For each starting position, four initial largest diameters were set as  $d = 1 \times 2c, 1.5 \times 2c, 2 \times 2c$  or  $3 \times 2c$ .

This produced about 10,000 initial vectors of 5 dimensions ( $x_1, y_1, x_2, y_2, d$ ) per dataset (HIA and BBB) to search for the best classification ellipses. To this end, each initial vector was submitted to 10 independent Monte Carlo (MC) optimizations<sup>[13]</sup>, which consist in i) start from the initial 5-dimension vector and evaluate the ellipse; ii) generate a new tentative ellipse by operating a random change in the five parameters and evaluate the ellipse; iii) determine whether the new ellipse is accepted in accordance with a Metropolis-like criterion; iv) repeat steps ii) and iii) 100,000 times.

The optimization of the five parameters was monitored in steps i) and ii) by the MCC, *i.e.* the classification capacity of the tentative ellipses. To prevent an exaggerated growth of the ellipse at the early steps of MC, we added an empirically determined small constraint on the surface of the ellipse ( $S$ ) in the normalized space. Finally, the scoring function to evaluate the tentative ellipses was:  $Score = MCC - 0.05 \times S$ .

The acceptance of a new tentative ellipse followed a Metropolis-like criterion, which implied that an ellipse was retained when its  $Score$  was higher than the one of the best ellipse so far. In case the change in the parameters led to a lower  $Score$ , it was kept with a probability defined by the  $Score$  difference between the tentative ( $Score_t$ ) and the best ellipse so far ( $Score_b$ ), and including a random number ( $r$ , between 0 and 1). In a mathematical fashion, the tentative ellipse is accepted if:  $Score_t < Score_b$  or  $Score_t < Score_b - 0.025 \times r$ .

This optimization method was applied on HIA- and BBB-datasets. The best classifying ellipse in terms of MCC for each dataset were denormalized to obtain the final model in the actual WLOGP *versus* tPSA referential (as depicted in Figure 1c and Figure 1d for HIA and BBB, respectively and to Figure 1e for the merged BOILED-Egg model). The normalized and denormalized final ellipses are described in more detail in Data S1 and Figure S1 for HIA, and S Data S2 and Figure S2 for BBB.



**Methods S7. Evaluation of classification.** In contrast to the Egan egg, all our tentative ellipses were evaluated according to their ability to include as many HIA+ (or BBB+, respectively) and to exclude as many HIA- (or BBB-, respectively) as possible. The Matthews correlation coefficient (MCC) allowed measuring performance of a given ellipse including correctly and incorrectly classified points as expressed by equation (1).

$$MCC = \frac{TP \times TN - FP \times FN}{\sqrt{(TP + FP)(TP + FN)(TN + FP)(TN + FN)}}$$

MCC varies from -1 for all points misclassified to 1 for perfect classification. A value near 0 reveals random classification.

**Methods S8. Cross-validation.** In order to assess robustness, the best classification ellipses were submitted to cross-validation. This procedure consists in splitting the entire dataset into a training set and a validation set. The model is re-trained on the new training set and the classification ability evaluated for the molecules belonging to the validation set. In the present case, 10-fold cross-validations were performed for HIA- and BBB-datasets, independently. We attributed every tenth entry of the dataset ranked by tPSA values to the validation set. This was repeated ten times starting from entries number 1, 2, 3, 4, 5, 6, 7, 8, 9 or 10 to obtain ten different couples of training/validation sets covering the broadest possible range of polarity. The ellipses were optimized on each training set, and MCC as well as accuracy computed for the molecules belonging to the corresponding validation set. The cross-validated MCC ( $MCC_{CV}$ ) and cross-validated accuracy were averaged over the ten validation sets (refer to Tables S3 and S4; and to Figures S3 and S4).

**Methods S9. Predictions for new molecular structures.** Any molecular structure can be plotted in the BOILED-Egg (*e.g.* through the Excel spreadsheet as Data S3). Calculation of both descriptors should be as similar as possible to the protocol described in Method S3. To avoid misclassification by erroneous physicochemical description, the chemical structure should be unsalted and in its neutral form. The tPSA must follow the strict definition of the original paper<sup>[12]</sup>, accounting for sulfur and phosphate polar atoms as well. Most importantly, the log *P* must be calculated with WLOGP and not another method because of possible significant discrepancies in predicted log *P* values.<sup>[14]</sup>

The best way to assess gastrointestinal absorption and brain penetration is certainly to visually inspect whether a point lies inside or outside of the HIA and BBB ellipses, so of BOILED-Egg's white and yolk, respectively (Figure 1e and Data S3). As an illustration, we plotted in the referential of the BOILED-Egg 46 NCEs accepted by the FDA between January 2014 and September 2015 (<http://www.accessdata.fda.gov/scripts/cder/drugsatfda/> accessed October 1<sup>st</sup>, 2015), excluding prodrugs and compounds of unclear oral bioavailability. As only three of these 46 molecules are part of our HIA-dataset, this test set can be considered as external. Besides, only compounds with enough evidence of brain access are tagged as BBB permeant (refer to FDA-dataset in Table S5). However, one can suspect that for some of these recent molecules, active transporters or efflux pumps remain to be discovered.



|                             |                                                                                     |        |       |   |
|-----------------------------|-------------------------------------------------------------------------------------|--------|-------|---|
| Buspirone                   | O=C1CC2(CCCC2)CC(=O)N1CCCCN1CCN(CC1)c1nccc1                                         | 69.54  | 1.62  | + |
| Busulfan                    | CS(=O)(=O)OCCCCOS(C)=O=O                                                            | 103.04 | 0.30  | + |
| Butylscopolamine            | CCCC[N+](C)C2CC(C(C1OC21)OC(=O)C(O)C)c1cccc1                                        | 59.06  | 1.85  | - |
| Caffeine                    | Cn1cnc2n(C)c(=O)n(C)c(=O)c1c2                                                       | 61.77  | 2.25  | + |
| Calcitriol                  | CC(CCCC(C)(C)O)C1CCC2C(CCCC12C)=CC=C1CC(O)CC(O)C1=C                                 | 60.47  | 2.83  | + |
| Camazepam                   | CN(C)(C)=OC1N=C(c2cccc2)c2cc(Cl)ccc2N(C)C1=O                                        | 61.82  | -1.03 | + |
| Candoxatril                 | COCCOCC(C(C1(CCCC1)C(=O)NC1CCC(C(C1)C(O)=O)C(N2C1=O)C(O)=O)Oc1ccc2CCCC2c1           | 110.00 | 2.03  | + |
| Capecitabine                | CCCCOC(=O)Nc1nc(=O)n(cc1F)C1OC(C)C(O)C1O                                            | 121.70 | 3.04  | + |
| Capreomycin                 | CC1NC(=O)C(N)CNC(=O)C(NC(=O)C(NC(=O)C(CNC(=O)CC(N)CCCN)NC1=O)=CNC(N)=O)C1CCN=C(N)N1 | 358.19 | -9.87 | - |
| Captopril                   | CC(CS)C(=O)N1CCCC1C(O)=O                                                            | 96.31  | 3.70  | + |
| Carbamazepine               | NC(=O)N1c2cccc2C=Cc2cccc12                                                          | 46.32  | 1.28  | + |
| Carbamazepine-10,11-epoxide | NC(=O)N1c2cccc2C2OC2c2cccc12                                                        | 58.56  | 3.24  | + |
| Carbimazole                 | CCOC(=O)n1ccn(C)c1=S                                                                | 68.01  | -0.31 | + |
| Carfecillin                 | CC1(C)SC2C(NC(=O)C(C)C(O)=O)c3cccc3C(=O)N2C1C(O)=O                                  | 148.82 | -1.37 | + |
| Carglumic_Acid              | NC(=O)NC(CCC(O)=O)C(O)=O                                                            | 128.59 | -0.34 | + |
| Carmustine                  | C1CCNC(=O)N(CCC)N=O                                                                 | 61.69  | 1.78  | + |
| Carprofen                   | CC(C)(O)=O)c1ccc2c(c1)[nH]c1ccc(Cl)cc21                                             | 52.93  | 1.61  | + |
| Carteolol                   | CC(C)(C)NCC(O)COc1cccc2NC(=O)CCc12                                                  | 70.50  | 0.73  | + |
| Carvedilol                  | COc1cccc1OCCNCC(O)OCc1cccc2[nH]c3cccc3c12                                           | 75.63  | 2.90  | + |
| Cefazolin                   | Cc1nnc(SCC2=C(N3C(SC2)C(NC(=O)Cn2cnnc2)C3=O)C(O)=O)Js1                              | 234.93 | -1.02 | - |
| Cefmetazole                 | COC1(NC(=O)CSCC#N)C2SCC(CSc3nncn3C)=C(N2C1=O)C(O)=O                                 | 239.23 | -1.11 | - |
| Cefodizime                  | CON=C(C(=O)NC1C2SCC(CSc3nc(C)C(CC(O)=O)Js3)=C(N2C1=O)C(O)=O)c1csc(N)n1              | 304.48 | 0.63  | - |
| Ceforanide                  | NCc1cccc1CC(=O)NC1C2SCC(CSc3nncn3C(O)=O)=C(N2C1=O)C(O)=O                            | 244.23 | -1.24 | - |
| Cefotaxime                  | CON=C(C(=O)NC1C2SCC(COC(C)=O)C(N2C1=O)C(O)=O)c1csc(N)n1                             | 209.98 | -0.01 | - |
| Cefpirome                   | CON=C(C(=O)NC1C2SCC(C[n+](3cccc3)=C(N2C1=O)C(O)=O)c1csc(N)n1                        | 205.68 | 0.22  | - |
| Cefprozil                   | CC=CC1=C(N2C(SC1)C(NC(=O)C(N)c1ccc(O)cc1)C2=O)C(O)=O                                | 154.03 | 5.09  | + |
| Ceftazidime                 | CC(C)(ON=C(C(=O)NC1C2SCC(C[n+](3cccc3)=C(N2C1=O)C(O)=O)c1csc(N)n1)C(O)=O            | 242.98 | 0.46  | - |
| Celecoxib                   | Cc1ccc(cc1)-c1cc(nn1-c1ccc(cc1)S(N)(=O)=O)C(F)F                                     | 86.30  | 4.97  | + |
| Cephalothin                 | CC(=O)OCC1=C(N2C(SC1)C(NC(=O)Cc1cccc1)C2=O)C(O)=O                                   | 166.55 | 0.21  | - |
| Chenodeoxycholic_Acid       | CC(CCC(O)=O)C1CCC2C3(C)CC4CC(O)CCC4(C)C3CCC12C                                      | 76.90  | 3.90  | + |
| Chloral_Hydrate             | OC(O)C(Cl)Cl                                                                        | 39.82  | 2.82  | + |
| Chlorambucil                | OC(=O)CCc1ccc(cc1)N(CCC)CCCl                                                        | 40.46  | 4.83  | + |
| Chloramphenicol             | OCC(NC(=O)C(Cl)Cl)C(O)c1ccc(cc1)[N+](O-)=O                                          | 118.81 | 2.65  | + |
| Chloridiazepoxide           | CNC1=Nc2ccc(Cl)cc2C(c2cccc2)=[N+](O-)=O                                             | 56.84  | 4.35  | + |
| Chlorguanide                | CC(C)NC(=N)NC(=N)Nc1ccc(Cl)cc1                                                      | 83.65  | 2.82  | + |
| Chlormexidine               | C1c1ccc(NC(=N)NC(=N)NCCCNC(=N)NC(=N)Nc2ccc(Cl)cc2)cc1                               | 167.58 | 3.01  | - |
| Chlormezanone               | CN1C(c2ccc(Cl)cc2)S(=O)(=O)CCC1=O                                                   | 62.54  | 2.52  | + |
| Chlorothiazide              | NS(=O)(=O)c1ccc2c(cc1N)N=CNS2(=O)=O                                                 | 135.12 | 2.38  | + |
| Chloroxine                  | Oc1c(Cl)cc(Cl)c2ccnc12                                                              | 33.12  | 3.25  | + |
| Chlorphenesin               | OCC(O)COc1ccc(Cl)cc1                                                                | 49.41  | 1.71  | + |
| Chlorpheniramine            | CN(C)CCN(c1ccc(Cl)cc1)c1ccccc1                                                      | 19.37  | 3.43  | + |
| Chlorpropamide              | CCCNC(=O)NS(=O)(=O)c1ccc(Cl)cc1                                                     | 83.55  | 0.68  | + |
| Chlorthalidone              | NS(=O)(=O)c1cc(ccc1Cl)C1(O)NC(=O)c2cccc12                                           | 117.17 | 3.93  | + |
| Chlorzoxazone               | C1c1ccc2oc(=O)[nH]c2c1                                                              | 45.98  | 5.06  | + |
| Cibenzoline                 | C1C(C2=NCCN2)C1(c1cccc1)c1ccccc1                                                    | 24.39  | 2.23  | + |
| Cicaprost                   | CCC#CCC(C)C(O)C#CC1C(O)CC2CC(C1)C2=CCOCC(O)=O                                       | 86.89  | 2.02  | + |
| Cicloprolol                 | CC(C)NCC(O)COc1ccc(OCCOCC2CC2)cc1                                                   | 59.95  | 2.21  | + |
| Cidofovir                   | Nc1ccn(CC(CO)OCP(O)(O)=O)c(=O)n1                                                    | 157.71 | -1.65 | - |
| Cilazaprilat                | OC(=O)C(CCC1CCCC1)NC1CCCC2CCCC(N2C1=O)C(O)=O                                        | 110.18 | 0.36  | - |
| Cilomilast                  | COc1ccc(cc1OC1CCCC1)C1(CCC(C1)C(O)=O)C#N                                            | 79.37  | 2.55  | + |
| Cinchonine                  | OC1C1CC2CCN1CC2C=C)c1ccn2cccc12                                                     | 36.36  | 2.46  | + |
| Cinolazepam                 | OC1N=C(c2cccc2F)c2cc(Cl)ccc2N(CCC#N)C1=O                                            | 76.38  | 3.48  | + |
| Cinoxacin                   | Cc1nc(C(O)=O)c(=O)c2cc3OCC3cc12                                                     | 90.44  | 0.76  | + |
| Ciprofibrate                | CC(C)(O)c1ccc(cc1)C1CC1(Cl)Cl(O)=O                                                  | 46.53  | 5.06  | + |
| Cisapride                   | COC1CN(CCCO2ccc(F)cc2)CCC1NC(=O)c1cc(Cl)c(N)cc1OC                                   | 85.61  | 0.22  | + |
| Citalopram                  | CN(C)CCCC1(OCC2ccc(ccc12)C#N)c1ccc(F)cc1                                            | 36.26  | 3.97  | + |
| Clavulanic_Acid             | OCC=C1OC2CC(=O)N2C1C(O)=O                                                           | 86.99  | 2.38  | + |
| Clenbuterol                 | CC(C)(C)NCC(O)c1cc(Cl)c(N)c(Cl)c1                                                   | 58.22  | 6.45  | + |
| Clinafloxacin               | NC1CCN(C1)c1c(F)cc2c(c1Cl)n(cc(C(O)=O)c2=O)C1CC1                                    | 87.71  | 0.51  | + |
| Clindamycin                 | CCCC1CC(N(C)C)C(=O)NC(C(C)Cl)C1OC(SC)C(O)C(O)C1O                                    | 127.10 | 3.93  | + |
| Clobazam                    | CN1c2ccc(Cl)cc2N(c2cccc2)C(=O)CC1=O                                                 | 40.54  | 5.18  | + |
| Clodronate                  | OP(O)(=O)C(Cl)(Cl)P(O)(O)=O                                                         | 134.68 | 0.43  | - |
| Clofibrate                  | CCOC(=O)C(C)(C)Oc1ccc(Cl)cc1                                                        | 35.53  | 3.06  | + |
| Clomethiazole               | Cc1nsc1CCC1                                                                         | 41.13  | 3.23  | + |
| Clomipramine                | CN(C)CCCN1c2cccc2CCc2ccc(Cl)cc212                                                   | 6.48   | 4.15  | + |
| Clonazepam                  | [O-][N+](=O)c1ccc2NC(=O)CN=C(c3cccc3Cl)c2c1                                         | 91.02  | 1.96  | + |
| Clonidine                   | C1c1ccc(Cl)c1N=C1NCCN1                                                              | 36.42  | 1.41  | + |
| Clopidogrel                 | COC(=O)C(N1CCc2sc2C1)c1ccccc1Cl                                                     | 57.61  | 2.50  | + |
| Clorazepate                 | OC(=O)C1N=C(c2cccc2)c2cc(Cl)ccc2NC1=O                                               | 78.61  | 0.89  | + |
| Cloxacillin                 | Cc1onc(c1C(=O)NC1C2SC(C)C(O)C(N2C1=O)C(O)=O)c1ccccc1Cl                              | 136.22 | 2.15  | + |
| Codeine                     | COc1ccc2CC3C4C=CC(O)C5O1c2C45CCN3C                                                  | 41.57  | 1.02  | + |
| Colestipol                  | NCCNCCNCCNCCN                                                                       | 105.11 | -6.84 | - |
| Conivaptan                  | Cc1nc2CCN(C(=O)c3ccc(NC(=O)c4cccc4-c4cccc4)cc3)c3cccc3-c2[nH]1                      | 78.02  | 4.73  | + |
| Cotinine                    | CN1C(CCC1=O)c1ccnc1                                                                 | 33.20  | 0.67  | + |
| Coumarin                    | O=c1ccc2cccc2o1                                                                     | 30.21  | 1.79  | + |
| Cromolyn                    | OC(COc1cccc2oc(cc(=O)c12)C(O)=O)COc1cccc2oc(cc(=O)c12)C(O)=O                        | 173.71 | 2.11  | - |
| Cyclopenthiiazide           | NS(=O)(=O)c1cc2c(NC(CN3CCCC3)NS2(=O)=O)cc1Cl                                        | 138.04 | 2.17  | + |
| Cyclophosphamide            | C1CCN(CCC1)P1(=O)NCCCO1                                                             | 51.37  | 2.46  | + |
| Cymarin                     | COC1CC(OC2CCC3(C=C)C4CCC5(O)C(CCC5(O)C4CCC3(O)C2)C2=CC(=O)OC2)OC(C)C1O              | 114.29 | 3.24  | + |
| Cyproheptadine              | CN1CCC(CC1)=C1c2cccc2C=Cc2cccc12                                                    | 3.24   | 4.10  | + |
| Dalfampridine               | Nc1ccncc1                                                                           | 38.77  | 2.53  | + |
| Dantrolene                  | [O-][N+](=O)c1ccc(cc1)-c1ccc(C=NN2CC(=O)NC2=O)j1                                    | 123.92 | 0.69  | + |
| Dapirazole                  | Cc1ccccc1N1CCN(CCC2nnc3CCCCn23)CC1                                                  | 37.19  | 1.53  | - |
| Dapsone                     | Nc1ccc(cc1)S(=O)(=O)c1ccc(O)cc1                                                     | 88.56  | 2.34  | + |
| Deferoxamine                | CC(=O)N(O)CCCCNC(=O)CC(C(=O)N(O)CCCCNC(=O)CCC(=O)N(O)CCCCN                          | 205.84 | 0.92  | - |
| Delapril                    | CCOC(=O)C(Cc1cccc1)NC(C)C(=O)N(C(C(O)=O)C1Cc2cccc2C1                                | 95.94  | 2.19  | + |
| Delavirdine                 | CC(C)Nc1ccnnc1N1CCN(C1)C(=O)c1cc2cc(NS(C)=O)=O)ccc2[nH]1                            | 118.31 | 3.12  | + |
| Delmopinol                  | CCCC(CCC)CCCC1COCCN1CCO                                                             | 32.70  | 2.69  | + |
| Desmethyldiazepam           | C1c1ccc2NC(=O)CN=C(c3cccc3)c2c1                                                     | 41.13  | 2.23  | + |
| Desogestrel                 | CCC12CC(=C)C3C(CCC4=CCCCC34)C1CCC2(O)C#C                                            | 20.23  | 4.95  | + |
| Dextromoramide              | CC(CN1COCC1)C(C(=O)N1CCCC1)c1ccccc1c1ccccc1                                         | 32.78  | 2.80  | + |
| Diazepam                    | CN1c2ccc(Cl)cc2C(=NCC1=O)c1ccccc1                                                   | 32.67  | 2.39  | + |
| Diazoxide                   | CC1=Nc2ccc(Cl)cc2S(=O)(=O)N1                                                        | 66.48  | 0.28  | + |
| Diclofenac                  | OC(=O)Cc1cccc1Nc1ccc(Cl)cc1Cl                                                       | 48.95  | 4.44  | + |
| Dicyclomine                 | CCN(CC)CCOC(=O)C1(CCCCC1)C1CCCC1                                                    | 29.54  | 4.40  | + |
| Didanosine                  | OC1CCC(O)1n1cnc2c1[nH]nc2=O                                                         | 92.95  | 1.89  | + |
| Dienogest                   | CC12CCC3=C4CCC(=O)C=C4CCC3C1CCC2(O)CC#N                                             | 61.02  | 3.83  | + |

|                    |                                                                                               |        |       |   |
|--------------------|-----------------------------------------------------------------------------------------------|--------|-------|---|
| Diethylcarbamazine | CCN(CC)C(=O)N1CCN(C)CC1                                                                       | 26.79  | -0.07 | + |
| Diethylpropion     | CCN(CC)C(C)C(=O)c1ccccc1                                                                      | 20.31  | 2.60  | + |
| Diethylstilbestrol | CCC(=C(C)C)c1ccc(O)cc1)c1ccc(O)cc1                                                            | 40.46  | 0.67  | + |
| Diflunisal         | OC(=O)c1cc(ccc1O)-c1ccc(F)cc1F                                                                | 57.28  | 1.91  | + |
| Dihydrocodeine     | CCOc1ccc2C3C4CC(O)C5Oc1c2C45CCN3C                                                             | 41.93  | 1.12  | + |
| Dihydroergotamine  | CN1CC(CCC2C1Cc1[nH]c3ccc2c13)C(=O)NC1(C)OC2(O)C3CCCN3C(=O)C(Cc3ccccc3)N2C1=O                  | 117.87 | 3.45  | + |
| Diloxanide         | CN(C(=O)C(C)C)c1ccc(O)cc1                                                                     | 40.54  | 3.38  | + |
| Diphenoxylate      | CCOC(=O)C1(CCN(CCC(C#N)(c2ccccc2)c2ccccc2)CC1)c1ccccc1                                        | 53.16  | 1.48  | + |
| Disopyramide       | GC(C)N(CCC(C(N)=O)(c1ccccc1)c1ccccc1)C(C)C                                                    | 59.00  | 0.67  | + |
| Distigmine         | CN(CCCCCCN(C)C(=O)Oc1ccc[n+](C)C1)C(=O)Oc1ccc[n+](C)C1                                        | 68.94  | 4.05  | - |
| Disulfiram         | CCN(CC)C(=S)SSC(=S)N(CC)CC                                                                    | 121.24 | 0.32  | - |
| Dofetilide         | CN(CCOc1ccc(NS(C)(=O)=O)cc1)CCc1ccc(NS(C)(=O)=O)cc1                                           | 121.26 | 3.62  | + |
| Dolasetron         | O=C(OC1CC2CC3CC(C1)N2CC3=O)c1c[nH]c2ccccc12                                                   | 62.30  | 0.54  | + |
| Dothiepin          | CN(C)CCC=C1c2ccccc2Cc2ccccc12                                                                 | 28.54  | 4.52  | + |
| Doxapram           | CCN1CC(CCN2CCOC2)C(C1=O)(c1ccccc1)c1ccccc1                                                    | 32.78  | 2.41  | + |
| Doxazosin          | COc1cc2nc(nc(N)c2cc1OC)N1CCN(CC1)C(=O)C1OC2ccccc2O1                                           | 112.07 | 4.01  | + |
| Doxepin            | CN(C)CCCC1c2ccccc2COc2ccccc12                                                                 | 12.47  | 3.90  | + |
| Drotaverine        | CCOCc1ccc(C=C2NCc3ccc(OCC)(CC)cc23)cc1OCC                                                     | 48.55  | 3.63  | + |
| EDTA               | OC(=O)CN(CCN(C(C(=O)O)CC(O)O)CC(O)O)                                                          | 155.68 | -2.07 | - |
| Eflornithine       | NCCCC(N)(C(F)F)C(O)=O                                                                         | 89.27  | 2.88  | + |
| Emtricitabine      | Nc1nc(=O)n(cc1F)C1CSC(CO)O1                                                                   | 115.67 | -0.91 | + |
| Enalaprilat        | CCOC(=O)C(Cc1c1ccccc1)NC(C)C(=O)N1CCCC1C(O)=O                                                 | 95.94  | 1.22  | - |
| Encainide          | COc1ccc(cc1)C(=O)Nc1ccccc1CC1CCCC1C                                                           | 41.49  | 1.73  | + |
| Enoxacin           | CCn1cc(C(O)=O)c(=O)c2cc(F)c(nc12)N1CCNCC1                                                     | 87.13  | 3.86  | + |
| Enoximone          | CSc1ccc(cc1)C(=O)c1[nH]c(=O)[nH]c1c                                                           | 91.01  | 0.53  | + |
| Entacapone         | CCN(CC)C(=O)C(=Cc1cc(O)c(O)c1)[N+][O-]=O)C#N                                                  | 133.06 | 3.77  | + |
| Entecavir          | Nc1nc2n(cnc2c(=O)[nH]1)C1CC(O)(CO)C1=C                                                        | 129.72 | -1.03 | + |
| Enzalutamide       | CNC(=O)c1ccc(cc1F)N1C(=S)N(C(=O)C1(C)C)c1ccc(C#N)c(c1)C(F)F                                   | 108.26 | 3.42  | + |
| Ephedrine          | CNC(C)C(O)c1ccccc1                                                                            | 32.26  | 1.00  | + |
| Epristeride        | CC(C)C)NC(=O)C1CC2C3CC=C4C=C(CCC4)C3CCC12C)C(O)=O                                             | 65.78  | 1.27  | + |
| Eprosartan         | CCCCc1ncc(C=C(Cc2cccs2)C(O)=O)n1Cc1ccc(cc1)C(O)=O                                             | 120.66 | 4.64  | - |
| Ergotamine         | CN1CC(C=C2C1Cc1[nH]c3ccc2c13)C(=O)NC1(C)OC2(O)C3CCCN3C(=O)C(Cc3ccccc3)N2C1=O                  | 118.21 | 0.94  | + |
| Ertapenem          | CC(O)C1C2C(C)C(SC3CNC(C3)C(=O)Nc3ccccc3)C(O)=O)C(N2C1=O)C(O)=O                                | 181.57 | -0.01 | - |
| Estazolam          | C1c1ccc-2c(c1)C(=N)C1nncn-21)c1ccccc1                                                         | 43.07  | 3.05  | + |
| Estramustine       | CC12CC3C(Cc4cc(OC(=O)N(CCC)CC1)ccc34)C1CCC2O                                                  | 49.77  | 1.55  | + |
| Ethacrynic_Acid    | CCC(=O)C(=O)c1ccc(OCC(O)=O)c(Cl)c1Cl                                                          | 80.57  | 5.18  | + |
| Ethambutol         | CCC(CO)NCCN(C)CCO                                                                             | 64.43  | 1.66  | + |
| Ethanol            | CCO                                                                                           | 20.23  | 0.00  | + |
| Ethionamide        | CCc1ccc(ccn1)C(N)=S                                                                           | 70.91  | 1.34  | + |
| Ethosuximide       | CCC1(C)CC(=O)NC1=O                                                                            | 46.00  | 1.77  | + |
| Ethylmorphine      | CCN1CCC23C4OC5=C(O)C=CC(C1C2=C(C4O)C35                                                        | 52.90  | 1.71  | + |
| Etidronate         | CC(O)(P(O)(O)=O)P(O)(O)=O                                                                     | 154.91 | -0.99 | - |
| Etilefrine         | CCNCC(O)c1ccc(O)c1                                                                            | 52.01  | 3.47  | + |
| Etodolac           | CCc1ccccc2C3CCOC(C(C)=O)C(CO)=O)C3NC12                                                        | 95.58  | 1.81  | + |
| Etoricoxib         | C1ccc(ccn1)-c1c(cc(Cl)d[n+]1[O-])c1ccc(cc1)S(O)(=O)=O                                         | 80.39  | 2.90  | + |
| Etravirine         | Cc1cc(cc(C)c1)Oc1nc(Nc2ccc(cc2)C#N)nc(N)c1Br)C#N                                              | 120.64 | 4.73  | - |
| Ezetimibe          | OC(CCC1C(N(C1=O)c1ccc(F)cc1)c1ccc(O)cc1)c1ccc(F)cc1                                           | 60.69  | 5.56  | + |
| Ezogabine          | CCOC(=O)Nc1ccc(NCc2ccc(F)cc2)cc1N                                                             | 76.36  | 0.79  | + |
| Febuxostat         | CC(C)COCc1ccc(cc1C#N)-c1nc(C)c(s1)C(O)=O                                                      | 111.16 | 4.07  | + |
| Felbamate          | NC(=O)OCC(COC(N)=O)c1ccccc1                                                                   | 104.21 | 3.50  | + |
| Felodipine         | CCOC(=O)C1=C(C)NC(C)C=C(C1c1c1ccccc1Cl)C1C)C(=O)OC                                            | 64.52  | -0.29 | + |
| Fenclofenac        | OC(=O)Cc1ccccc1Oc1ccc(Cl)cc1Cl                                                                | 46.53  | 3.59  | + |
| Fenfluramine       | CCNCC(C)c1ccc(cc1)C(F)F                                                                       | 12.03  | 4.57  | + |
| Fenofibrate        | CC(C)OC(=O)C(C)C(O)c1ccc(cc1)C(=O)c1ccc(Cl)cc1                                                | 52.49  | 0.71  | + |
| Fenpropfen         | CC(C)C(O)=O)c1ccc(Oc2ccccc2)c1                                                                | 46.53  | 4.41  | + |
| Fenoterol          | CC(Cc1ccc(O)cc1)NC(O)Cc1cc(O)cc(O)c1                                                          | 92.78  | 3.95  | + |
| Fenspiride         | O=C1NCC2(CCN(Cc3ccccc3)CC2)O1                                                                 | 41.57  | 3.79  | + |
| Feprazone          | CC(C)=CCC1C(=O)N(N(C1=O)c1ccccc1)c1ccccc1                                                     | 40.62  | 2.61  | + |
| Finasteride        | CC(C)(C)NC(=O)C1CCC2C3CC4NC(=O)C=CC4(C)C3CCC12C                                               | 57.78  | 2.82  | + |
| Flecainide         | FC(F)F)COCc1ccc(OCC(F)F)F)c(c1)C(=O)NCC1CCCCN1                                                | 59.30  | 2.84  | + |
| Fleroxacin         | CN1CCN(CC1)c1c(F)cc2C(=O)C(CN(CCF)c2c1F)C(O)=O                                                | 63.83  | 0.72  | + |
| Fluconazole        | OC(Cn1cncn1)(Cn1cncn1)c1ccc(F)cc1F                                                            | 81.47  | 1.34  | + |
| Flucytosine        | Nc1nc(=O)[nH]cc1F                                                                             | 71.77  | 1.03  | + |
| Flumazenil         | CCOC(=O)c1ncc-2c1CN(C)C(=O)c1cc(F)ccc-21                                                      | 64.09  | 1.51  | + |
| Flunarizine        | Fc1ccc(cc1)C(N1CCN(CCCc2ccccc2)CC1)c1ccc(F)cc1                                                | 6.48   | 5.06  | + |
| Flunisolide        | CC1(C)OC2CC3C4CC(F)C5=C(C(=O)C=CC5(C)C4(C)OC3)C2(O1)C(=O)CO                                   | 93.06  | 2.72  | + |
| Flunitrazepam      | CN1c2ccc(cc2C(=NCC1=O)c1ccccc1F)N+([O-])=O                                                    | 82.25  | 1.47  | + |
| Fluocortolone      | CC1C2C3CC(F)C4=C(C(=O)C=CC4)C3(C)C2(C)C1C(=O)CO                                               | 74.57  | 1.87  | + |
| Fluoxetine         | CNCCC(Oc1ccc(cc1)C(F)F)c1ccccc1                                                               | 21.26  | 5.26  | + |
| Fluoxymesterone    | CC1(O)CCC2C3CCC4=CC(=O)CCC4(C)C3(F)C(O)CC12C                                                  | 57.53  | 3.88  | + |
| Flupenthixol       | OCCN1CCN(CCC=C2c3ccccc3Sc3ccc(cc23)C(F)F)CC1                                                  | 51.38  | 1.50  | + |
| Flupirtine         | CCOC(=O)Nc1ccc(NCc2ccc(F)cc2)nc1N                                                             | 88.77  | 2.90  | + |
| Flurazepam         | CCN(CC)CCN1c2ccc(Cl)cc2C(=NCC1=O)c1ccccc1F                                                    | 35.91  | 3.66  | + |
| Flurbiprofen       | CC(C)C(O)=O)c1ccc(cc1)-c1ccccc1F                                                              | 37.30  | 4.10  | + |
| Flutamide          | CC(C)C(=O)Nc1ccc(cc1)C(F)F)N+([O-])=O                                                         | 78.76  | 1.63  | + |
| Fluvastatin        | CC(C)n1c(C=CC(O)CC(O)C(O)=O)c(-c2ccc(F)cc2)c2ccccc12                                          | 82.61  | 3.17  | + |
| Fluvoxamine        | COCCCC(=NOCCN)c1ccc(cc1)C(F)F                                                                 | 55.53  | 2.79  | + |
| Fomepizole         | Cc1cn[nH]c1                                                                                   | 28.68  | 0.72  | + |
| Fosfomycin         | CC1OC1P(O)(O)=O                                                                               | 79.55  | 4.05  | + |
| Fosmidomycin       | ON(CCCP(O)(O)=O)C=O                                                                           | 107.51 | 3.76  | + |
| Frovatriptan       | CN1CCc2[nH]c3ccc(cc3c2C1)C(N)=O                                                               | 70.59  | 1.13  | + |
| Galantamine        | COc1ccc2CN(C)CCC34C=CC(O)CC3Oc1c24                                                            | 41.93  | 1.34  | + |
| Gallopamil         | COc1ccc(CCN(C)CCC(C#N)(C)C)C2cc(OC)c(OC)c(O)c2cc1OC                                           | 72.83  | 4.20  | + |
| Gatifloxacin       | COc1c(N2CCN(C)C2)c(F)cc2c1n(cc(C(O)=O)c2=O)C1CC1                                              | 83.79  | 2.02  | + |
| Gemfibrozil        | Cc1ccc(C)c(OCCC(C)C)C(O)=O)c1                                                                 | 46.53  | 3.67  | + |
| Genaconazole       | CC(C)C(O)(Cn1cncn1)c1ccc(F)cc1F)S(C)(=O)=O                                                    | 93.06  | 2.58  | + |
| Gentamicin_C1      | CNC(C)C1CCC(N)C(OC2C(N)CC(N)C(OC3OCC(C)(O)C(NC)C3O)C2O)O1                                     | 199.73 | -3.33 | - |
| Gentamicin_C1a     | CCC1CCC(N)C(OC2C(N)CC(N)C(OC3OCC(C)(O)C(NC)C3O)C2O)O1                                         | 187.70 | -2.53 | - |
| Gestodene          | CCC12CC3C(CCC4=C(C(=O)CCC34)C1C=CC2(O)C#C                                                     | 37.30  | 3.74  | + |
| Ginkgolide_A       | CC1C(=O)OC2C3C4C5CC(C(C)C)C33C(O)C(=O)OC3OC4(C(=O)O5)C12O                                     | 127.56 | 0.01  | + |
| Ginkgolide_B       | CC1C(=O)OC2C(O)C34C5CC(C(C)C)C33C(O)C(=O)OC3OC4(C(=O)O5)C12O                                  | 148.07 | -1.91 | + |
| Gitoxin            | CC10C(C)C(O)OC1C(O)CC(O)C2C(O)CC(O)C3CC4(C)C(CCC5C4CC4)C(C)C(O)CC54O)C4=C(=O)OC4)C3)OC2C)OC1C | 180.08 | 1.52  | + |
| Glibornuride       | Cc1ccc(cc1)S(=O)(=O)NC(=O)NC1C(O)C2(C)CCC1C2)C(C                                              | 103.55 | 2.20  | + |
| Gliclazide         | Cc1ccc(cc1)S(=O)(=O)NC(=O)NN1CC2CCCC2C1                                                       | 86.36  | 5.75  | + |
| Glimepiride        | CCC1=C(C)CN(C(=O)NCCC2ccc(cc2)S(=O)(=O)NC(=O)NC2CCC(C)CC2)C1=O                                | 130.69 | -0.25 | + |
| Glipizide          | Cc1cnc(cn1)C(=O)NCCc1ccc(cc1)S(=O)(=O)NC(=O)NC1CCCC1                                          | 138.36 | 0.94  | + |
| Gliquidone         | COc1ccc2c(c1)C(=O)N(CCCc1ccc(cc1)S(=O)(=O)NC(=O)NC1CCCC1)C(=O)C2(C)C                          | 130.05 | -0.82 | + |
| GlycerylNitrate    | OCC(O)CON+([O-])=O                                                                            | 99.07  | 3.25  | + |

|                     |                                                                                                       |        |       |   |
|---------------------|-------------------------------------------------------------------------------------------------------|--------|-------|---|
| Glycopyrrolate      | C[N+](C)CCC(C1)OC(=O)C(O)(C1CCCC1)c1ccccc1                                                            | 46.53  | 1.97  | - |
| Glymidine           | COCOCc1cnc(NS(=O)(=O)c2ccccc2)nc1                                                                     | 98.24  | 5.69  | + |
| Granisetron         | CN1C2CCGC1CC(C2)NC(=O)c1nn(C)c2ccccc12                                                                | 49.85  | 2.41  | + |
| Guanabenz           | NC(=N)NN=Cc1c(Cl)cccc1Cl                                                                              | 73.80  | 1.54  | + |
| Guanadrel           | NC(=N)NCC1COC2(CCCCC2)O1                                                                              | 79.87  | -0.09 | + |
| Guanfacine          | NC(N)=NC(=O)Cc1c(Cl)cccc1Cl                                                                           | 81.26  | 2.84  | + |
| Guanoxan            | NC(=N)NCC1COCc2ccccc2O1                                                                               | 80.36  | 0.55  | + |
| HBED                | OC(=O)CN(CCN(C(C(O)=O)Cc1ccccc1O)Cc1ccccc1O                                                           | 121.54 | 1.27  | - |
| Hexobarbital        | CN1C(O)=NC(=O)C(C)(C2=C(CCCG2)C1=O                                                                    | 69.89  | 3.36  | + |
| Hydralazine         | NNc1nccc2ccccc12                                                                                      | 63.60  | 2.29  | + |
| Hydrocodone         | COc1ccc2CC3C4CCC(=O)C5Oc1c2C45CCN3C                                                                   | 38.49  | 0.99  | + |
| Hydroflumethiazide  | NS(=O)(=O)c1cc2c(NCNS2(=O)=O)cc1C(F)(F)F                                                              | 135.12 | 3.99  | + |
| Hydroxychloroquine  | CCN(CCO)CCC(C)Nc1ccnc2cc(Cl)ccc12                                                                     | 48.39  | 0.07  | + |
| Hydroxyurea         | NC(=O)NO                                                                                              | 75.35  | 0.41  | + |
| Hydroxyzine         | OCCOCCN1CCN(CC1)C(c1ccccc1)c1cc(Cl)cc1                                                                | 35.94  | 1.97  | + |
| Ibutilide           | CCCCCCN(C)C(CCC(C)O)c1ccc(NS(C)=O)O)cc1                                                               | 77.82  | 2.54  | + |
| Idazoxan            | C1CN=C(N1)C1COc2ccccc2O1                                                                              | 42.59  | 2.45  | + |
| Ifosfamide          | C1CCNP1(=O)OCCCN1CCCC1                                                                                | 51.38  | 1.50  | + |
| Imidapril           | CCOC(=O)C(Cc1ccccc1)NC(C)C(=O)N1C(CN(C)C1=O)C(O)=O                                                    | 115.70 | 4.54  | + |
| Imipenem            | CC(O)C1C2CC(SCCN=CN)=C(N2C1=O)C(O)=O                                                                  | 141.52 | -0.77 | - |
| Indapamide          | CC1Cc2ccccc2N1NC(=O)c1ccc(Cl)c(c1)S(N)(=O)=O                                                          | 100.87 | 4.30  | + |
| Indecainide         | CC(C)NCCCC1(C(N)=O)c2ccccc2-c2ccccc12                                                                 | 54.74  | 2.62  | + |
| Indobufen           | CCC(C(O)=O)c1ccc(cc1)N1Cc2ccccc2C1=O                                                                  | 57.53  | 3.75  | + |
| Indomethacin        | COc1ccc2n(cc(C(C)=O)c2c1)C(=O)c1ccccc1                                                                | 68.36  | 1.54  | + |
| Indoprofen          | CC(C(O)=O)c1ccc(cc1)N1Cc2ccccc2C1=O                                                                   | 57.61  | 2.89  | + |
| Iohexol             | CC(=O)N(C(C(O)CO)c1c(Cl)c(C(=O)NCC(O)CO)c1)C(C(=O)NCC(O)CO)c11                                        | 199.89 | -1.63 | - |
| Ipratropium         | CC(C)[N+](1)C2C(CCC1)CC(C2)OC(=O)C(CO)c1ccccc1                                                        | 46.53  | 2.47  | - |
| Irbesartan          | CCCCC1=NC2(CCC2)C(=O)N1Cc1ccc(cc1)-c1ccccc1-c1nn[nH]n1                                                | 87.07  | -1.48 | + |
| Isocarboxazid       | Cc1cc(na1)C(=O)NCCc1ccccc1                                                                            | 66.91  | 2.00  | + |
| Isoniazid           | NNC(=O)c1ccncc1                                                                                       | 67.59  | 2.01  | + |
| Isotretinoin        | CC(C=CC1=C(C)CCCC1(C)C)=CC=CC(C)=CC(O)=O                                                              | 37.30  | 5.60  | + |
| Isoxepac            | OC(=O)Cc1ccc2OCc3ccccc3C(=O)c2c1                                                                      | 63.60  | 1.31  | + |
| Isradipine          | COC(=O)C1=C(C)NC(C)=C(C1c1ccccc2nnc12)C(=O)OC(C)C                                                     | 103.50 | 1.88  | + |
| Itraconazole        | CCC(C)n1nnc(-c2ccc(cc2)N2CCN(CC2)c2ccc(OCC3COC(Cn4cncn4)(O3)c3ccc(Cl)cc3Cl)cc2)c1=O                   | 104.64 | 0.96  | + |
| Kanamycin           | CC(=O)NCC1OC(OC2C(N)CC(N)C(OC3OC(CO)C(O)C(N)C3O)C2O)C(O)C(O)C1O                                       | 285.69 | -7.11 | - |
| Kanamycin_A         | COC1CC(OC2CC3(C=O)C4CC5(C)C(CO)C4CC3(O)C2)C2=CC(=O)OC2)OC(O)C1OC1OC(COC2OC(CO)C(O)C(O)C2O)C(O)C(O)C1O | 310.28 | -2.99 | - |
| Ketanserin          | Fc1ccc(cc1)C(=O)C1CCN(Cn2c(=O)[nH]c3ccccc3c2=O)CC1                                                    | 75.01  | 1.20  | + |
| Ketazolam           | CN1c2ccc(Cl)cc2C2(OC(C)=CC(=O)N2CC1=O)c1ccccc1                                                        | 49.81  | 3.86  | + |
| Ketorolac           | OC(=O)C1CCn2c1ccc2C(=O)c1ccccc1                                                                       | 59.22  | 3.36  | + |
| Ketotifen           | CN1CCC(CC1)=C1c2ccc2C(=O)Cc2ccccc12                                                                   | 48.39  | 3.20  | + |
| Labeltalol          | CC(Cc1ccccc1)NCC(O)c1ccc(O)c(c1)C(N)=O                                                                | 95.03  | 1.30  | + |
| Lacidipine          | CCOC(=O)C1=C(C)NC(C)=C(C1c1ccccc1C=CC(=O)OC(C)C)C(=O)OCC                                              | 90.90  | 1.29  | + |
| Lacosamide          | COCC(NC(C)=O)C(=O)NCCc1ccccc1                                                                         | 67.31  | 0.60  | + |
| Leflunomide         | Cc1oncc1C(=O)Nc1ccc(cc1)C(F)(F)F                                                                      | 55.12  | 1.40  | + |
| Letrozole           | N#C#C1ccc(cc1)C(c1ccc(cc1)C#N)n1cncn1                                                                 | 78.29  | 2.93  | + |
| Levamisole          | C1CN2CC(N=C2S1)c1ccccc1                                                                               | 40.62  | 1.45  | + |
| Levetiracetam       | CCC(N1CCCC1=O)C(N)=O                                                                                  | 63.33  | 4.03  | + |
| Levomopromazine     | COc1ccc2Sc3ccccc3N(C(C)CN(C)C)c2c1                                                                    | 40.90  | 1.06  | + |
| Levonorgestrel      | CCC12CC3C(CCC4=CC(=O)CCC34)C1CCC2(O)C#C                                                               | 37.30  | 3.96  | + |
| Levoprotiline       | CNCC(O)CC12CCC(c3ccccc13)c1ccccc21                                                                    | 32.26  | 3.18  | + |
| Levosimendan        | CC1CC(=O)NN=C1c1ccc(NN=C(C#N)C#N)cc1                                                                  | 112.27 | 0.96  | + |
| Lidocaine           | CCN(CC)CC(=O)Nc1c(Cl)cccc1C                                                                           | 32.34  | 2.39  | + |
| Lincomycin          | CCCC1CC(N(C)C1)C(=O)NC(C(C)O)C1OC(SC(C)O)C(O)C1O                                                      | 147.79 | -1.24 | - |
| Linezolid           | CC(=O)NCC1CN(C(=O)O)1c1ccc(N2CCOC2)c(F)c1                                                             | 71.00  | 1.67  | + |
| Liothyronine        | NC(Cc1cc(Cl)c(O)c2ccc(O)c(Cl)c2)c1c1)C(O)=O                                                           | 91.76  | 0.10  | + |
| Lisuride            | CCN(CC)C(=O)NC1CN(C)C2Cc3c[nH]c4cccc(C2=C1)c34                                                        | 50.80  | 2.30  | + |
| Lofexidine          | CC(Oc1c(Cl)cccc1Cl)C1=NCCN1                                                                           | 33.62  | 2.00  | + |
| Lomefloxacin        | CCn1cc(C(O)=O)c(=O)c2cc(F)c(N3CCNC(C)C3)c(F)c12                                                       | 74.29  | 2.64  | + |
| Lomustine           | C1CCN(N=O)C(=O)NC1CCCCC1                                                                              | 61.77  | 1.16  | + |
| Lorazepam           | OC1=N=C(c2ccccc2Cl)c2cc(Cl)ccc2NC1=O                                                                  | 61.44  | 1.53  | + |
| Lorcainide          | CC(C)N1CCC(CC1)N(C(=O)O)C1c1ccccc1c1ccc(Cl)cc1                                                        | 23.55  | 4.41  | + |
| Lormetazepam        | CN1c2ccc(Cl)cc2C(=NC(O)C1=O)c1ccccc1Cl                                                                | 52.81  | 1.08  | + |
| Lornoxicam          | CN1C(C(=O)Nc2ccccc2)=C(O)c2sc(Cl)cc2S1(=O)=O                                                          | 135.45 | 1.34  | + |
| Lovastatin          | CCC(C)C(=O)OC1CC(C)C=C2C=CC(C)C(CCC3CC(O)CC(=O)O3)C12                                                 | 72.72  | 0.83  | + |
| Loxiglumide         | CCCCCN(CCCOC)C(=O)C(CCC(O)=O)NC(=O)c1ccc(Cl)c(Cl)c1                                                   | 95.94  | 2.61  | + |
| Loxoprofen          | CC(C(O)=O)c1ccc(CC2CCCC2=O)cc1                                                                        | 54.35  | 1.68  | + |
| Lynestrolone        | CC12CCC3C(CCC4=CCCCC34)C1CCC2(O)C#C                                                                   | 20.23  | 4.39  | + |
| Maprotiline         | CNCCC12CCC(c3ccccc13)c1ccccc21                                                                        | 12.03  | 4.21  | + |
| Mazindol            | OC1(N2CCN=C2c2ccccc12)c1ccc(Cl)cc1                                                                    | 35.83  | 1.74  | + |
| Mebeverine          | CCN(CCCOC(=O)c1ccc(OC)c(OC)c1)C(C)Cc1ccc(OC)cc1                                                       | 57.08  | 5.12  | + |
| Meclofenamic_Acid   | Cc1ccc(Cl)c(Nc2ccccc2C(O)=O)c1Cl                                                                      | 49.33  | 4.36  | + |
| Mefenamic_Acid      | Cc1ccc(Nc2ccccc2C(O)=O)c1C                                                                            | 49.33  | 4.74  | + |
| Melagatran          | NC(=N)c1ccc(CNC(=O)C2CCN2C(=O)C(NCC(O)=O)C2CCCCC2)cc1                                                 | 148.61 | 0.28  | - |
| Meloxicam           | CN1C(C(=O)Nc2ncc(C)s2)=C(O)c2ccccc2S1(=O)=O                                                           | 136.22 | 2.81  | + |
| Meperidine          | CCOC(=O)C1(CCN(C)CC1)c1ccccc1                                                                         | 29.54  | 1.83  | + |
| Mepindolol          | CC(C)NCC(O)COc1ccc2[nH]c(Cl)c2cc12                                                                    | 57.23  | 4.60  | + |
| Meptazinol          | CCC1(CCCCN(C)C1)c1ccc(O)c1                                                                            | 23.47  | 2.77  | + |
| Mercaptopurine      | S=c1nc[nH]c2[nH]cnc12                                                                                 | 89.34  | 0.61  | + |
| Meropenem           | CC(O)C1C2C(C)C(SC3CCC(N3)C(=O)N(C)C)=C(N2C1=O)C(O)=O                                                  | 135.48 | -0.72 | - |
| Mesalamine          | Nc1ccc(O)c(c1)C(O)=O                                                                                  | 83.18  | 3.47  | + |
| Mesna               | OS(=O)(=O)CCS                                                                                         | 101.45 | 2.77  | + |
| Mestranol           | COc1ccc2C3CC4(C)C(CCC4(O)C#C)C3CCc2c1                                                                 | 29.46  | 4.00  | + |
| Metaproterenol      | CC(C)NCC(O)c1cc(O)cc(O)c1                                                                             | 72.60  | 1.70  | + |
| Methadone           | CCC(=O)C(C)C(C)N(C)C1c1ccccc1c1ccccc1                                                                 | 20.31  | 4.29  | + |
| Methimazole         | Cn1cc[nH]c1=S                                                                                         | 52.60  | 4.68  | + |
| Methocarbamol       | COc1ccccc1OCC(O)COC(N)=O                                                                              | 90.93  | 3.91  | + |
| Methoxyamphetamine  | COc1ccccc1CC(C)N)c1                                                                                   | 35.25  | 1.58  | + |
| Methsuximide        | CN1C(=O)CC(C)C1=O)c1ccccc1                                                                            | 37.38  | 0.95  | + |
| Methylergonovine    | CCC(CO)NC(=O)C1CN(C)C2Cc3c[nH]c4cccc(C2=C1)c34                                                        | 68.25  | 1.56  | + |
| Methylphenidate     | COC(=O)C1(C)CCCN1)c1ccccc1                                                                            | 38.33  | 1.70  | + |
| Methylphenobarbital | CCC1(C(=O)NC(=O)N(C)C1=O)c1ccccc1                                                                     | 66.40  | 3.26  | + |
| Methylscopolamine   | C[N+](1)C2CC(C)C1C1OC21)OC(=O)C(CO)c1ccccc1                                                           | 59.06  | 0.68  | - |
| Metoclopramide      | CCN(CC)CCNC(=O)c1cc(Cl)c(N)cc1OC                                                                      | 67.51  | 3.61  | + |
| Metolazone          | CC1Nc2ccc(Cl)c(cc2C(=O)N1c1ccccc1S(N)(=O)=O                                                           | 100.88 | 2.78  | + |
| Metoprolol          | COCCc1ccc(OCC(O)CNC(C)C)cc1                                                                           | 50.72  | 2.33  | + |
| Metronidazole       | Cc1ncc(n1CCO)[N+](=O)=O                                                                               | 87.46  | 0.32  | + |
| Metypapone          | CC(C)C(=O)c1ccncc1)c1ccncc1                                                                           | 42.85  | 0.07  | + |
| Mexiletine          | CC(N)COc1c(Cl)ccccc1C                                                                                 | 35.25  | 2.03  | + |
| Mezocillin          | CC1(C)SC2C(NC(=O)C)NC(=O)N3CCN(C3=O)S(C)C(=O)O)c3ccccc3)C(=O)N2C1C(O)=                                | 207.18 | -0.62 | - |

|                      | O                                                                                                                                                                            |        |       |   |
|----------------------|------------------------------------------------------------------------------------------------------------------------------------------------------------------------------|--------|-------|---|
| Mianserin            | CN1CCN2C(C1)c1cccc1Cc1cccc21                                                                                                                                                 | 6.48   | 2.00  | + |
| Mibefradil           | CCG(=O)OC1(CCN(C)CCc2nc3cccc3[nH]2)CCc2cc(F)ccc2C1C(C)C                                                                                                                      | 58.20  | -0.22 | + |
| Miconazole           | C1c1ccc(COC(Cn2cnc2)c2ccc(Cl)cc2C1)c(Cl)c1                                                                                                                                   | 27.05  | 5.98  | + |
| Mifepristone         | CN(C)c1ccc(cc1)C1C2C(C)C(CCC2(O)#C)C2CCC3CC(=O)OCCC3=C12                                                                                                                     | 40.54  | 2.16  | + |
| Mifobate             | COP(=O)(CC(c1ccc(Cl)cc1)P(=O)(OC)OC)OC                                                                                                                                       | 90.65  | 0.84  | + |
| Miglustat            | CCCCN1CC(O)C(O)C1CO                                                                                                                                                          | 84.09  | 2.40  | + |
| Milnacipran          | CCN(CC)C(=O)C1(CC1CN)c1cccc1                                                                                                                                                 | 46.33  | 2.79  | + |
| Milrinone            | Cc1[nH]c(=O)c(cc1-c1cnc1)C#N                                                                                                                                                 | 69.26  | 2.43  | + |
| Minocycline          | CN(C)C1C2C3C4c(ccc(O)C4(=O)C3=C(O)C2(O)C(=O)C(CN)=O)C1O(N)C                                                                                                                  | 163.74 | 2.66  | + |
| Minoxidil            | Nc1nc(cc[n+][O-])N1CCCC1                                                                                                                                                     | 67.16  | 1.27  | + |
| Mirtazapine          | CN1CCN2C(C1)c1cccc1Cc1cccc21                                                                                                                                                 | 19.37  | 1.39  | + |
| Misoprostol          | CCCC(C)OCC=CC1C(O)CC(=O)C1CCCCCCC(=O)OC                                                                                                                                      | 83.80  | 1.58  | + |
| Mivacurium           | COc1cc2CC[N+](C)(CCOC(=O)CCC=CCC(=O)OCC[N+](3)C)CCc4cc(OC)c(OC)ccc4<br>C3Cc3cc(OC)c(OC)c(OC)c3(Cc3cc(OC)c(OC)c(OC)c3)c2cc1OC                                                 | 144.90 | 7.62  | - |
| Moclobemide          | C1c1ccc(cc1)C(=O)NCCN1CCOCC1                                                                                                                                                 | 41.57  | 1.04  | + |
| Modafinil            | NC(=O)CS(=O)C(c1cccc1)c1cccc1                                                                                                                                                | 79.18  | 1.59  | + |
| Moisidomine          | COCC(=O)Nc1c[n+](no1)N1CCOCC1                                                                                                                                                | 81.70  | 2.60  | + |
| Moricizine           | CCOC(=O)Nc1ccc2Sc3cccc3N(C(=O)CCN3CCOCC3)c2c1                                                                                                                                | 96.41  | 0.25  | + |
| Moxalactam           | COc1(NC(=O)C(C(O)=O)c2ccc(O)cc2)C2OCC(CSc3nnnn3C)=C(N2C1=O)C(O)=O                                                                                                            | 231.60 | -1.51 | - |
| Moxifloxacin         | COc1c2C(NC3CC3)C=C(C(O)=O)C(=O)C2cc(F)c1N1CC2CCNC2C1                                                                                                                         | 90.68  | 4.03  | + |
| Moxisylyte           | CC(C)c1cc(OC)C(=O)C(C)CCN(C)C                                                                                                                                                | 38.77  | 1.55  | + |
| Moxonidine           | COc1nc(Cnc(C)c1)N1=CCN1                                                                                                                                                      | 71.11  | 0.78  | + |
| Mycophenolic_Acid    | COc1c(C)c2COC(=O)c2c(O)c1CC=C(C)CCC(O)=O                                                                                                                                     | 93.06  | 2.69  | + |
| N_Acetylprocainamide | CCN(CC)CCNC(=O)c1ccc(NC(C)=O)cc1                                                                                                                                             | 61.36  | 1.16  | + |
| Nabumetone           | COc1ccc2cc(CCC(C)=O)ccc2c1                                                                                                                                                   | 26.30  | 3.37  | + |
| Nafarelin            | CC(C)CC(NC(=O)C(Cc1ccc2ccc2c1)NC(=O)C(Cc1ccc(O)cc1)NC(=O)CO)NC(=O)C<br>Cc1[nH]c2cccc12)NC(=O)C(Cc1c[nH]cn1)NC(=O)C1CCC(=O)N1C(=O)N(C)CCNC(N<br>)=N(C(=O)N1CCCC1C(=O)NCC(N)=O | 472.13 | -2.17 | - |
| Nafonyl              | CCN(CC)CCOC(=O)C(C)CC1CCO1C1Cc1ccc2ccc2cc1                                                                                                                                   | 38.77  | 2.98  | + |
| Nalidixic_Acid       | CCN1CC(C(O)=O)C(=O)c2ccc(C)nc12                                                                                                                                              | 70.18  | 2.45  | + |
| Naloxone             | Oc1ccc2CC3N(C=C)CC45C(Oc1c24)C(=O)CC35O                                                                                                                                      | 69.97  | 0.64  | + |
| Naltrexone           | Oc1ccc2CC3N(C4C4)CC45C(Oc1c24)C(=O)CC35O                                                                                                                                     | 70.00  | 0.92  | + |
| Naproxen             | COc1ccc2cc(ccc2c1)C(C)C(O)=O                                                                                                                                                 | 46.53  | 3.57  | + |
| Naratriptan          | CNS(=O)(=O)CCc1ccc2[nH]c(cc2c1)C1CCN(C)CC1                                                                                                                                   | 73.18  | 5.10  | + |
| Nateglinide          | CC(C)C1CC(C)C1C(=O)NC(Cc1cccc1)C(O)=O                                                                                                                                        | 66.40  | 5.10  | + |
| Nedocromil           | CCc1c2oc(cc1=O)c2cc2c1n(Cc1cc2=O)C(O)=O                                                                                                                                      | 126.81 | 2.48  | - |
| Nefazodone           | CCc1nn(CCCN2CCN(C2)c2ccc(Cl)cc2)c(O)n1CCOc1cccc1                                                                                                                             | 55.25  | 2.80  | + |
| Nefopam              | CN1CCOC(c2ccc2)c2ccc2c1                                                                                                                                                      | 12.47  | 2.38  | + |
| Neomycin             | NCC1OC(COC2C(CO)OC(C3C(O)C(N)CC(N)C3OC3OC(CN)C(O)C(O)C3N)C2O)C(N)C(O)C1O                                                                                                     | 353.11 | -8.85 | - |
| Netilmicin           | CCNC1CC(N)C(OC2CC(N)C=C(CN)O2)C(O)C1OC1OCC(C)(O)C(NC)C1O                                                                                                                     | 199.73 | -3.20 | - |
| Netivudine           | CC#Cc1cn(C2OC(CO)C(O)C2O)c(=O)[nH]c1=O                                                                                                                                       | 124.78 | -2.73 | - |
| Nevirapine           | Cc1cnc2n(C3CC3)c3ncccc3c(=O)[nH]c12                                                                                                                                          | 63.40  | -0.51 | + |
| Niacin               | OC(=O)c1cccc1                                                                                                                                                                | 50.16  | 1.94  | + |
| Nicorandil           | [O-][N+](=O)OCCNC(=O)c1cccc1                                                                                                                                                 | 100.88 | 2.84  | + |
| Nicotine             | CN1CCCC1c1cccnc1                                                                                                                                                             | 16.13  | 1.14  | + |
| Nilutamide           | CC1(C)NC(=O)N(C1=O)c1ccc(cc1)C(F)(F)F)[N+](O)=O                                                                                                                              | 98.79  | 2.19  | + |
| Nimodipine           | COCCOC(=O)C1=C(C)NC(C)=C(C1c1cccc(c1)[N+](O)=O)C(=O)OC(C)C                                                                                                                   | 122.91 | 0.67  | + |
| Nisoldipine          | COCC(=O)C1=C(C)NC(C)=C(C1c1cccc1)[N+](O)=O)C(=O)OC(C)C                                                                                                                       | 113.43 | 0.41  | + |
| Nitisinone           | [O-][N+](=O)c1ccc(cc1C(=O)C1C(=O)CC1=O)C(F)(F)F                                                                                                                              | 100.59 | -1.39 | + |
| Nitrazepam           | [O-][N+](=O)c1ccc2NC(=O)CN=C(c3cccc3)c2c1                                                                                                                                    | 91.12  | 2.50  | + |
| Nitroxoline          | Oc1ccc([N+](O)=O)c2cccnc12                                                                                                                                                   | 82.69  | 4.94  | + |
| Nomifensine          | CN1CC(c2ccc2)c2ccc(N)cc2C1                                                                                                                                                   | 29.26  | 2.32  | + |
| Norethindrone        | CC12CCC3C(CCC4=CC(=O)CCC34)C1CCC2(O)C#C                                                                                                                                      | 37.30  | 3.57  | + |
| Norfenfluramine      | CC(N)Cc1cccc(c1)C(F)F                                                                                                                                                        | 26.02  | 3.75  | + |
| Norgestrel           | CCC12C=CC3C(CCC4=CC(=O)CCC34)C1CCC2(O)C#C                                                                                                                                    | 37.30  | 3.74  | + |
| Nortriptyline        | CNCCC=C1c2ccc2CCc2ccc12                                                                                                                                                      | 12.03  | 3.83  | + |
| Octreotide           | CC(O)C(CO)NC(=O)C1CSSC(NC(=O)C(N)Cc2ccc2)C(=O)NC(Cc2ccc2)C(=O)NC(Cc2[nH]c3cccc23)C(=O)NC(CCCCN)C(=O)NC(C(C)O)C(=O)N1<br>CC1COC2c(N3CCN(C)CC3)c(F)cc3c2n1cc(C2)O)c3=O         | 382.82 | -2.71 | - |
| Ofloxacin            | CC1COC2c(N3CCN(C)CC3)c(F)cc3c2n1cc(C2)O)c3=O                                                                                                                                 | 74.60  | 3.06  | + |
| Olisalazine          | OC(=O)c1ccc(cc1O)N=Nc1ccc(O)c(c1)C(O)=O                                                                                                                                      | 139.78 | 2.91  | - |
| Omeprazole           | COc1ccc2[nH]c(nc2c1)S(=O)Cc1ncc(C)c(OC)c1C                                                                                                                                   | 95.94  | 4.01  | + |
| Ondansetron          | Cn1c2CC(Cn3ccnc3)C(=O)c2c2ccc12                                                                                                                                              | 39.72  | 1.07  | + |
| Orlistat             | CCCCCCCCCCC(CC1OC(=O)C1CCCC)OC(=O)C(CC(C)C)NC=O                                                                                                                              | 81.70  | 6.88  | - |
| Orphenadrine         | CN(C)CCOC(c1cccnc1)c1cccnc1C                                                                                                                                                 | 12.47  | 3.34  | + |
| Oxamniquine          | CC(C)NCC1CCc2cc(CO)c(cc2N1)[N+](O)=O                                                                                                                                         | 93.59  | 2.78  | + |
| Oxandrolone          | CC1(O)CCC2C3CC4CG(=O)CCC4(C)C3CCC12C                                                                                                                                         | 46.53  | 3.04  | + |
| Oxaprozin            | OC(=O)CCc1nc(cc1O)c1cccc1-c1cccc1                                                                                                                                            | 63.32  | 0.84  | + |
| Oxatamide            | O=c1[nH]c2ccc2n1CCCN1CCN(C1)C(c1cccc1)c1cccc1                                                                                                                                | 43.07  | 2.74  | + |
| Oxazepam             | OC1N=C(c2ccc2)c2cc(C)ccc2NC1=O                                                                                                                                               | 61.69  | 2.15  | + |
| Oxcarbazepine        | NC(=O)N1c2ccc2CC(=N)c2ccc12                                                                                                                                                  | 70.00  | 1.08  | + |
| Oxitropium           | CC[N+](C)C2CC(C1C1OC21)OC(=O)C(O)c1cccc1                                                                                                                                     | 59.06  | 1.07  | - |
| Oxprenolol           | CC(C)NCC(O)COc1cccc1OCC=C                                                                                                                                                    | 50.72  | 1.61  | + |
| Oxybutynin           | CCN(CC)CC#CCOC(=O)C(O)C1CXXXXC1c1cccc1                                                                                                                                       | 49.77  | 5.18  | + |
| Oxycodone            | COc1ccc2CC3N(C)CC45C(Oc1c24)C(=O)CCC35O                                                                                                                                      | 58.86  | 2.00  | + |
| Oxyfedrine           | COc1ccc(c1)C(=O)CCNC(C)C(O)c1cccc1                                                                                                                                           | 58.36  | 1.35  | + |
| Oxyphenbutazone      | CCCCC1C(=O)N(N(C1=O)c1ccc(O)cc1)c1cccc1                                                                                                                                      | 60.77  | 4.70  | + |
| Palonosetron         | O=C1N(C2CC3CCc3ccc1c23)C1CN2CCC1CC2                                                                                                                                          | 23.55  | 1.89  | + |
| Pamidronic_Acid      | NCCC(O)(P(O)(O)=O)P(O)(O)=O                                                                                                                                                  | 180.93 | -1.66 | - |
| Pancuronium          | CC(=O)OC1C(C2C3CC4CC(OC(C)=O)C(C4)C3CCC12C)[N+](1)C)CCCC1                                                                                                                    | 52.60  | 5.35  | - |
| Pantoprazole         | COc1cnc(CS(=O)c2nc3cc(OC(F)F)ccc3[nH]2)c1OC                                                                                                                                  | 104.70 | 4.71  | + |
| Papaverine           | COc1ccc(Cc2ncc3cc(OC)c(OC)cc23)cc1OC                                                                                                                                         | 49.77  | 3.31  | + |
| Paricalcitol         | CC(C=CC(C)C(C)O)C1CCC2C(CCC12C)=CC=C1CC(O)CC(O)C1                                                                                                                            | 60.69  | 5.70  | + |
| Paromomycin          | NCC1OC(OC2C(CO)OC(C3C(O)C(N)CC(N)C3OC3OC(CO)C(O)C(O)C3N)C2O)C(N)C(O)C1O                                                                                                      | 347.32 | -8.86 | - |
| Paroxetine           | Fc1ccc(cc1)C1CCNCC1COc1ccc2OCCc2c1                                                                                                                                           | 38.91  | 2.70  | + |
| Pefloxacin           | CCn1cc(C(O)=O)c(=O)c2cc(F)c(cc12)N1CCN(C)CC1                                                                                                                                 | 64.79  | 2.75  | + |
| Pelirone             | Cc1nc(NCC2cnc2)c(C#N)c(=O)[nH]1                                                                                                                                              | 93.95  | 1.50  | + |
| Penbutolol           | CC(C)C(NCC(O)C)OCC1c1cccc1C1CCCC1                                                                                                                                            | 41.49  | 2.15  | + |
| Penciclovir          | Nc1nc(=O)c2ncc(CCC(CO)CO)c2[nH]1                                                                                                                                             | 130.05 | -1.30 | - |
| Penicillin_G         | CC1(C)SC2C(CC(=O)Cc3cccc3)C(=O)N2C1C(O)=O                                                                                                                                    | 99.88  | 1.89  | + |
| Penicillin_V         | CC1(C)SC2C(NC(=O)COc3cccc3)C(=O)N2C1C(O)=O                                                                                                                                   | 119.26 | 2.11  | + |
| Pentamidine          | NC(=N)c1ccc(OCCCOCc2ccc(cc2)C(N)=N)cc1                                                                                                                                       | 118.20 | 2.88  | - |
| Pentazocine          | CC1C2Cc3ccc(O)cc3C1(C)CCN2CC=C(C)C                                                                                                                                           | 23.47  | 3.50  | + |
| Pentobarbital        | CCCC(C)C1(C)C(C)C(=O)NC1=O                                                                                                                                                   | 75.17  | 2.46  | + |
| Pentoxifylline       | CC(=O)CCCNC1c(=O)n(C)c2ncc(C)c2c1=O                                                                                                                                          | 78.87  | 4.51  | + |
| Perhexiline          | C(C1CCCC1)C1CCCCC1C1CCCCC1                                                                                                                                                   | 12.03  | 4.91  | + |
| Perphenazine         | OCCN1CCN(CCCN2c3cccc3Sc3ccc(Cl)cc23)CC1                                                                                                                                      | 55.13  | 4.22  | + |
| Phenacemide          | NC(=O)N(C=O)Cc1cccc1                                                                                                                                                         | 72.19  | 0.98  | + |



|                       |                                                                                                                   |        |       |   |
|-----------------------|-------------------------------------------------------------------------------------------------------------------|--------|-------|---|
| Phenazopyridine       | Nc1ccc(N=Nc2ccccc2)c(N)n1                                                                                         | 89.45  | 1.02  | + |
| Phencyclidine         | C1CCN(CC1)C1(CCCCC1)c1ccccc1                                                                                      | 3.24   | 3.84  | + |
| Phenglutarimide       | CCN(CC)CCC1(CCC(=O)NC1=O)c1ccccc1                                                                                 | 49.33  | 3.75  | + |
| Phenindione           | O=C1C(C(=O)c2ccccc12)c1ccccc1                                                                                     | 34.14  | 2.85  | + |
| Pheniramine           | CN(C)CCC(c1ccccc1)c1ccccc1                                                                                        | 16.13  | 3.17  | + |
| Phenprocoumon         | CCC(c1ccccc1)c1c(O)c2ccccc2oc1=O                                                                                  | 50.44  | 5.46  | + |
| Phensuximide          | CN1C(=O)CC(C1=O)c1ccccc1                                                                                          | 37.38  | 0.78  | + |
| Phenylbutazone        | C1CCCN1N(C(=O)C1=O)c1ccccc1c1ccccc1                                                                               | 40.62  | 3.19  | + |
| Phenylethylmalonamide | CCC(C(N)=O)(C(N)=O)c1ccccc1                                                                                       | 86.05  | 3.41  | + |
| Phenylpropranolamine  | CC(N)C(O)c1ccccc1                                                                                                 | 46.17  | 0.07  | + |
| Phenytol              | O=C1NCC(=O)C1(c1ccccc1)c1ccccc1                                                                                   | 58.20  | 3.43  | + |
| Phthalylsulfathiazole | OC(=O)c1ccccc1C(=O)Nc1ccc(cc1)S(=O)(=O)Nc1nccs1                                                                   | 162.08 | 3.59  | - |
| Physostigmine         | CNC(=O)Oc1ccc2N(C)C3N(C)CCC3(C)c2c1                                                                               | 44.81  | 3.53  | + |
| Pimozide              | Fc1ccc(cc1)C(CCN1CCC(CC1)n1c2ccccc2[nH]c1=O)c1ccc(F)cc1                                                           | 41.01  | 4.11  | + |
| Pindolol              | CC(C)NCC(O)COc1ccc2[nH]ccc12                                                                                      | 57.28  | 2.21  | + |
| Pioglitazone          | CCc1ccc(CCOc2ccc(Cc3SC(=O)NC3=O)cc2)nc1                                                                           | 93.46  | 2.36  | + |
| Pipemidic_Acid        | CCn1cc(C(O)=O)c(O)c2cnc(nc12)N1CCNCC1                                                                             | 99.98  | 1.57  | + |
| Piperacillin          | CCN1CCN(C(=O)NC(C(=O)NC2C3SC(C)C(C)C(N3C2=O)C(O)=O)c2ccccc2)C(=O)C1=O                                             | 181.73 | -1.71 | - |
| Pirazolac             | OC(=O)Cc1nn(cc1-c1ccc(Cl)cc1)-c1ccc(F)cc1                                                                         | 55.12  | 3.22  | + |
| Pirbuterol            | CC(C)C(NCC(O)c1ccc(O)c(CO)n1                                                                                      | 85.49  | 1.00  | + |
| Piretanide            | NS(=O)(=O)c1cc(cc(N2C(CCC2)c1O)c1ccccc1)C(O)=O                                                                    | 118.21 | 0.85  | + |
| Pirfenol              | CC1CCCC(C)N1CCCC(O)(c1ccccc1)c1ccccc1                                                                             | 36.36  | 3.87  | + |
| Piroxicam             | CN1C(C(=O)Nc2ccccc2)=C(O)c2ccccc2S1(=O)=O                                                                         | 107.88 | -0.60 | + |
| Piroximone            | CCc1[nH]c(O)[nH]c1c(O)c1ccccc1                                                                                    | 78.29  | 2.66  | + |
| Pizotyline            | CN1CCC(CC1)=C1c2ccccc2CCc2ccccc12                                                                                 | 31.48  | 3.99  | + |
| Poldine               | C[N+](1)C)CCCC1COC(=O)C(O)(c1ccccc1)c1ccccc1                                                                      | 46.53  | 2.22  | - |
| Polythiazide          | CN1C(CSCC(F)F)F)Nc2cc(Cl)c(cc2S1(=O)=O)S(N)(=O)=O                                                                 | 149.31 | 0.11  | + |
| Pomalidomide          | Nc1ccc2C(=O)N(C3CCC(=O)NC3=O)C(=O)c1c2                                                                            | 108.71 | 2.41  | + |
| Posaconazole          | C1CC(C(C)O)n1nch(-c2ccc(cc2)N2CCN(CC2)c2ccc(OCC3COC(Cn4cncn4)(C3)c3ccc(F)cc3F)cc2)c1=O                            | 115.67 | -0.35 | + |
| Practolol             | CC(C)NCC(O)c1ccc(NC(C)=O)cc1                                                                                      | 61.09  | 3.84  | + |
| Pralidoxime           | C[n+](1)ccccc1C=NO                                                                                                | 37.52  | 1.11  | + |
| Pramipexole           | CCCN1CCc2nc(N)sc2C1                                                                                               | 78.89  | 0.19  | + |
| Pranlukast            | O=C(Nc1ccccc2c1cc(cc2=O)-c1nn[nH]1)c1ccc(OCCCc2ccccc2)cc1                                                         | 123.00 | 4.44  | - |
| Praziquantel          | O=C(C1CCCC1)N1CC2N(Cc3ccccc3)C(=O)C1                                                                              | 40.62  | 2.82  | + |
| Pregabalin            | CC(C)CC(CN)CC(O)=O                                                                                                | 62.83  | 1.99  | + |
| Primidone             | CCC1(C(=O)NCNC1=O)c1ccccc1                                                                                        | 58.20  | 0.37  | + |
| Probenecid            | CCCN(CCC)S(=O)(=O)c1ccc(cc1)C(O)=O                                                                                | 82.78  | 2.26  | + |
| Probuco               | CC(C)(Sc1ccc(O)c(c1)C(C)C(C)C(C)C)Sc1ccc(O)c(c1)C(C)C(C)C(C)C(C)C                                                 | 91.06  | 9.91  | - |
| Procaïnamide          | CCN(CC)CCNC(=O)c1ccc(N)cc1                                                                                        | 58.28  | 2.68  | + |
| Procarbazine          | CNNCc1ccc(cc1)C(=O)NC(C)C                                                                                         | 53.09  | 4.16  | + |
| Procyclidine          | OC(CCN1CCCC1)(C1CCCCC1)c1ccccc1                                                                                   | 23.47  | 3.45  | + |
| Progesterone          | CC(O)C1CCC2C3CCC4=CC(=O)CCC4(C)C3CC12C                                                                            | 34.14  | 4.72  | + |
| Promethazine          | CC(CN1c2ccccc2Sc2ccccc12)N(C)C                                                                                    | 31.78  | 3.86  | + |
| Propafenone           | CCNCC(O)COc1ccccc1C(=O)CCc1ccccc1                                                                                 | 58.56  | 2.66  | + |
| Propofol              | CC(C)c1ccc(C(C)C)c1O                                                                                              | 20.23  | 3.64  | + |
| Propoxyphene          | CCC(=O)OC(Cc1ccccc1)(C(C)C)N(C)C)c1ccccc1                                                                         | 29.54  | 4.17  | + |
| Propylthiouracil      | CCc1ccc(O)[nH]c(S)[nH]1                                                                                           | 80.67  | 2.62  | + |
| Prothionamide         | CCc1ccc(ccn1)C(N)=S                                                                                               | 71.00  | 1.28  | + |
| Protriptyline         | CNCCC1c2ccccc2C=Cc2ccccc12                                                                                        | 12.03  | 4.08  | + |
| Pseudoephedrine       | CNC(C)C(O)c1ccccc1                                                                                                | 32.26  | 1.00  | + |
| Pyrazinamide          | NC(=O)c1ncccn1                                                                                                    | 68.82  | 3.64  | + |
| Pyridostigmine        | CN(C)C(=O)Oc1ccc[n+](C)c1                                                                                         | 34.47  | 1.37  | - |
| Pyrimethamine         | CCc1nc(N)nc(N)c1-c1ccc(Cl)cc1                                                                                     | 77.76  | 4.48  | + |
| Quinagolide           | CCCN1CC(C2C2C3c(O)cccc3CC12)NS(=O)(=O)N(CC)CC                                                                     | 80.74  | 1.39  | + |
| Quinalbarbitone       | C1CC(C)C1(C=C)C(=O)NC1=O                                                                                          | 61.69  | 1.50  | + |
| Quinaprilat           | CC(NC(Cc1ccccc1)C(O)=O)C(=O)N1Cc2ccccc2CC1C(O)=O                                                                  | 106.60 | 2.26  | + |
| Quinine               | COc1ccc2nccc(C(O)C3CC4CCN3CC4=C)C2c1                                                                              | 45.40  | 3.09  | + |
| Rabeprazole           | COCCCOc1ccccc(CS(=O)c2nc3ccccc3[nH]2)c1C                                                                          | 96.31  | 3.61  | + |
| Raloxifene            | Oc1ccc(cc1)-c1sc2cc(O)ccc2c1C(=O)c1ccc(OCCN2CCCCC2)cc1                                                            | 97.49  | 1.56  | + |
| Ramelteon             | CCC(=O)NCCC1CCc2ccc3OCCc3c12                                                                                      | 38.33  | 2.57  | + |
| Reboxetine            | CCOc1ccccc1OC(C1CNCCO1)c1ccccc1                                                                                   | 39.72  | 3.37  | + |
| Recainam              | CC(C)NCCNC(=O)Nc1c(C)cccc1C                                                                                       | 53.16  | 0.90  | + |
| Remoxipride           | CCN1CCCC1CN(C(=O)c1c(O)ccc(Br)c1)OC                                                                               | 50.72  | 1.99  | + |
| Repaglinide           | CCOc1cc(Cc(=O)NC(C(C)C)c2ccccc2N2CCCCC2)ccc1C(O)=O                                                                | 78.76  | 4.58  | + |
| Reproterol            | Cn1c2nch(CCCNCC(O)c3cc(O)cc(O)c3)c2c(=O)n(C)c1=O                                                                  | 134.22 | 2.09  | + |
| Rifabutin             | COC1=C(COC2(C)OC3c(C2=O)c2C4=NC5(CCN(C(C)C)CC5)NC4=C(NC(=O)C(C)=CC=CC(C)C)C(C)C(O)C(C)C(O)C(C)C(=O)C(=O)c2c(O)c3C | 203.06 | 2.22  | + |
| Rilpivirine           | Cc1cc(C=C)N)cc(C)c1Nc1cnc(Nc2ccc(cc2)C#N)n1                                                                       | 97.05  | 0.01  | + |
| Rimiterol             | OC(C1CCCC1)c1ccc(O)c(O)c1                                                                                         | 72.72  | 0.80  | + |
| Ritodrine             | CC(NCCc1ccc(O)cc1)C(O)c1ccc(O)cc1                                                                                 | 72.72  | 0.57  | + |
| Rivastigmine          | CCN(C)C(=O)Oc1ccc(c1)C(C)N(C)C                                                                                    | 32.78  | 2.44  | + |
| Rizatriptan           | CN(C)CCc1c[nH]c2ccc(Cn3cncn3)cc12                                                                                 | 49.69  | 1.07  | + |
| Rofecoxib             | CS(=O)(=O)c1ccc(cc1)C1=C(C(=O)OC1)c1ccccc1                                                                        | 68.53  | 2.97  | + |
| Ropinirole            | CCCN(Cc1ccccc1)N(C)C1=O                                                                                           | 53.16  | 2.62  | + |
| Roquinimex            | CN(C(=O)c1c(O)c2ccccc2n(C)c1=O)c1ccccc1                                                                           | 62.40  | 2.14  | + |
| Rosiglitazone         | CN(CCOc1ccc(Cc2SC(=O)NC2=O)cc1)c1ccccc1                                                                           | 96.41  | 3.15  | + |
| Rufinamide            | NC(=O)c1cn(Cc2c(F)ccc2F)n1                                                                                        | 73.58  | 2.25  | + |
| Ruxolitinib           | N#CCC(C1CCCC1)n1cc(cc1)-c1ncc2[nH]ccc12                                                                           | 83.14  | 0.97  | + |
| Saccharin             | O=C1NS(=O)(=O)c2ccccc12                                                                                           | 71.43  | -0.13 | + |
| Salbutamol            | CC(C)C(NCC(O)c1ccc(O)c(CO)c1                                                                                      | 72.72  | 2.03  | + |
| Salsalate             | OC(=O)c1ccccc1OC(=O)c1ccccc1O                                                                                     | 83.83  | 3.95  | + |
| Saxagliptin           | NC(C(=O)N1C2CC2CC1C#N)C12CC3CC(C(C)(C3)C1)C2                                                                      | 89.65  | 2.68  | + |
| Scopolamine           | CN1C2CC(C1C1OC21)OC(=O)C(O)c1ccccc1                                                                               | 62.21  | 2.42  | + |
| Selegiline            | CC(Cc1ccccc1)N(C)CC#C                                                                                             | 3.24   | 2.26  | + |
| Sematilide            | CCN(CC)CCNC(=O)c1ccc(NS(C)=O)cc1                                                                                  | 86.89  | 2.33  | + |
| Sibutramine           | CC(C)CC(N(C)C)C1(CCC1)c1ccc(Cl)cc1                                                                                | 3.24   | 4.74  | + |
| Solifenacin           | O=C(OC1CN2CCC1CC2)N1CCc2ccccc2C1c1ccccc1                                                                          | 32.78  | 2.78  | + |
| Stavudine             | Cc1cn(C2OC(CO)C=C2)c(=O)nc1N                                                                                      | 90.35  | 0.78  | + |
| Streptomycin          | CNC1C(O)C(O)C(CO)OC1OC1C(OC2C(O)C(O)C(NC(N)=N)C(O)C2NC(N)=N)OC(C)C1(O)C=O                                         | 331.43 | -7.74 | - |
| Streptozocin          | CN(N=O)C(=O)NC1C(O)OC(CO)C(O)C1O                                                                                  | 151.92 | -2.89 | - |
| Succinylsulfathiazole | OC(=O)CCC(=O)Nc1ccc(cc1)S(=O)(=O)Nc1nccs1                                                                         | 162.08 | 2.45  | - |
| Sudoxicam             | CN1C(C(=O)Nc2nccs2)=C(O)c2ccccc2S1(=O)=O                                                                          | 136.22 | 2.46  | + |
| Sufentanil            | CCC(=O)N(c1ccccc1)C1(COC)CCN(Cc2ccccc2)CC1                                                                        | 60.85  | 2.73  | + |
| Sulbactam             | CC1(C)C(N2C(C2=O)S1(=O)=O)C(O)=O                                                                                  | 100.13 | -0.10 | - |
| Sulfadiazine          | Nc1ccc(cc1)S(=O)(=O)Nc1ncccn1                                                                                     | 105.54 | 4.44  | + |
| Sulfamerazine         | Cc1cnc(NS(=O)(=O)c2ccc(N)cc2)n1                                                                                   | 106.35 | 1.76  | + |
| Sulfamethazine        | Cc1cc(C)nc(NS(=O)(=O)c2ccc(N)cc2)n1                                                                               | 106.35 | 2.07  | + |
| Sulfamethizole        | Cc1nnc(NS(=O)(=O)c2ccc(N)cc2)s1                                                                                   | 134.54 | -0.77 | + |
| Sulfamethoxazole      | Cc1cc(NS(=O)(=O)c2ccc(N)cc2)nc1                                                                                   | 106.35 | 2.37  | + |

|                        |                                                                                                                                                                                                                                                           |        |       |   |
|------------------------|-----------------------------------------------------------------------------------------------------------------------------------------------------------------------------------------------------------------------------------------------------------|--------|-------|---|
| Sulfapyridine          | <chem>Nc1ccc(cc1)S(=O)(=O)Nc1cccc1</chem>                                                                                                                                                                                                                 | 93.46  | 2.69  | + |
| Sulfipyrazone          | <chem>O=C1C(CCS(=O)c2ccccc2)C(=O)N(N1c1cccc1)c1ccccc1</chem>                                                                                                                                                                                              | 76.72  | 3.33  | + |
| Sulfisomidine          | <chem>Cc1cc(NS(=O)=O)c2ccc(N)cc2nc(C)n1</chem>                                                                                                                                                                                                            | 106.35 | 2.37  | + |
| Sulfisoxazole          | <chem>Cc1nsc(NS(=O)=O)c2ccc(N)cc2c1C</chem>                                                                                                                                                                                                               | 121.57 | 3.76  | + |
| Sulindac               | <chem>CC1=C(C(CO)=O)c2cc(F)ccc2C1=Cc1ccc(cc1)S(C)=O</chem>                                                                                                                                                                                                | 73.58  | 2.77  | + |
| Sultopride             | <chem>Cc1ccc(CCN1CCCC1NC(=O)c1ccccc1OC)S(=O)(=O)CC</chem>                                                                                                                                                                                                 | 83.83  | 2.31  | + |
| Sumatriptan            | <chem>CNS(=O)=O)Cc1ccc2[nH]cc(CCN(C)C)c2c1</chem>                                                                                                                                                                                                         | 73.58  | 5.54  | + |
| Suprofen               | <chem>CC(C(=O)c1ccc(cc1)C(=O)c1cccc1</chem>                                                                                                                                                                                                               | 82.33  | 2.62  | + |
| Tacrine                | <chem>Nc1c2CCc2nc2ccccc12</chem>                                                                                                                                                                                                                          | 38.91  | 0.67  | + |
| Tamsulosin             | <chem>CCOC1CCCC1OCCNC(C)C1ccc(OC)c(c1)S(N)=O</chem>                                                                                                                                                                                                       | 108.17 | -2.08 | + |
| Tapentadol             | <chem>CCC(C)CN(C)C)c1cccc(O)c1</chem>                                                                                                                                                                                                                     | 23.47  | 3.08  | + |
| Tegaserod              | <chem>CCCCN=C(N)NCC=C1C=Nc2ccc(CO)cc12</chem>                                                                                                                                                                                                             | 94.80  | 2.41  | + |
| Teichomycin_A2_factor1 | <chem>CCCCC=C(C)C(=O)NC1C(O)C(O)C(CO)OC1Oc1c2Oc3ccc(CC4NC(=O)C(N)c5ccc(O)c(O)c6cc(O)cc(c6)C(NC4=O)C(=O)NC4c(c2)cc1Oc1ccc(cc1Cl)C(OC1OC(CO)C(O)C(O)C1NC(C)=O)C1NC(=O)C(NC4=O)c2ccc(O)c(c2)-c2c(OC4OC(CO)C(O)C(O)C4O)cc(O)cc2C(NC1=O)C(O)=O)c5)cc3Cl</chem> | 662.41 | -3.29 | - |
| Temazepam              | <chem>CN1c2ccc(Cl)cc2C(=NC(O)C1=O)c1ccccc1</chem>                                                                                                                                                                                                         | 52.90  | 2.36  | + |
| Temozolomide           | <chem>Cn1nnc2c(ncn2c1=O)C(N)=O</chem>                                                                                                                                                                                                                     | 107.98 | 2.09  | + |
| Tenidap                | <chem>NC(=O)N1C(=O)C(=O)c2cccs2c2cc(Cl)ccc12</chem>                                                                                                                                                                                                       | 108.57 | 3.61  | + |
| Terazosin              | <chem>CCOc1cc2nc(nc(N)c2cc1OC)N1CCN(CC1)C(=O)C1CCCO1</chem>                                                                                                                                                                                               | 102.29 | 4.07  | + |
| Terbinafine            | <chem>CN(CC=CC#C(C)C)C(C)C1c1ccc2ccccc12</chem>                                                                                                                                                                                                           | 3.24   | 4.81  | + |
| Terlipressin           | <chem>NC(C)C(NC(=O)C1CCCN1C(=O)C1SSCC(NC(=O)CNC(=O)CNC(=O)CN)C(=O)NC(Cc2ccc(O)cc2)C(=O)NC(Cc2ccccc2)C(=O)NC(CCC(N)=O)C(=O)NC(CCN)=O)C(=O)N1)C(=O)NCC(N)=O</chem>                                                                                          | 563.45 | -9.27 | - |
| Terodiline             | <chem>CC(C)C(c1ccccc1)c1ccccc1)NC(C)C(C)C</chem>                                                                                                                                                                                                          | 12.03  | 4.99  | + |
| Tesaglitazar           | <chem>CCOC(Cc1ccc(OCc2ccc(OS(C)=O)=O)cc2)cc1)C(O)=O</chem>                                                                                                                                                                                                | 106.94 | 1.56  | + |
| Testosterone           | <chem>CC12CCC3C(CCC4=CC(=O)C)CCC34C)C1CCC2O</chem>                                                                                                                                                                                                        | 37.30  | 3.88  | + |
| Tetrabenazine          | <chem>COc1cc2CCN3CC(C)C(C)C(=O)CC3c2cc1OC</chem>                                                                                                                                                                                                          | 38.77  | 4.45  | + |
| Thiabendazole          | <chem>c1nc(cs1)-c1nc2ccccc2[nH]1</chem>                                                                                                                                                                                                                   | 69.64  | 0.95  | + |
| Thioridazine           | <chem>CSc1ccc2Sc3ccccc3N(CCC3CCCN3C)c2c1</chem>                                                                                                                                                                                                           | 56.98  | 2.60  | + |
| Tiacrilast             | <chem>CSc1ccc2ncn(C=CC(O)=O)c(O)c2c1</chem>                                                                                                                                                                                                               | 97.42  | 4.88  | + |
| Tiagabine              | <chem>Cc1ccsc1C=C(CCN1CCCC1)C(O)=O)c1sc1c1C</chem>                                                                                                                                                                                                        | 96.83  | 2.11  | + |
| Tianeptine             | <chem>CN1c2ccccc2N(CCC(C)C(O)=O)c2ccc(Cl)cc2S1(=O)=O</chem>                                                                                                                                                                                               | 86.18  | 0.31  | + |
| Tibolone               | <chem>CC1C2=C(C(C)C(=O)C)C2C2CC3(C)C(CCC3O)C#C)C12</chem>                                                                                                                                                                                                 | 37.30  | 3.96  | + |
| Ticagrelor             | <chem>Cc1ccc2nc(NC2CC2c2ccc(F)c(F)c2)cc2nnc(C3CC(OCCO)C(O)C3O)c2n1</chem>                                                                                                                                                                                 | 159.29 | -1.28 | + |
| Ticarcillin            | <chem>CC1(C)SC2C(NC(=O)C(C)C(=O)c3ccsc3)C(=O)N2C1C(O)=O</chem>                                                                                                                                                                                            | 177.55 | 0.17  | - |
| Ticlopidine            | <chem>Clc1ccccc1CN1CCc2sc2c2C1</chem>                                                                                                                                                                                                                     | 31.48  | 3.28  | + |
| Tilidine               | <chem>CCCC(=O)C1(CCC=CC1N(C)C)c1ccccc1</chem>                                                                                                                                                                                                             | 20.31  | 3.57  | + |
| Tiludronic_Acid        | <chem>OP(O)(=O)C(Cc1ccc(Cl)cc1)P(O)(O)=O</chem>                                                                                                                                                                                                           | 134.68 | 1.56  | - |
| Tinidazole             | <chem>CCS(=O)=O)CCn1c(C)nc1[N+](=O)[O-]=O</chem>                                                                                                                                                                                                          | 109.57 | -1.08 | + |
| Tizanidine             | <chem>Clc1ccc2nsc2c1NC1=NCCN1</chem>                                                                                                                                                                                                                      | 90.37  | -0.74 | + |
| Tobramycin             | <chem>NCC1OC(OC2C(N)CC(N)C(OC3OC(CO)C(O)C(N)C3O)C2O)C(N)CC1O</chem>                                                                                                                                                                                       | 268.17 | -6.30 | - |
| Tocainide              | <chem>CC(N)C(=O)Nc1c(C)cccc1C</chem>                                                                                                                                                                                                                      | 55.12  | 4.38  | + |
| Tolazoline             | <chem>C(C1=NCCN1)c1ccccc1</chem>                                                                                                                                                                                                                          | 24.39  | 0.47  | + |
| Toliprolol             | <chem>CC(C)NCC(O)COc1ccc(C)c1</chem>                                                                                                                                                                                                                      | 41.49  | 3.47  | + |
| Tolmesoxide            | <chem>COc1cc(C)c(cc1OC)S(C)=O</chem>                                                                                                                                                                                                                      | 54.70  | -0.09 | + |
| Tolmetin               | <chem>Cc1ccc(cc1)C(=O)c1ccc(CC(O)=O)n1C</chem>                                                                                                                                                                                                            | 59.30  | 2.29  | + |
| Tolrestat              | <chem>COc1ccc2c(ccc2c1)C(F)(F)F)C(=S)N(C)CC(O)=O</chem>                                                                                                                                                                                                   | 81.76  | -0.28 | + |
| Tolterodine            | <chem>CC(C)N(CCC(c1ccccc1)c1cc(C)cc1O)C(C)C</chem>                                                                                                                                                                                                        | 23.47  | 5.34  | + |
| Topiramate             | <chem>CC1(C)OC2COC3(COS(N)=O)=O)OC(C)C)OC3C2O1</chem>                                                                                                                                                                                                     | 123.52 | 3.00  | + |
| Torsemide              | <chem>CC(C)NC(=O)NS(=O)(=O)c1cnc1c1cccc(C)c1</chem>                                                                                                                                                                                                       | 108.53 | 4.80  | + |
| Tramadol               | <chem>COc1ccc(c1)C1(O)CCCC1CN(C)C</chem>                                                                                                                                                                                                                  | 32.70  | 2.53  | + |
| Tranexamic_Acid        | <chem>NCC1CCC(CC1)C(O)=O</chem>                                                                                                                                                                                                                           | 63.32  | 1.08  | + |
| Trapidil               | <chem>CCN(C)C1c1cc(C)nc2nncn12</chem>                                                                                                                                                                                                                     | 46.31  | 2.65  | + |
| Trazodone              | <chem>Clc1ccc(c1)N1CCN(CCCn2nc3ccccc3c2=O)CC1</chem>                                                                                                                                                                                                      | 45.59  | 2.47  | + |
| Treosulfan             | <chem>CS(=O)(=O)OCC(O)C(O)COS(C)=O</chem>                                                                                                                                                                                                                 | 138.53 | 3.16  | + |
| Triamcinolone          | <chem>CC12CC(O)C3(F)C(CCC4=CC(=O)C=CC34C)C1CC(O)C2(O)C(=O)CO</chem>                                                                                                                                                                                       | 114.68 | 3.42  | + |
| Triazolam              | <chem>Cc1n[nH]c2ncnc(-c3ccccc3Cl)c3cc(Cl)ccc3n12</chem>                                                                                                                                                                                                   | 45.78  | 1.60  | + |
| Trifluoperazine        | <chem>CN1CCN(CCCN2c3ccccc3Sc3ccc(cc23)C(F)(F)F)CC1</chem>                                                                                                                                                                                                 | 35.02  | 4.96  | + |
| Trihexyphenidyl        | <chem>OC(CCN1CCCC1)(C1CCCC1)c1ccccc1</chem>                                                                                                                                                                                                               | 23.47  | 3.84  | + |
| Trimeprazine           | <chem>CC(CN(C)C)CN1c2ccccc2Sc2ccccc12</chem>                                                                                                                                                                                                              | 31.78  | 4.11  | + |
| Trimethobenzamide      | <chem>COc1cc(cc(O)c1OC)C(=O)Nc1ccc(OCCN(C)C)cc1</chem>                                                                                                                                                                                                    | 69.21  | 3.63  | + |
| Trimipramine           | <chem>CC(CN(C)C)CN1c2ccccc2CC2ccccc12</chem>                                                                                                                                                                                                              | 6.48   | 3.74  | + |
| Trofosfamide           | <chem>ClCCN(CCC)P1(=O)OCCCN1CCCl</chem>                                                                                                                                                                                                                   | 41.93  | 1.32  | + |
| Tropisetron            | <chem>CN1C2CCC1CC(C2)OC(=O)c1c[nH]c2ccccc12</chem>                                                                                                                                                                                                        | 44.81  | 1.01  | + |
| Trovafoxacin           | <chem>NC1C2CN(C2)C1c1nc2n(cc(C)C(=O)=O)c(O)c2cc1F)-c1ccc(F)cc1F</chem>                                                                                                                                                                                    | 100.88 | 0.43  | + |
| Tubocurarine           | <chem>COc1cc2CC[N+](C)(C)C3C4ccc(O)c(O)c5cc6C(Cc7ccc(Oc(c1O)c23)cc7)[N+](C)(C)CCc6cc5O)C4</chem>                                                                                                                                                          | 77.38  | 5.44  | - |
| Urapidil               | <chem>COc1ccccc1N1CCN(CCCN2ccc(=O)n(C)C(=O)n2C)CC1</chem>                                                                                                                                                                                                 | 71.62  | 0.82  | + |
| Ursodeoxycholic_Acid   | <chem>CC(C)C(O)=O)C1CCC2C3(C)CC4CC(O)CC4C)C3CCC12C</chem>                                                                                                                                                                                                 | 77.76  | 4.48  | + |
| Valdecoxib             | <chem>Cc1ncc(c1-c1ccc(cc1)S(N)=O)=O)c1ccccc1</chem>                                                                                                                                                                                                       | 94.46  | 0.61  | + |
| Valsartan              | <chem>CCCC(=O)N(Cc1ccc(cc1)-c1ccccc1-c1n[nH]1)C(C)C(C)C(O)=O</chem>                                                                                                                                                                                       | 111.45 | 3.72  | + |
| Vancomycin             | <chem>CNC(C)C(C)C(=O)NC1C(O)c2ccc(Oc3ccc4cc(Oc5ccc(cc5Cl)C(O)G5NC(=O)C(NC(=O)O)C1)C(C)C(C)C(N)C(O)C(C)C(O)C1OC1CC(C)N)C(O)C(C)C(O)C1)C(C)C2</chem>                                                                                                        | 530.49 | -3.42 | - |
| Varenicline_tartrate   | <chem>C1C2CNCC1c1cc3nccnc3cc21</chem>                                                                                                                                                                                                                     | 37.81  | 1.42  | + |
| Venlafaxine            | <chem>COc1ccc(cc1)C(C)C(C)C1(O)CCCC1</chem>                                                                                                                                                                                                               | 32.70  | 3.04  | + |
| Vidarabine             | <chem>Nc1nnc2n(cnc12)C1OC(CO)C(O)C1O</chem>                                                                                                                                                                                                               | 139.54 | -2.30 | - |
| Vilazodone             | <chem>Cl.NC(=O)c1cc2ccc(ccc2o1)N1CCN(CCCc2c[nH]c3ccc(cc23)C#N)CC1</chem>                                                                                                                                                                                  | 101.55 | 0.88  | + |
| Vildagliptin           | <chem>OC12CC3CC(C1)CC(C3)(C2)NCC(=O)N1CCCC1C#N</chem>                                                                                                                                                                                                     | 75.74  | 3.68  | + |
| Viloxazine             | <chem>CCOC1ccccc1OCC1COCCN1</chem>                                                                                                                                                                                                                        | 39.72  | 2.49  | + |
| Vismodegib             | <chem>CS(=O)(=O)c1ccc(C(=O)Nc2ccc(Cl)c2)-c2ccccc2)c(Cl)c1</chem>                                                                                                                                                                                          | 84.16  | -1.84 | + |
| Voriconazole           | <chem>CC(C1ncc1F)C(O)(Cn1cncn1)c1ccc(F)cc1F</chem>                                                                                                                                                                                                        | 76.71  | 2.48  | + |
| Warfarin               | <chem>CC(=O)CC(c1ccccc1)c1c(O)c2ccccc2oc1=O</chem>                                                                                                                                                                                                        | 67.43  | 0.30  | + |
| Xamoterol              | <chem>OC(C)CCN(C)C(=O)N1CCOCC1)COc1ccc(O)cc1</chem>                                                                                                                                                                                                       | 103.29 | -0.62 | - |
| Ximoprofen             | <chem>CC(C)C(O)=O)c1ccc(cc1)C1CCCC1(1)=NO</chem>                                                                                                                                                                                                          | 69.81  | 2.69  | + |
| Xipamide               | <chem>Cc1ccc(C)c1NC(=O)c1cc(c(Cl)cc1O)S(N)=O</chem>                                                                                                                                                                                                       | 117.87 | 1.52  | + |
| Zaleplon               | <chem>CCN(C)C(=O)c1ccccc1)-c1ccnc2c(cnn12)C#N</chem>                                                                                                                                                                                                      | 74.26  | 1.81  | + |
| Zanamivir              | <chem>CC(=O)NC1C(NC(N)=N)C=C(O)C1(O)C(O)C(O)C(=O)=O</chem>                                                                                                                                                                                                | 198.22 | -3.58 | - |
| Zatebradine            | <chem>COc1ccc(CCN(C)CCCN2CCc3cc(O)c(C)OC)cc3CC2=O)cc1OC</chem>                                                                                                                                                                                            | 59.95  | 2.17  | + |
| Zileuton               | <chem>CC(N)C(N)=O)c1cc2ccccc2s1</chem>                                                                                                                                                                                                                    | 94.57  | 1.55  | + |
| Ziprasidone            | <chem>Clc1cc2NC(=O)C2cc1CCN1CCN(CC1)c1nsc2ccccc12</chem>                                                                                                                                                                                                  | 76.69  | 2.55  | + |
| Zolpidem               | <chem>CCCN(C)C(C)C(=O)C1c1cc2ccc(C)cn12)-c1ccc(Cl)cc1</chem>                                                                                                                                                                                              | 37.61  | 4.81  | + |
| Zomepirac              | <chem>Cc1cc(C)C(O)=O)n(C)C1C(=O)c1ccc(Cl)cc1</chem>                                                                                                                                                                                                       | 59.30  | 2.19  | + |
| Zonisamide             | <chem>NS(=O)(=O)Cc1ncc2ccccc12</chem>                                                                                                                                                                                                                     | 94.57  | 4.05  | + |
| Zopiclone              | <chem>CN1CCN(CC1)C(=O)OC1N(C(=O)c2nccn12)c1ccc(Cl)cn1</chem>                                                                                                                                                                                              | 91.12  | 1.85  | + |
| Zotepine               | <chem>CN(C)CCOC1=Cc2ccccc2Sc2ccc(Cl)cc12</chem>                                                                                                                                                                                                           | 37.77  | 4.77  | + |
| Zuclopenthixol         | <chem>OCCN1CCN(CCC=C2c3ccccc3Sc3ccc(Cl)cc23)CC1</chem>                                                                                                                                                                                                    | 52.01  | 4.99  | + |

**Table S2. BBB-dataset.** BBB+ and BBB- correspond to brain permeant and non-permeant compounds, respectively.

| Name                                   | SMILES                                                        | tPSA [Å <sup>2</sup> ] | WLOGP | BBB |
|----------------------------------------|---------------------------------------------------------------|------------------------|-------|-----|
| 1-Butyl-3-phenylthiourea               | CCCCNC(=S)Nc1cccc1                                            | 56.15                  | 2.58  | +   |
| 1-hexyl-4-(4-iodophenyl)piperazine     | CCCCCCN1CCN(CC1)c1ccc(I)cc1                                   | 6.48                   | 3.23  | +   |
| 1-hydroxyalprazolam                    | OCc1nnc2CN=C(c3ccccc3)c3cc(Cl)ccc3-n12                        | 63.30                  | 2.08  | -   |
| 1-isobutyl-4-(4-iodophenyl)piperazine  | CC(C)CN1CCN(CC1)c1ccc(I)cc1                                   | 6.48                   | 2.31  | +   |
| 1-pentanol                             | CCCCO                                                         | 20.23                  | 1.17  | +   |
| 1,2,3,4-tetrahydroquinoline            | C1CNc2ccccc2C1                                                | 12.03                  | 1.47  | +   |
| 1,4-divinyloxybutane                   | C=COCCCOCC=C                                                  | 18.46                  | 2.09  | +   |
| 2-Ethoxy-2-methylpropane (ETBE)        | CCOC(C)(C)C                                                   | 9.23                   | 1.82  | +   |
| 2-fluoroethyl-carbamidodithioate       | NC(=N)SCCF                                                    | 75.17                  | 1.00  | -   |
| 2-Methoxy-2-methylbutane               | CCC(C)(C)OC                                                   | 9.23                   | 1.82  | +   |
| 3-Hydroxy-3-phenylpentanamide (3-HEPP) | CCC(O)(CC(N)=O)c1ccccc1                                       | 63.32                  | 1.05  | +   |
| 4-hydroxyalprazolam                    | Cc1nnc2C(O)N=C(c3ccccc3)c3cc(Cl)ccc3-n12                      | 63.30                  | 2.37  | -   |
| 4-phenylbenzoic_acid                   | OC(=O)c1ccc(cc1)-c1ccccc1                                     | 37.30                  | 3.05  | -   |
| Abacavir                               | Nc1nc(NC2CC2)c2ncn(C3CC(CO)C=C3)c2n1                          | 101.88                 | 0.85  | -   |
| Acrylonitrile                          | C=CC#N                                                        | 23.79                  | 0.7   | +   |
| Acyclovir                              | Nc1nc2n(COCCO)cnc2c(=O)[nH]1                                  | 119.05                 | -1.48 | -   |
| Alfentanil                             | CCC(=O)N(c1ccccc1)C1(COC)CCN(CCN2nncn(CC)c2=O)CC1             | 85.49                  | 1.00  | -   |
| Alniditan                              | C(CNCC1CCc2ccccc2O1)CNC1=NCCCN1                               | 57.68                  | 0.54  | -   |
| Alovudine                              | Cc1cn(C2CC(F)C(CO)O2)c(=O)[nH]c1=O                            | 84.32                  | -0.44 | -   |
| Alprazolam                             | Cc1nnc2CN=C(c3ccccc3)c3cc(Cl)ccc3-n12                         | 43.07                  | 3.05  | +   |
| Alprenolol                             | CC(C)NCC(O)Cc1ccccc1CC=C                                      | 41.49                  | 2.15  | -   |
| Aminopyrine                            | CN(C)c1c(C)n(C)n(-c2ccccc2)c1=O                               | 30.17                  | 1.55  | +   |
| Amitriptyline                          | CN(C)CCC=C1c2ccccc2CCc2ccccc12                                | 3.24                   | 4.17  | +   |
| Amoxapine                              | Clc1ccc2Oc3ccccc3N=C(N3CCNCC3)c2c1                            | 36.86                  | 2.29  | +   |
| Amprenavir                             | CC(C)CN(CCC(O)C(Cc1ccccc1)NC(=O)OC1CCOC1)S(=O)(=O)c1ccc(N)cc1 | 139.57                 | 3.49  | -   |
| Antimalaric-ORG34167                   | NC(CC=C)c1ccccc1-c1ncc2ccccc12                                | 52.05                  | 3.75  | +   |
| Apaxifylline                           | CCc1c2nc([nH]c2c(=O)n(CCC)c1=O)C1CCC(=O)C1                    | 89.75                  | 1.54  | -   |
| AR-1D9859                              | CCCCN1CC2C3c3c(OC)c(O)cc3CC2C1                                | 21.7                   | 2.69  | +   |
| Asenapine                              | CN1CC2C(C1)c1cc(Cl)ccc1Oc1ccccc1                              | 12.47                  | 3.88  | +   |
| Astemizole                             | COc1ccc(CCN2CCC(CC2)Nc2nc3ccccc3n2Cc2ccc(F)cc2)cc1            | 42.32                  | 5.20  | -   |
| Astmizol-analog-NBI1                   | Cc1nnc(C1)C1CCN(CC1)c1ncc2ccccc2n1Cc1ccc(F)cc1                | 38.88                  | 4.61  | +   |
| Astmizol-analog-NBI10e                 | Fc1ccc(Cn2c(nc3ccccc3)C2CCNCCS2)cc1                           | 55.15                  | 3.32  | +   |
| Astmizol-analog-NBI2                   | CN1CCCC(C1)c1ncc2ccccc2n1Cc1ccc(F)cc1                         | 21.06                  | 4.07  | +   |
| Astmizol-analog-NBI4g                  | Fc1ccc(Cn2c(nc3ccccc3)C2CCNCC2)cc1                            | 29.85                  | 3.73  | +   |
| Astmizol-analog-NBI9a                  | Cc1ccc(Cn2c(nc3ccccc3)C2CCNCCO2)cc1                           | 39.08                  | 2.35  | +   |
| Astmizol-analog-NBI9b                  | Fc1ccc(Cn2c(nc3ccccc3)C2CCNCCO2)cc1                           | 39.08                  | 2.6   | +   |
| Atenolol                               | CC(C)NCC(O)COc1ccc(CCN)cc1                                    | 84.58                  | 0.45  | -   |
| Atropine                               | CN1C2CCC1CC(C2)OC(=O)C(CO)c1ccccc1                            | 49.77                  | 1.55  | +   |
| AZ-11713908                            | CCOc1ccc(Cc2nc3ccc(ccc3n2CC2CCOCC2)N(C)S(=O)(=O)c2cccs2)nc1   | 113.94                 | 6.97  | -   |
| AZ-CB-inhibitor-29                     | CCS(=O)(=O)n1c2CCN(Cc2c2cc(ccc12)C(=O)N1CCC(C)CC1)C1CCOCC1    | 80.23                  | 3.42  | -   |
| AZ-CB-inhibitor-5                      | CC1CCN(CC1)C(=O)c1ccc2n(CCC=C)c3CCN(CC4CC4)Cc3c2c1            | 28.48                  | 3.49  | -   |
| Beloxepin                              | CN1CCC2(O)C(C1)c1ccc(C)c1Oc1ccccc1                            | 32.7                   | 2.92  | +   |
| Beloxepin-analog-ORG32104              | Cc1ccccc2C3CNCCC3(O)c3ccccc3Oc12                              | 41.49                  | 2.58  | +   |
| Benzylidene-tert-butylamine-N-oxide    | CC(C)(C)N+([O-])=Cc1ccccc1                                    | 32.59                  | 2.83  | +   |
| Betaxolol                              | CC(C)NCC(O)COc1ccc(CCOCC2CC2)cc1                              | 50.72                  | 2.33  | +   |
| Biperiden                              | OC(CCN1CCCC1)(C1CC2CC1C=C2)c1ccccc1                           | 23.47                  | 3.47  | +   |
| BMS-CDK2,7,9-inhibitor (SNS-032)       | CC(C)(C)c1nc(CSc2cnc(NC(=O)C3CCNCC3)s2)j1                     | 133.59                 | 2.94  | -   |
| BMS-lbersartan-analog-1                | CN1CN(c2ccc(Br)cc2)C2(CCN(CCCC(=O)c3ccc(F)cc3)CC2)C1=O        | 43.86                  | 3.60  | -   |
| BMS-lbersartan-analog-2                | CN1CN(c2ccccc2)C2(CCN(CCCC(=O)c3ccc(F)cc3)CC2)C1=O            | 72.10                  | 2.94  | -   |
| Bremazocine                            | CCC12CCN(CC3(O)CC3)C(Cc3ccccc3)cc13)C2(C)C                    | 43.7                   | 2.78  | +   |
| Bretazenil                             | CC(C)(C)OC(=O)c1nnc2c1c1CCCN1C(=O)c1c(Br)ccc2-21              | 64.43                  | 3.18  | +   |
| Bretazenil-derivative-1                | CC(C)c1nc(no1)-c1nnc-2c1CN(C)(C)=O)c1c(C)cccc-21              | 77.05                  | 2.75  | -   |
| Bretazenil-derivative-2 (di-OH)        | CN1Cc2c(ncn2-c2ccccc(Cl)c2C1=O)-c1ncc(n1)C(C)(CO)CO           | 117.51                 | 0.87  | -   |
| Bretazenil-derivative-3 (OH)           | CN1Cc2c(ncn2-c2ccccc(Cl)c2C1=O)-c1ncc(n1)C(C)(CO)             | 97.28                  | 1.75  | -   |
| Bretazenil-derivative-4                | CN1Cc2c(ncn2-c2ccccc(Cl)c2C1=O)-c1ncc(n1)C(C)(CO)CO           | 117.51                 | 0.72  | -   |
| Budipine                               | CC(C)(C)N1CCC(CC1)(c1ccccc1)c1ccccc1                          | 3.24                   | 4.49  | +   |
| Bupropion                              | CC(NC(C)(C)C)C(=O)c1ccc(Cl)cc1                                | 29.1                   | 3.3   | +   |
| Butamben                               | CCCCOC(=O)c1ccc(N)cc1                                         | 52.32                  | 2.23  | +   |
| Butaperazine                           | CCCC(=O)c1ccc2Sc3ccccc3N(CCCN3CCN(C)CC3)c2c1                  | 52.09                  | 3.77  | +   |
| Butyl-acetate                          | CCCCOC(C)=O                                                   | 26.3                   | 1.35  | +   |
| Camphothecin                           | CCC1(O)C(=O)OCc2c1cc1-c3nc4cccc4cc3Cn1c2=O                    | 81.42                  | 1.82  | -   |
| Carbon-disulfide                       | S=C=S                                                         | 64.18                  | 1.02  | +   |
| Carmustine                             | ClCCN(C=O)N(CCC)N=O                                           | 61.77                  | 1.16  | +   |
| Carteolol                              | CC(C)(C)NCC(O)COc1ccc2NC(=O)CCc12                             | 70.59                  | 1.13  | -   |
| Carvedilol-derivate                    | CC(CF)NCC(O)COc1ccc2[nH]c3ccccc3c12                           | 57.28                  | 3.43  | +   |
| Cerivastatin                           | COc1c(nc(C)C)C(C)c(C=C(C)O)CC(O)CC(O)=O)c1-c1ccc(F)cc1)C(C)C  | 99.88                  | 5.04  | -   |
| Chlorpromazine                         | CN(C)CCCN1c2ccccc2Sc2ccc(Cl)cc12                              | 31.78                  | 4.51  | +   |
| Clobazam                               | CN1c2ccc(Cl)cc2N(c2ccccc2)C(=O)CC1=O                          | 40.62                  | 2.61  | +   |
| Clonidine-analog-14                    | Cc1ccc(NC2=NCCN2)c(C)c1                                       | 36.42                  | 0.72  | -   |
| Clonidine-analog-2                     | Brc1ccc(Br)c1NC1=NCCN1                                        | 36.42                  | 1.63  | +   |
| Clonidine-analog-3                     | Fc1ccc(F)c1NC1=NCCN1                                          | 36.42                  | 1.22  | -   |
| Clozapine                              | CN1CCN(CC1)C1=Nc2cc(C)ccc2Nc2ccccc12                          | 30.87                  | 2.2   | +   |
| Cocaine                                | COc(=O)C1C2CCC(C1OC(=O)c1ccccc1)N2C                           | 55.84                  | 1.49  | +   |
| Cortisol                               | CC12CC(O)C3C(CCC4=CC(=O)CC34C)C1CCC2(O)C(=O)CO                | 94.83                  | 1.78  | -   |
| D-Phenylalanine-L-Proline              | NC(Cc1ccccc1)C(=O)ON1CCC1C(O)=O                               | 92.86                  | 0.18  | -   |
| D4r-ligand-1                           | Clc1ccc(cc1)N1CCN(Cc2cnn3ccccc23)CC1                          | 23.78                  | 2.4   | +   |
| Daidzein                               | Oc1ccc(cc1)-c1ccc2cc(O)ccc2c1=O                               | 70.67                  | 2.87  | +   |
| Dehydroevodiamine                      | C[n+1]c2C3Nc4cccc4C3CN2c(=O)c2ccccc12                         | 38.96                  | 2.38  | +   |
| Delavirdine                            | CC(C)Nc1ccccc1N1CCN(CC1)C(=O)c1ccc2NS(C)(=O)ccc2[nH]1         | 118.81                 | 2.65  | -   |
| Demonomethylchlorpromazine             | CNCCCN1c2ccccc2Sc2ccc(Cl)cc12                                 | 40.57                  | 4.17  | +   |
| Desipramine                            | CNCCCN1c2ccccc2CCc2ccccc12                                    | 15.27                  | 3.15  | +   |
| Dextromethorphan                       | COc1ccc2CC3C4CCCC4(CCN3C)c2c1                                 | 12.47                  | 3     | +   |
| Diazepam                               | CN1c2ccc(Cl)cc2C(=NCC1=O)c1ccccc1                             | 32.67                  | 2.39  | +   |
| Diclazuril                             | Clc1ccc(cc1)C(C#N)c1c(Cl)ccc(cc1)n1ncc(=O)[nH]c1=O            | 91.54                  | 3.54  | -   |
| Didanosine                             | OCC1CCC(O1)n1cnc2c1[nH]cnc2=O                                 | 93.03                  | -0.53 | -   |
| Didemethylchlorpromazine               | NCCCN1c2ccccc2Sc2ccc(Cl)cc12                                  | 54.56                  | 3.91  | +   |
| Didesipramine                          | NCCCN1c2ccccc2CCc2ccccc12                                     | 29.26                  | 2.89  | +   |

|                                       |                                                                                     |        |       |   |
|---------------------------------------|-------------------------------------------------------------------------------------|--------|-------|---|
| Diphenhydramine                       | CN(C)CCOC(c1ccccc1)c1ccccc1                                                         | 12.47  | 3.03  | + |
| Dizocilpine                           | CC12NC(Cc3ccccc13)c1ccccc21                                                         | 12.03  | 2.34  | + |
| Donepezil                             | COc1cc2CC(CCC3CCN(Cc4ccccc4)CC3)C(=O)c2cc1OC                                        | 38.77  | 3.83  | + |
| Doxepin                               | CN(C)CCC=C1c2ccccc2OCc2ccccc12                                                      | 12.47  | 3.81  | + |
| Doxylamine                            | CN(C)CCOC(C)(c1ccccc1)c1ccccc1                                                      | 25.36  | 2.81  | + |
| Edelfosine                            | CCCCCCCCCCCCCCCCCCCC(COP(O))=O)OCC[N+](C)(C)C)OC                                    | 84.03  | 7.12  | - |
| Enaminone-derivative-DM44             | COC(=O)C1C(C)CC(Nc2ccccc2)[N+]([O-])=O)=CC1=O                                       | 105.06 | 2.51  | - |
| Enaminone-derivative-DM49             | COC(=O)C1C(C)CC(Nc2ccccc2OC(F)(F)F)c2=CC1=O                                         | 64.63  | 4.35  | - |
| Enaminone-derivative-DM5 (ADD-196022) | COC(=O)C1C(C)CC(Nc2ccccc2)c2=CC1=O                                                  | 55.4   | 2.84  | + |
| Ergotamine                            | CN1CC(CCC2C1CC1=C3C(NC=C1)C=CC=C23)C(=O)NC1(C)OC2(O)C3CCCCN3C(=O)C(Cc3ccccc3)N2C1=O | 114.45 | 0.03  | - |
| Ethanol                               | CCO                                                                                 | 20.23  | 0.00  | + |
| Ethyl-acetate                         | CCOC(C)=O                                                                           | 26.3   | 0.57  | + |
| Etodolac                              | CCc1ccc2c3CCOC(C)(C)(O)=O)c3[nH]c12                                                 | 62.32  | 3.27  | - |
| Ezlopitant (Pfizer-NK1r-1)            | COc1ccc(cc1)CNC1C2CCN(C2)C1C(c1ccccc1)c1ccccc1)C(C)C                                | 24.5   | 5.67  | + |
| Fentanyl                              | CCC(=O)N(C1CCN(Cc2ccccc2)CC1)c1ccccc1                                               | 23.55  | 3.76  | + |
| Fluconazole                           | OC(Cn1cncn1)(Cn1cncn1)c1ccc(F)cc1F                                                  | 81.65  | 1.47  | - |
| Fluoromisonidazole                    | OC(COCF)Cn1ccnc1N(=O)=O                                                             | 93.10  | 1.04  | - |
| Fluroxene                             | FC(F)(F)COC=C                                                                       | 9.23   | 2.97  | + |
| Fluroxene-analog                      | FC=COC=CF                                                                           | 9.23   | 2.72  | + |
| Flutemetamol-Iodo-analog              | Nc1ccc(cc1)-c1nc2ccc(O)cc2s1                                                        | 87.38  | 3.86  | + |
| Gabapentin                            | NCC1(CO)C(=O)CCCC1                                                                  | 63.32  | -1.37 | - |
| Galantamine                           | COc1ccc2CN(C)CCC34C=CC(O)CC3Oe1c24                                                  | 41.93  | 1.32  | + |
| Galantamine-analog                    | COc1ccc2CN(C)CCC=CC(O)CC4Oe1c2C34                                                   | 41.93  | 1.14  | + |
| Gepirone-analog-ORG13011              | FC(F)(F)c1ccnc(c1)N1CCN(CCCCN2CCC2=O)CC1                                            | 39.68  | 2.63  | + |
| Granisetron                           | CN1C2CCCC1CC(C2)NC(=O)c1nnc1c2ccccc12                                               | 50.16  | 1.94  | + |
| Guanidinothiazole-derivative-SKB-16   | CCNC(NC#N)=NCCSCc1nccccc1Br                                                         | 98.40  | 1.96  | - |
| Guanidinothiazole-derivative-SKB-19   | NC(N)=Nc1nc(cs1)-c1ccccc1                                                           | 105.53 | 1.71  | - |
| Guanidinothiazole-derivative-SKB-22   | NC(N)=Nc1nc(cs1)-c1ccc(N)c1                                                         | 131.55 | 1.31  | - |
| Guanidinothiazole-derivative-SKB-24   | CNC(Nc1ccccc1)-c1csc(N=C(N)N)n1)=NC#N                                               | 165.74 | 0.99  | - |
| Guanidinothiazole-derivative-SKB-26   | CC(=O)Nc1ccccc1)-c1csc(N=C(N)N)n1                                                   | 134.63 | 1.48  | - |
| GW-MCHR1-antagonist-1                 | CCc1ccc(cc1)-n1nc2c(sc3nccc(N)C)CCc4ccccc4)c23)c1=O                                 | 92.15  | 4.63  | - |
| GW-MCHR1-antagonist-2                 | CCc1ccc(cc1)-n1nc2c(sc3nccc(N)C)C)c23)c1=O                                          | 79.26  | 3.62  | - |
| GW-MCHR1-antagonist-7a                | O=C(Cc1ccc(OCC2ccccc2)cc1)Nc1ccc2cnn(CCN3CCCC3)c2c1                                 | 59.39  | 4.17  | - |
| GW-MCHR1-antagonist-8                 | Clc1ccc2oc(=O)cc(NC3CCN(Cc4ccccc4)CC3)c2c1                                          | 54.71  | 3.73  | - |
| Histamine-analog-YG16                 | NCCc1nccs1                                                                          | 67.15  | 0.64  | - |
| Histamine-analog-YG19                 | NCCc1nc(cs1)-c1ccccc1                                                               | 67.15  | 2.31  | - |
| Hydroxyzine                           | OCCOCCN1CCN(C1)C(c1ccccc1)c1ccc(Cl)cc1                                              | 35.94  | 1.97  | + |
| ICI-Tiotidine-analog-1                | CN=C(NC#N)Nc1ccccc1)-c1csc(N=C(N)N)n1                                               | 165.74 | 0.99  | - |
| ICI-Tiotidine-analog-2                | Cc1cnc(N=C(N)N)s1                                                                   | 105.53 | 0.36  | - |
| Icotidine                             | COc1cccnc1CCCCNc1nc(=O)c(Cc2ccc(C)nc2)c[nH]1                                        | 92.79  | 2.71  | - |
| Imipramine                            | CN(C)CCCN1c2ccccc2CCc2ccccc12                                                       | 6.48   | 3.49  | + |
| Iodoxylenediamine-1                   | lc1ccc(CN2CCCC2)cc1CN1CCCC1                                                         | 6.48   | 3.2   | + |
| Iodoxylenediamine-2                   | CCC(C)Nc1ccc(l)c(NC(C)CC)c1                                                         | 24.06  | 4.33  | + |
| Isobutyl-acetate                      | CC(C)COC(C)=O                                                                       | 26.3   | 1.21  | + |
| Isopentyl-acetate                     | CC(C)CCOC(C)=O                                                                      | 26.3   | 1.6   | + |
| Isopropyl-acetate                     | CC(C)OC(C)=O                                                                        | 26.3   | 0.96  | + |
| KCL-440                               | CN(C)Cc1ccc(cc1)-c1c[nH]c(=O)c2ccccc(O)c12                                          | 56.33  | 2.81  | + |
| Lapatinib                             | CS(=O)(=O)CCNCCc1ccc(o1)-c1ccc2cnc(Nc3ccc(OCC4ccccc4)C4)C)c3)c2c1                   | 114.73 | 7.34  | - |
| Lidocaine                             | CCN(CC)CC(=O)Nc1c(C)ccccc1C                                                         | 32.34  | 2.39  | + |
| Lorazepam                             | OC1N=C(c2ccccc2)C)c2cc(Cl)ccc2NC1=O                                                 | 61.69  | 2.15  | + |
| Loreclezole                           | ClC(=Cn1cncn1)c1ccc(Cl)cc1Cl                                                        | 30.71  | 3.67  | + |
| Loxapine                              | CN1CCN(C1)C1=Nc2ccccc2Occc(Cl)cc12                                                  | 28.07  | 2.63  | + |
| Lupitidine                            | CN(C)Cc1ccc(CSCCNc2nc(=O)c(Cc3ccc(C)nc3)c[nH]2)o1                                   | 112.35 | 2.57  | - |
| Lupitidine-analog-SKB26               | CN(C)Cc1ccc(o1)-c1ccccc1Nc2[nH]ccc2[N+](=O)O)c1                                     | 93.86  | 4.25  | - |
| Lupitidine-analog-SKF93319            | CN(C)Cc1ccc(CSCCNc2nc(=O)c(Cc3ccc4ccccc4)c[nH]2)o1                                  | 99.46  | 4.02  | - |
| Lupitidinum                           | Cc1ccc(Cc2cnc(NCCSCc3ccc(o3)C)(C)(N)[nH]c2=O)cn1                                    | 135.13 | 2.75  | - |
| Mannitol                              | OCC(O)C(O)C(O)C(O)CO                                                                | 121.38 | -3.59 | - |
| Maprotiline                           | CNC(CCC12CC(Cc3ccccc13)c1ccccc21                                                    | 12.03  | 4.21  | + |
| Maropitant (Pfizer-NK1r-antagonist-2) | COc1ccc(cc1)CNC1C2CCN(C2)C1C(c1ccccc1)c1ccccc1)C(C)(C)C                             | 24.5   | 5.84  | + |
| MCHR-antagonist-JNJ-1                 | CCN(CC)Cc1ccc2CC(CCCc2)N1CCN(CCCc2ccc(F)cc2)CC1=O                                   | 26.79  | 3.42  | + |
| MCHR-antagonist-JNJ-19                | Clc1ccc2[nH]nc(NC3CCN(Cc4ccccc4)CC3)c2c1                                            | 62.41  | 3.3   | + |
| MCHR-antagonist-JNJ-2                 | Clc1ccc2oc(=O)cc(NC3CCN(Cc4ccccc4)CC3)c2c1                                          | 45.48  | 4.36  | + |
| MCHR-antagonist-JNJ-23c               | CCc1ccc(cc1)-c1ccc(cc1)C(=O)N(C)C1CCN(C1)C(=O)N1CCC(C)N1CCCC1                       | 47.1   | 3.6   | + |
| MCHR-antagonist-JNJ-28                | COc1ccc2[nH]nc(NC3CCN(Cc4ccccc4)CC3)c2c1                                            | 71.64  | 2.65  | + |
| MCHR-antagonist-JNJ-7c                | COc1cc(ccc1)OCCN1CCCC1)-n1nc2cc(sc2c1=O)-c1ccc(Cl)cc1                               | 84.83  | 4.87  | + |
| Meprobamate                           | CCCC(C)(COC(N)=O)COC(N)=O                                                           | 104.64 | 0.98  | - |
| Mepyramine                            | COc1ccc(CN(CCN(C)C)c2ccccc2)cc1                                                     | 28.6   | 2.51  | + |
| Methadone                             | CCC(=O)C(C)C(C)N(C)C)(c1ccccc1)c1ccccc1                                             | 20.31  | 4.29  | + |
| methoxyflurane                        | COC(F)(F)C(Cl)Cl                                                                    | 9.23   | 2.87  | + |
| Methyl_acetate                        | COC(C)=O                                                                            | 26.30  | 0.18  | - |
| Methyl-carbamimidothioate             | CSC(N)=N                                                                            | 75.17  | 0.24  | - |
| Methyl-tert-butyl-ether               | COC(C)C(C)C                                                                         | 9.23   | 1.43  | + |
| mGluR1-inhibitor-AR1                  | CN(C)c1ccnc2sc3c(ncn(N4CCCCC4)c3=O)c12                                              | 82.5   | 2.2   | + |
| Midazolam                             | Cc1ncc2CN=C(c3ccccc3F)c3cc(Cl)ccc3-n12                                              | 30.18  | 4.21  | + |
| Miloxacin                             | COnc1cc(C(O)=O)c(=O)c2ccc3OCOC3cc12                                                 | 86.99  | 0.49  | - |
| Mirtazapine                           | CN1CCN2C(C1)c1ccccc1C1ccccc21                                                       | 19.37  | 1.39  | + |
| Mitratapid                            | CCC(C)n1cnc(-c2ccc(cc2)N2CCN(C2)c2ccc(OCC3COC(CSc4nncn4C)(O3)c3ccc(Cl)cc3)cc2)c1=O  | 130.00 | 4.68  | - |
| Monodesmethylpromazine                | CNCCN1c2ccccc2Sc2ccccc12                                                            | 40.57  | 3.52  | + |
| MPPF                                  | COc1ccccc1N1CCN(CCN(C(=O)c2ccc(F)cc2)c2ccccc2)CC1                                   | 48.91  | 3.36  | + |
| N-methylthiazolium-DCKA               | Cc1c(CCCOC(=O)c2ccc(=O)c3c(Cl)cc(Cl)cc3[nH]2)sc[n+](1)C                             | 92.33  | 4.22  | - |
| Nalidixic_acid                        | CCn1cc(C(O)=O)c(=O)c2ccc(C)nc12                                                     | 72.19  | 1.42  | - |
| Naproxen                              | COc1ccc2cc(c(cc2c1)C)(C)C(O)=O                                                      | 46.53  | 3.04  | + |
| Naxagolide                            | CCCN1CCOC2C1CCc1ccc(O)cc21                                                          | 32.7   | 1.79  | + |
| Nebivololol                           | OC(CNCC(O)C1CCc2cc(F)ccc2O1)C1CCc2cc(F)ccc2O1                                       | 70.95  | 3.2   | + |
| Nitrofurantoin                        | [O-][N+](=O)c1ccc(C=NN2CC(=O)NC2=O)O1                                               | 124.57 | -0.27 | - |
| Norlobazam                            | Clc1ccc2NC(=O)CC(=O)N(c3ccccc3)c2c1                                                 | 49.41  | 2.39  | + |
| Norharman                             | c1ccc2c(c1)[nH]c1cnc2c1                                                             | 28.68  | 2.72  | + |
| Northioridazine                       | CSc1ccc2Sc3ccccc3N(CCC3CCCN3)c2c1                                                   | 65.87  | 4.64  | + |
| Olanzapine                            | CN1CCN(C1)C1=Nc2ccccc2Nc2sc(C)cc12                                                  | 59.11  | 1.92  | + |
| Omeprazole                            | COc1ccc2nc([nH]c2c1)S(=O)Cc1ncc(C)c(OC)c1C                                          | 96.31  | 3.61  | - |
| Paliperidone                          | Cc1nc2C(O)CCc2c(=O)c1CCN1CCC(CC1)c1ncc2cc(F)ccc12                                   | 84.39  | 2.80  | - |
| Pentazocine                           | CC1C2Cc3ccc(O)cc3C1(C)CCN2CC=C(C)C                                                  | 23.47  | 3.5   | + |

|                                |                                                                         |        |       |   |
|--------------------------------|-------------------------------------------------------------------------|--------|-------|---|
| Pentyl-acetate                 | CCCCOC(C)=O                                                             | 26.3   | 1.74  | + |
| Pergolide                      | CCCN1CC(CSC)CC2C1Cc1c[nH]c3cccc2c13                                     | 44.33  | 3.89  | + |
| Perphenazine                   | OCCN1CCN(CCN2c3cccc3Sc3ccc(C)cc23)CC1                                   | 55.25  | 2.8   | + |
| Pfizer-NK1r-antagonist-15      | COc1ccc(cc1)CNC1CCNC1c1cccc1)-c1nocs1                                   | 74.42  | 3.54  | + |
| Pfizer-NK1r-antagonist-17      | COc1cc2sc(C)nc2cc1CNC1CCNC1c1cccc1                                      | 74.42  | 3.34  | + |
| Pfizer-NK1r-antagonist-19      | COc1cc2oc(C)nc2cc1CNC1CCNC1c1cccc1                                      | 59.32  | 2.87  | + |
| Pfizer-NK1r-antagonist-20      | COc1ccc(cc1)CNC1CCNC1c1cccc1)-n1nc(C)cc1C                               | 51.11  | 3.22  | + |
| Pfizer-NK1r-antagonist-21      | COc1cc2sc(nc2cc1)CNC1CCNC1c1cccc1)C(C)(C)C                              | 74.42  | 4.33  | + |
| Pfizer-NK1r-antagonist-22      | CC(C)Oc1cc2sc(C)nc2cc1CNC1CCNC1c1cccc1                                  | 74.42  | 4.12  | + |
| Pfizer-NK1r-antagonist-23      | COc1cc2sc(nc2cc1)CNC1CCNC1c1cccc1)-c1cccc1                              | 74.42  | 4.7   | + |
| Pfizer-NK1r-antagonist-24      | COc1cc2sc(nc2cc1)CNC1CCNC1c1cccc1)C1CC1                                 | 74.42  | 3.85  | + |
| Pfizer-NK1r-antagonist-4       | COc1cccc1CNC1C2CCN(C2)C1C(c1cccc1)c1cccc1                               | 24.5   | 4.55  | + |
| Pfizer-NK1r-antagonist-5       | COc1cccc1CNC1CCNC1c1cccc1                                               | 33.29  | 2.42  | + |
| Pfizer-NK1r-antagonist-7       | COc1ccc(cc1)CNC1CCNC1c1cccc1)C(C)C                                      | 33.29  | 3.54  | + |
| Pfizer-NK1r-antagonist-8       | COc1ccc(cc1)CNC1CCNC1c1cccc1)C(C)(C)C                                   | 33.29  | 3.72  | + |
| Pfizer12-NK1r-antagonist       | COc1ccc(cc1)CNC1CCNC1c1cccc1)S(C)=O                                     | 75.81  | 2.91  | - |
| Pfizer13-NK1r-antagonist       | COc1cc2CCN(c2cc1)CNC1C2CCN(C2)C1C(c1cccc1)c1cccc1)S(C)=O                | 70.26  | 4.18  | - |
| Pfizer14-NK1r-antagonist       | COc1cc2CC(C)N(c2cc1)CNC1CCNC1c1cccc1)S(C)=O                             | 79.05  | 2.83  | - |
| Pfizer16-NK1r-antagonist       | COc1ccc(cc1)CNC1CCNC1c1cccc1)N1CCCC1=O                                  | 53.60  | 2.17  | - |
| Pfizer18-NK1r-antagonist       | COc1ccc(cc1)CNC1CCNC1c1cccc1)N(c1nc(C)c(C)s1)S(C)=O                     | 120.18 | 4.67  | - |
| Phencyclidine                  | C1CCN(CC)C1(CCCCC1)c1cccc1                                              | 3.24   | 3.84  | + |
| Phenylbutazone                 | CCCCC1C(=O)N(N(C1=O)c1cccc1)c1cccc1                                     | 40.62  | 3.03  | - |
| Physostigmine                  | CNC(=O)Oc1cc2N(C)C3N(C)CC3(C)C2c1                                       | 44.81  | 1.01  | + |
| POBN                           | CC(C)(C)N+([O-])=Cc1cc[n+](O)cc1                                        | 57.75  | 2.15  | - |
| Practolol                      | CC(C)NCC(O)COc1ccc(NC(C)=O)cc1                                          | 70.59  | 1.19  | - |
| Prazosin                       | COc1cc2nc(nc(N)c2cc1OC)N1CCN(CC1)C(=O)c1cccc1                           | 106.95 | 1.03  | - |
| Prednisolone                   | CC12CC(O)C3C(CCC4=CC(=O)C=CC34)C1CCC2(O)C(=O)CO                         | 94.83  | 1.56  | - |
| Probenecid                     | CCCN(CCC)S(=O)(=O)c1ccc(cc1)C(=O)O                                      | 83.06  | 3.28  | - |
| Procaine                       | CCN(CC)CCOC(=O)c1ccc(N)cc1                                              | 55.56  | 1.78  | + |
| Promazine                      | CN(C)CCCN1c2cccc2Sc2cccc12                                              | 31.78  | 3.86  | + |
| Propofol                       | CC(C)c1ccc(C(C)C)c1O                                                    | 20.23  | 3.64  | + |
| Propylhexedrine                | CNC(C)CC1CCCC1                                                          | 12.03  | 2.56  | + |
| Quercetin                      | OC1C(Cc2cc(O)cc(O)c2C1=O)c1ccc(O)c(O)c1                                 | 118.22 | 1.39  | - |
| Quetiapine                     | OCCOCCN1CCN(CC1)C1=Nc2cccc2Sc2cccc12                                    | 73.6   | 1.71  | + |
| Racemorphan                    | CN1CCC23CCCC2C1C1ccc(O)cc31                                             | 23.47  | 2.7   | + |
| Ribavirin                      | NC(=O)c1ncn(n1)C1OC(CO)C(O)C1O                                          | 143.72 | -3.34 | - |
| Ridogrel                       | OC(=O)CCCCON=C(c1cccnc1)c1cccc(c1)C(F)(F)F                              | 71.78  | 5.28  | - |
| Risocaine                      | CCCC(=O)c1ccc(N)cc1                                                     | 52.32  | 1.84  | + |
| Rivastigmine                   | CCN(C)C(=O)Oc1cccc(c1)C(C)N(C)C                                         | 32.78  | 2.44  | + |
| RO-cyclic-guanidine-analog1    | CC1NC(N)=Nc2cccc(Cl)c12                                                 | 50.41  | 0.86  | - |
| RO-cyclic-guanidine-analog2    | CC1NC(NCC(F)F)=Nc2cccc(Cl)c12                                           | 36.42  | 2.6   | + |
| RO19-4603                      | CN1Cc2c(ncn2-c2ccsc2C1=O)OC(C)(C)C                                      | 92.67  | 1.94  | - |
| Rofecoxib                      | CS(=O)(=O)c1ccc(cc1)C1=C(C(=O)OC1)c1cccc1                               | 68.82  | 3.64  | + |
| Rolipram                       | COc1ccc(cc1)OC1CCGC1)C1NNG(=O)C1                                        | 47.56  | 2.24  | + |
| Sabeluzole                     | CN(C1CCN(CC(O)COc2ccc(F)cc2)C1)c1nc2cccc2s1                             | 77.07  | 3.82  | + |
| Salicylic acid                 | OC(=O)CNC(=O)c1cccc1O                                                   | 86.63  | 0.21  | - |
| Serotonin-transporter-liagnd-1 | CN(C)Cc1cccc1Sc1ccc(F)cc1N                                              | 54.56  | 3.9   | + |
| Serotonin-transporter-liagnd-2 | CN(C)c1cccc1Sc1ccc(CCF)cc1N                                             | 54.56  | 4.43  | + |
| Sertraline                     | CNC1CCC(c2ccc(Cl)c(Cl)c2)cc2cccc12                                      | 12.03  | 4.86  | + |
| SKF-H2-antagonist              | CN(C)c1ccc(ccn1)-c1n[nH]c(N)n1                                          | 83.72  | 0.52  | - |
| Sotalol                        | CC(C)NCC(O)c1ccc(NS(C)=O)cc1                                            | 86.81  | 1.66  | - |
| Stavudine                      | Cc1cn(C2OC(CO)C=C2)c(=O)[nH]c1=O                                        | 84.32  | -1.03 | - |
| Sulphasalazine                 | OC(=O)c1ccc(cc1O)N=Nc1ccc(cc1)S(=O)(=O)Nc1cccc1                         | 149.69 | 4.59  | - |
| Talnetant-analog               | CCC(NC(=O)c1c(C)c(nc2cccc12)-c1cccc1)c1cccc1                            | 41.99  | 5.77  | + |
| Talsupram                      | CNCCC1(S(C)(C)C)c2cccc12)c1cccc1                                        | 37.33  | 4.69  | + |
| Temelastine                    | Cc1ccc(Cc2c[nH]c(NC.CCC3ccc(Br)cc3C)nc2=O)cn1                           | 83.56  | 3.77  | - |
| Tert-butanol                   | CC(C)(C)O                                                               | 20.23  | 0.78  | + |
| Tert-butyl-chlorambucil        | CC(C)(C)OC(=O)CCc1ccc(cc1)N(CCC)CCCl                                    | 29.54  | 4.64  | + |
| Testosterone                   | CC12CC3C(CCC4=CC(=O)CCC34)C1CCC2O                                       | 37.3   | 3.88  | + |
| Tetrahydropalmatine            | COc1cc2CCN3Cc4c(CCC3c2cc1OC)ccc(OC)c4OC                                 | 40.16  | 2.52  | + |
| Thiamine-Propyl-Disulfide-DCKA | CC(C)SSC(CCO(C=O)c1cc(=O)c2c(Cl)cc(Cl)cc2[nH]1)=C(C)N(Cc1cnc(C)nc1N)C=O | 181.87 | 5.60  | - |
| Thioperamide                   | S=C(NC1C.CCCC1)N1CC(C)C1c1c[nH]cn1                                      | 76.04  | 2.42  | + |
| Tibolone                       | CC1CC2=C(CCC(=O)C2)C2CCC3(C)C(CCC3(O)C#C)C12                            | 37.3   | 3.96  | + |
| Ticalopride                    | GOC1CNCC1NC(=O)c1cc(C)cn1CC1OC                                          | 85.61  | 0.66  | - |
| Tiotidine                      | CNC(NCCSc1csc(N=C(N)N)1)=NC#N                                           | 191.04 | -0.22 | - |
| Tivirapine-derivate            | CC1Cn2c3c(CN1CC=C(C)C)cc3[nH]c2=S                                       | 56.05  | 3.99  | + |
| Tolbutamide                    | CCCCNC(=O)NS(=O)(=O)c1ccc(C)cc1                                         | 83.65  | 2.86  | - |
| Toliprolol                     | CC(C)NCC(O)COc1cccc(C)c1                                                | 41.49  | 1.73  | + |
| Topiramate                     | CC1(C)OC2COC3(COS(N)=O)OC(C)(C)OC3C2O1                                  | 123.92 | 0.69  | - |
| Tramadol                       | COc1cccc(c1)C1(O)CCCC1CN(C)C                                            | 32.7   | 2.53  | + |
| Tranylcypromine-analog-1       | NC1CC1c1ccc(F)cc1                                                       | 26.02  | 2.06  | + |
| Triazolam                      | Cc1nnc2CN=C(c3cccc3C)c3cc(C)ccc3-n12                                    | 43.07  | 3.7   | + |
| Trimipramine                   | CC(CN(C)C)CN1c2cccc2CCc2cccc12                                          | 6.48   | 3.74  | + |
| urea                           | NC(N)=O                                                                 | 69.11  | -0.98 | - |
| Vinyl-ether                    | C=COC=C                                                                 | 9.23   | 1.29  | + |
| Zalcitabine                    | Nc1ccn(C2CCC(CO)O2)c(=O)n1                                              | 90.37  | -0.82 | - |
| Zalcitabine-analog             | Nc1ccn(C2CC(CO)C(CO)O2)c(=O)n1                                          | 110.60 | -1.60 | - |
| Zaltidine                      | Cc1nc(c[nH]1)-c1csc(NC(N)=N)n1                                          | 131.71 | 0.96  | - |
| Zanapezil                      | O=C(CCC1CCN(Cc2cccc2)CC1)c1ccc2CCCCNc2c1                                | 32.34  | 4.21  | + |
| Zidovudine                     | Cc1cn(C2CC(N=[N+]=N)C(CO)O2)c(=O)[nH]c1=O                               | 120.53 | -1.28 | - |
| Zolantidine                    | C(CNc1nc2cccc2s1)COc1cccc(CN2CCCC2)c1                                   | 65.63  | 4.44  | + |

**Table S3. Cross-validation for HIA ellipse.**

The 660 entries of the HIA-datasets were sorted according to tPSA and every tenth entry was attributed to the validation set. The remaining entries are considered as the training set. This procedure was repeated 10 times starting from entries 1, 2, 3, 4, 5, 6, 7, 8, 9 or 10. Ten different couples of training/validation sets were so generated.

|                         | <b>number of molecules<br/>(training/validation)</b> | <b>MCC<sub>tr</sub></b> | <b>ACC<sub>tr</sub></b> | <b>MCC<sub>va</sub></b>          | <b>ACC<sub>va</sub></b>          |
|-------------------------|------------------------------------------------------|-------------------------|-------------------------|----------------------------------|----------------------------------|
| <b>1</b>                | 595/65                                               | 0.6957                  | 0.9265                  | 0.7421                           | 0.9385                           |
| <b>2</b>                | 595/65                                               | 0.7064                  | 0.9296                  | 0.6948                           | 0.9254                           |
| <b>3</b>                | 594/66                                               | 0.6981                  | 0.9280                  | 0.6948                           | 0.9254                           |
| <b>4</b>                | 593/67                                               | 0.6924                  | 0.9263                  | 0.7649                           | 0.9403                           |
| <b>5</b>                | 593/67                                               | 0.7064                  | 0.9296                  | 0.6474                           | 0.9104                           |
| <b>6</b>                | 593/67                                               | 0.7091                  | 0.9296                  | 0.5298                           | 0.8806                           |
| <b>7</b>                | 594/66                                               | 0.7012                  | 0.9281                  | 0.6940                           | 0.9242                           |
| <b>8</b>                | 594/66                                               | 0.7233                  | 0.9331                  | 0.4854                           | 0.8788                           |
| <b>9</b>                | 594/66                                               | 0.7041                  | 0.9314                  | 0.6140                           | 0.9091                           |
| <b>10</b>               | 594/66                                               | 0.6977                  | 0.9298                  | 0.6641                           | 0.9242                           |
| <b>Cross-validation</b> |                                                      |                         |                         | <b>MCC<sub>cv</sub> = 0.6531</b> | <b>ACC<sub>cv</sub> = 0.9156</b> |

MCC<sub>tr</sub>: Matthews correlation coefficient for training set; ACC<sub>tr</sub>: accuracy for training set; MCC<sub>va</sub>: Matthews correlation coefficient for validation set; ACC<sub>va</sub>: accuracy for validation set; MCC<sub>cv</sub>: Cross-validated Matthews correlation coefficient; ACC<sub>cv</sub>: Cross-validated accuracy

**Table S4. Cross-validation for BBB ellipse.**

The 260 entries of the BBB-datasets were sorted according to tPSA and every tenth entry was attributed to the validation set. The remaining entries are considered as the training set. This procedure was repeated 10 times starting from entries 1, 2, 3, 4, 5, 6, 7, 8, 9 or 10. Ten different couples of training/validation sets were so generated.

|                         | <b>number of molecules<br/>(training/validation)</b> | <b>MCC<sub>tr</sub></b> | <b>ACC<sub>tr</sub></b> | <b>MCC<sub>va</sub></b>          | <b>ACC<sub>va</sub></b>          |
|-------------------------|------------------------------------------------------|-------------------------|-------------------------|----------------------------------|----------------------------------|
| <b>1</b>                | 235/25                                               | 0.7796                  | 0.8936                  | 0.8402                           | 0.9200                           |
| <b>2</b>                | 233/27                                               | 0.7789                  | 0.8927                  | 0.8466                           | 0.9259                           |
| <b>3</b>                | 233/27                                               | 0.7949                  | 0.9013                  | 0.7135                           | 0.8519                           |
| <b>4</b>                | 233/27                                               | 0.7875                  | 0.8970                  | 0.7689                           | 0.8889                           |
| <b>5</b>                | 233/27                                               | 0.7961                  | 0.9013                  | 0.5330                           | 0.7778                           |
| <b>6</b>                | 234/26                                               | 0.7990                  | 0.9017                  | 0.6750                           | 0.8462                           |
| <b>7</b>                | 234/26                                               | 0.7890                  | 0.8974                  | 0.7542                           | 0.8846                           |
| <b>8</b>                | 235/25                                               | 0.7895                  | 0.8979                  | 0.8402                           | 0.9200                           |
| <b>9</b>                | 235/25                                               | 0.7980                  | 0.9021                  | 0.6651                           | 0.8400                           |
| <b>10</b>               | 235/25                                               | 0.7710                  | 0.8894                  | 0.8333                           | 0.9200                           |
| <b>Cross-validation</b> |                                                      |                         |                         | <b>MCC<sub>cv</sub> = 0.7470</b> | <b>ACC<sub>cv</sub> = 0.8775</b> |

MCC<sub>tr</sub>: Matthews correlation coefficient for training set; ACC<sub>tr</sub>: accuracy for training set; MCC<sub>va</sub>: Matthews correlation coefficient for validation set; ACC<sub>va</sub>: accuracy for validation set; MCC<sub>cv</sub>: Cross-validated Matthews correlation coefficient; ACC<sub>cv</sub>: Cross-validated accuracy

**Table S5. FDA-dataset.**

46 non-prodrug new chemical entities (NCEs) with unambiguous oral bioavailability accepted by the FDA between January 2014 and September 2015. HIA+ and HIA- entries correspond to orally bioavailable and not bioavailable molecules, respectively.

Entries in italic are part of the HIA-dataset used for training.

Correctly classified compounds are in black, misclassified compounds are in red (accuracy 83%). Drugs with enough evidence of brain access are tagged as BBB+.

| Name                           | tPSA [ $\text{\AA}^2$ ] | WLOGP | HIA | BBB |
|--------------------------------|-------------------------|-------|-----|-----|
| <b>Apremilast</b>              | 127.46                  | 2.62  | +   |     |
| <b>Avibactam</b>               | 138.62                  | -1.33 | -   |     |
| <b>Belinostat</b>              | 103.88                  | 2.79  | +   |     |
| <b>Brexpiprazole</b>           | 76.81                   | 3.96  | +   | +   |
| <b>Canagliflozin</b>           | 118.39                  | 3.06  | +   |     |
| <b>Cangrelor<sup>a</sup></b>   | 335.94                  | 3.6   | -   |     |
| <b>Ceftazidime<sup>a</sup></b> | 244.76                  | -1.67 | -   |     |
| <b>Ceritinib</b>               | 125.65                  | 6.84  | +   |     |
| <b>Cholic acid</b>             | 97.99                   | 3.45  | +   |     |
| <b>Daclatasvir</b>             | 174.64                  | 4.81  | +   |     |
| <b>Dapagliflozin</b>           | 99.38                   | 1.52  | +   |     |
| <b>Deoxycholic acid</b>        | 77.76                   | 4.48  | +   |     |
| <b>Droxidopa</b>               | 124.01                  | -0.78 | +   |     |
| <b>Edoxaban</b>                | 164.87                  | 0.57  | +   |     |
| <b>Eliglustat</b>              | 74.52                   | 3.57  | +   | +   |
| <b>Eluxadoline</b>             | 164.63                  | 3.68  | +   |     |
| <b>Empagliflozin</b>           | 108.61                  | 1.29  | +   |     |
| <b>Finafloxacin</b>            | 107.59                  | 0.82  | +   |     |
| <b>Flibanserin</b>             | 44.27                   | 3.56  | +   | +   |
| <b>Ibrutinib</b>               | 99.16                   | 3.84  | +   | +   |
| <b>Idelalisib</b>              | 101.38                  | 3.66  | +   |     |
| <b>Ivabradine</b>              | 60.47                   | 2.93  | +   | +   |
| <b>Ivacaftor</b>               | 82.19                   | 4.89  | +   |     |
| <b>Ledipasvir</b>              | 174.64                  | 7.87  | +   |     |
| <b>Lenvatinib</b>              | 96.3                    | 4.26  | +   |     |
| <b>Lumacaftor</b>              | 97.75                   | 5.33  | +   |     |
| <b>Metformin</b>               | 88.99                   | -1.03 | +   |     |
| <b>Naloxegol</b>               | 126.77                  | 1.48  | +   |     |
| <b>Netupitant</b>              | 39.68                   | 6.79  | +   | +   |
| <b>Nintedanib</b>              | 97.71                   | 2.93  | +   |     |
| <b>Olaparib</b>                | 86.63                   | 2.36  | +   |     |
| <b>Olodaterol</b>              | 103.54                  | 2.32  | -   |     |
| <b>Oritavancin<sup>a</sup></b> | 560.98                  | 0.82  | -   |     |
| <b>Palbociclib</b>             | 105.04                  | 2.2   | +   |     |
| <b>Palonosetron</b>            | 23.55                   | 1.89  | +   | +   |
| <b>Panobinostat</b>            | 77.15                   | 3.07  | +   | +   |
| <b>Peramivir</b>               | 151.03                  | -0.35 | -   |     |
| <b>Pirfenidone</b>             | 22                      | 2.15  | +   | +   |
| <b>Rolapitant</b>              | 50.36                   | 5.39  | +   |     |
| <b>Sofosbuvir</b>              | 167.99                  | 1.75  | +   |     |
| <b>Sonidegib</b>               | 63.69                   | 4.86  | +   | +   |
| <b>Suvorexant</b>              | 80.29                   | 3.35  | +   | +   |
| <b>Tasimelteon</b>             | 38.33                   | 2.25  | +   | +   |
| <b>Tavaborolole</b>            | 29.46                   | -0.66 | -   |     |
| <b>Valsartan</b>               | 112.07                  | 4.01  | +   |     |
| <b>Vorapaxar</b>               | 81.01                   | 5.83  | +   |     |

<sup>a</sup>Cangrelor, Ceftazidime and Oritavancin are outside the range of the plot in Figure 2a.



### Data S1. Optimization of the HIA ellipse (normalized).

The final ellipse in the referential of tPSA and WLOGP (normalized towards standard deviation) able to discriminate best the 93 poorly from the 567 well-absorbed molecules as defined in the HIA-dataset (Table S1) was determined by Monte-Carlo optimization (MC) of five parameters: the Cartesian coordinates of both foci ( $x_1, x_2$ ); ( $y_1, y_2$ ) and the major axis (or largest diameter,  $d$ ). By geometrical definition, the sum of distances from every point on the ellipse's trace to each focus is equal to  $d$ .

About 10,000 5-dimensions starting vectors of ( $x_1, y_1, x_2, y_2, d$ ) were submitted to 10 independent runs of 100,000-step MC, involving a Metropolis-like criterion (refer to Methods S6).

The best ellipse was optimized (with a small constraint on the surface) until reaching the following parameters (in the normalized referential):

$x_1$ : 0.711 ;  $y_1$ : 2.736 (focus 1)

$x_2$ : 1.405 ;  $y_2$ : -0.720 (focus 2)

$d$ : 4.052

The classification power is:

TP<sup>a</sup> = 547

TN<sup>b</sup> = 67

FP<sup>c</sup> = 26

FN<sup>d</sup> = 20

MCC<sup>e</sup> = 0.7047

ACC<sup>f</sup> = 0.9303

Refer to Figure S1 for the HIA ellipse further described and depicted in the actual (denormalized) tPSA *versus* WLOGP referential.

---

<sup>a</sup>true positives; <sup>b</sup>true negatives; <sup>c</sup>false positives; <sup>d</sup>false negatives; <sup>e</sup>Matthews correlation coefficient; <sup>f</sup>accuracy

### Data S2. Optimization of the BBB ellipse (normalized).

The final ellipse in the referential of tPSA and WLOGP (normalized towards standard deviation) able to discriminate best the 104 brain non-penetrant from the 156 brain penetrant molecules as defined in the BBB-dataset (Table S2) was determined by MC of five parameters: the Cartesian coordinates of both foci ( $x_1, x_2$ ); ( $y_1, y_2$ ) and the major axis (or largest diameter,  $d$ ). By geometrical definition, the sum of distances from every point on the ellipse's trace to each focus is equal to  $d$ .

By geometrical definition, the sum of distances from every point on the ellipse's trace to each focus is equal to  $d$ .

About 10,000 5-dimensions starting vectors of ( $x_1, y_1, x_2, y_2, d$ ) were submitted to 10 independent runs of 100,000-step MC, involving a Metropolis-like criterion (refer to Methods S6).

The best ellipse was optimized (with a small constraint on the surface) until reaching the following parameters (in the normalized referential):

$x_1$ : 0.978 ;  $y_1$ : 3.261 (focus 1)

$x_2$ : 1.098;  $y_2$ : 0.664 (focus 2)

$d$ : 3.428

The classification power is:

TP<sup>a</sup> = 151

TN<sup>b</sup> = 82

FP<sup>c</sup> = 22

FN<sup>d</sup> = 5

MCC<sup>e</sup> = 0.7853

ACC<sup>f</sup> = 0.8962

Refer to Figure S2 for the BBB ellipse further described and depicted in the actual (denormalized) tPSA *versus* WLOGP referential.

---

<sup>a</sup>true positives; <sup>b</sup>true negatives; <sup>c</sup>false positives; <sup>d</sup>false negatives; <sup>e</sup>Matthews correlation coefficient; <sup>f</sup>accuracy

**Data S3 (separated Excel file). Cartesian coordinates of the BOILED-Egg's ellipse traces.** Hundred points of the HIA and BBB traces are connected to depict both ellipses. The user of the Excel spreadsheet have the possibility to enter WLOGP and tPSA values for up to 100 molecules and the corresponding points will be mapped onto the plot.

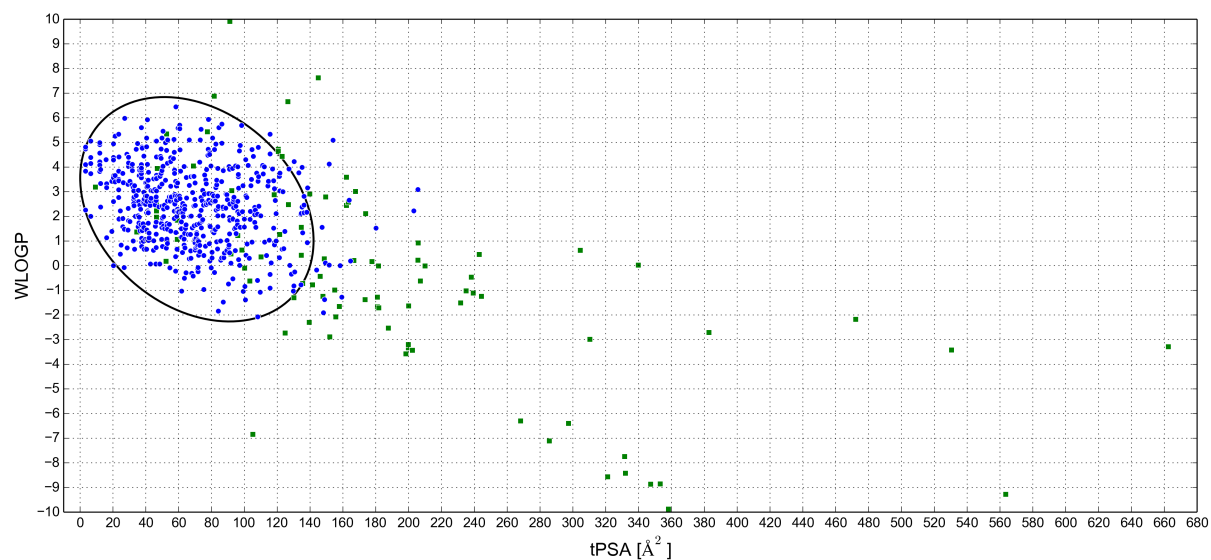

**Figure S1. Description of the denormalized HIA ellipse.**

The final (denormalized) model allowing for the best classification of 567 well-absorbed (HIA+, blue dots) and 93 poorly absorbed (HIA-, green squares) molecules is depicted as a black ellipse: center at (71.051; 2.292); length of major axis = 142.081; length of minor axis = 8.740 ; angle:  $-1.031325^\circ$ . Inside the ellipse, tPSA ranges between 0.0 and 142.1 Å<sup>2</sup> and WLOGP between -2.3 and 6.8.

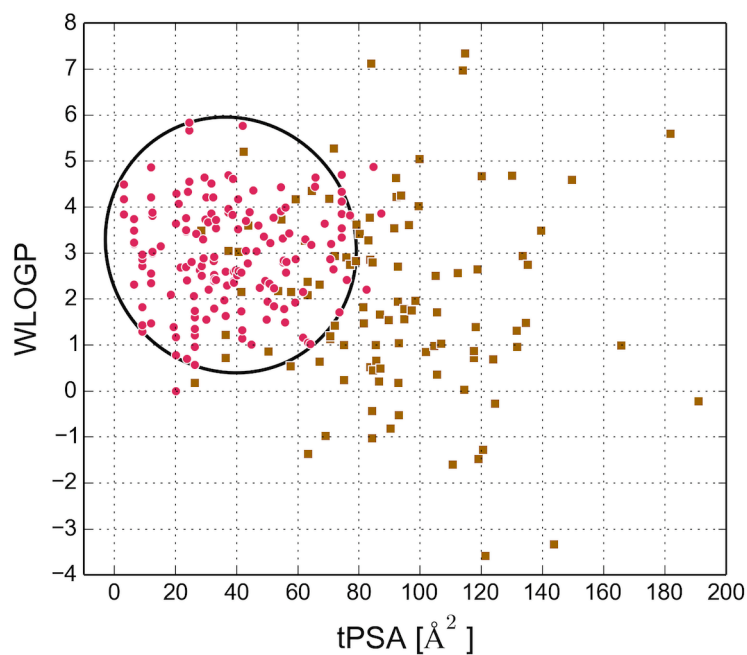

**Figure S2. Description of the denormalized BBB ellipse.**

The final (denormalized) model allowing for the best classification of 156 permeant (BBB+, pink dots) and 104 non-permeant (BBB-, brown squares) molecules is depicted as a black ellipse: center at (38.117; 3.177); length of major axis = 82.061; length of minor axis = 5.557 ; angle:  $-0.171887^\circ$ . Inside the ellipse, tPSA ranges between  $-2.9$  and  $79.1 \text{ \AA}^2$  and WLOGP between  $0.4$  and  $6.0$ .

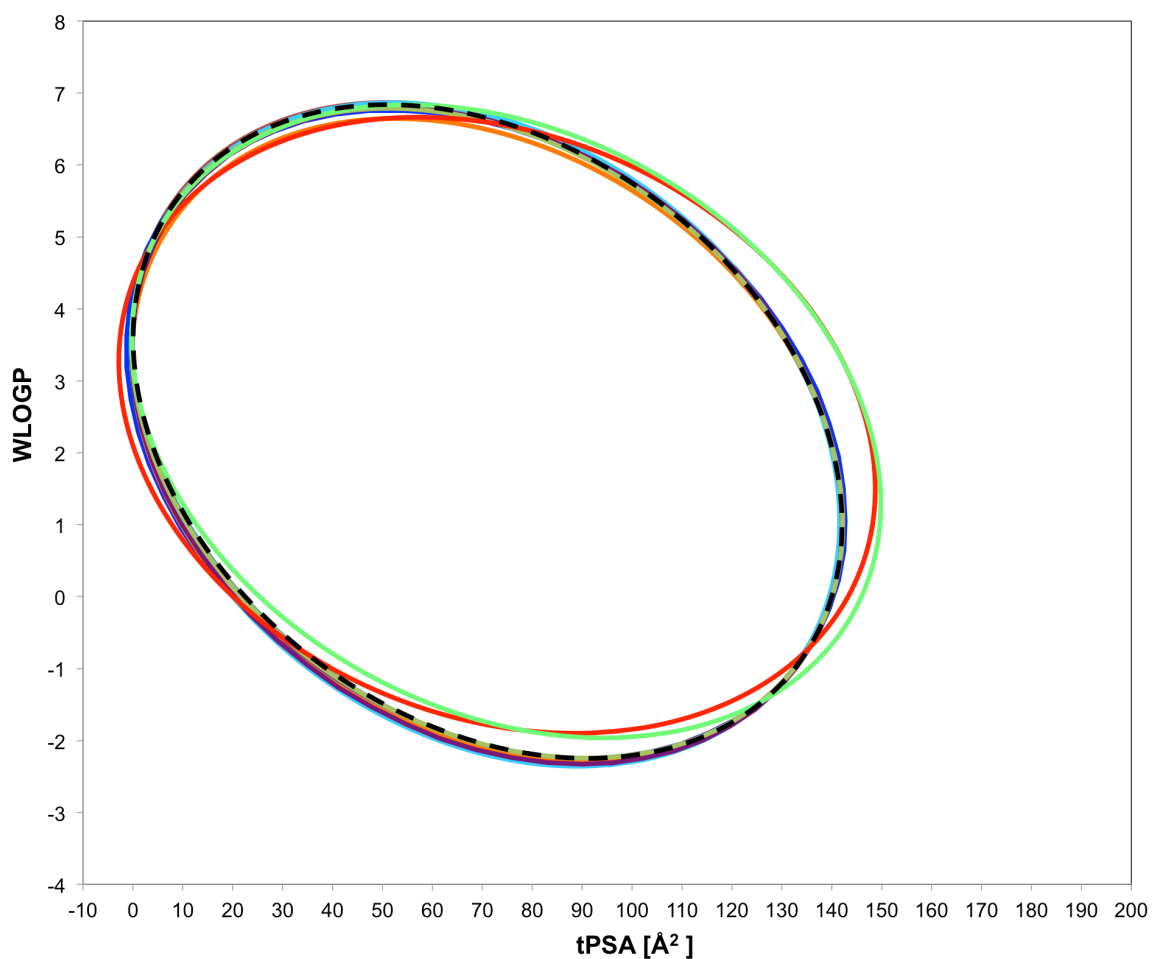

**Figure S3. 10-fold cross-validation for the HIA ellipse.**

The HIA model is depicted as a dashed black ellipse. The colored lines are the models built from each of the ten cross-validation training sets (refer to Methods S8 and Table S3). The variation is  $2.73 \text{ \AA}^2$  on the lower tPSA;  $8.26 \text{ \AA}^2$  on the upper tPSA and  $0.46$  for the lower WLOGP;  $0.20$  for the upper WLOGP.

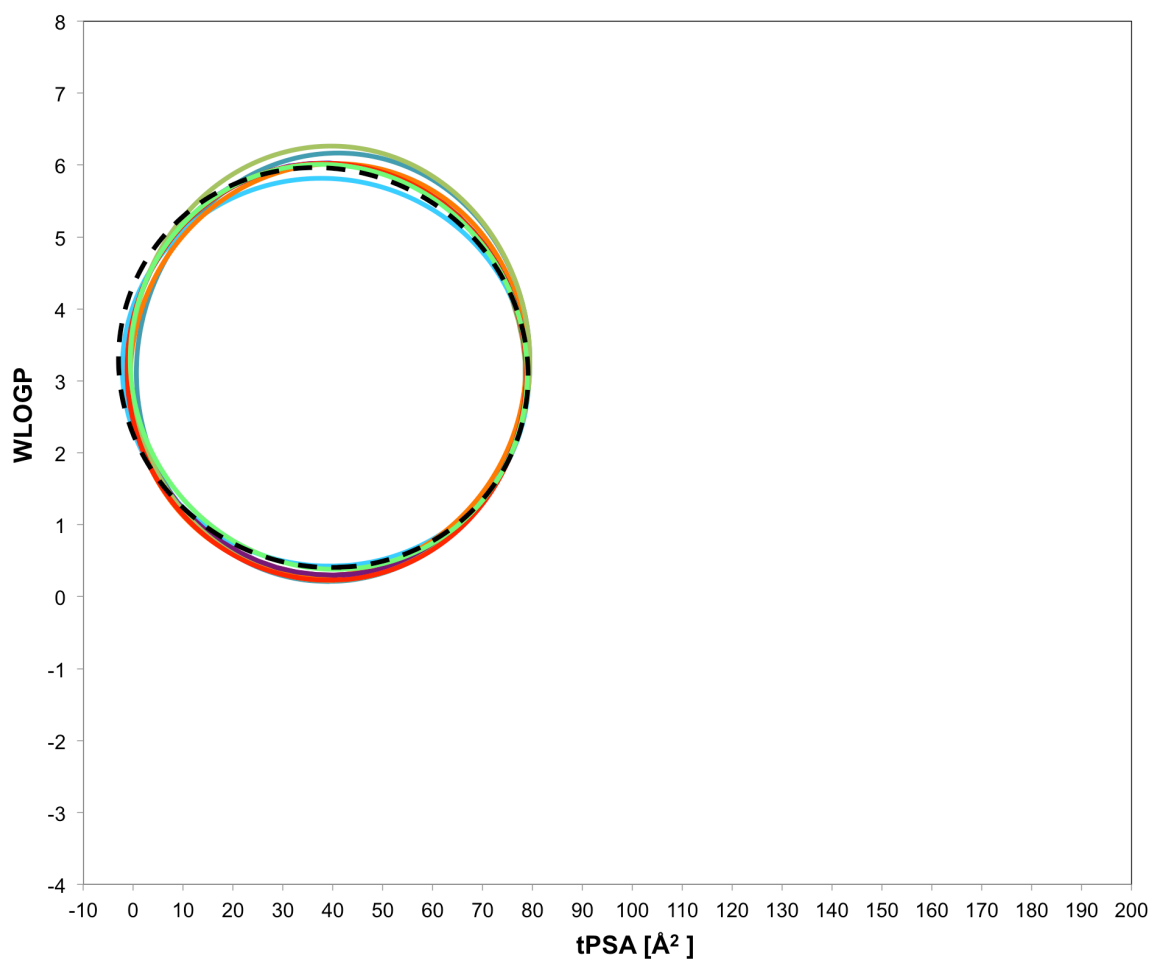

**Figure S4. 10-fold cross-validation for the BBB ellipse.**

The BBB model is depicted as a dashed black ellipse. The colored lines are the models built from each of the ten cross-validation training sets (refer to Methods S8 and Table S4). The variation is  $2.84 \text{ \AA}^2$  on the lower tPSA;  $0.91 \text{ \AA}^2$  on the upper tPSA and  $0.21$  for the lower WLOGP;  $0.50$  for the upper WLOGP.

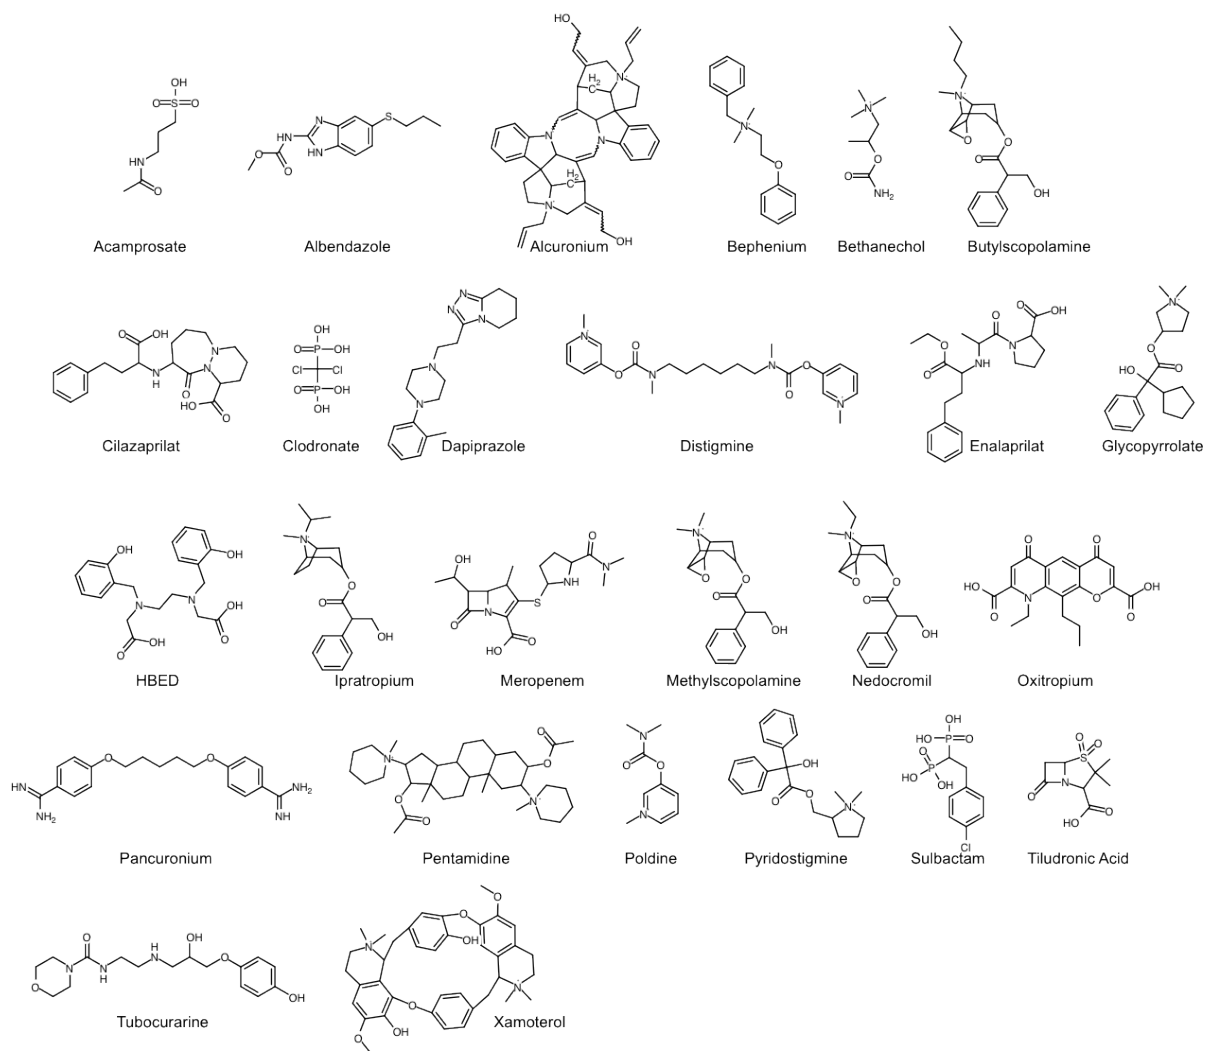

**Figure S5. HIA-dataset false positives (FP, 26 molecules).**



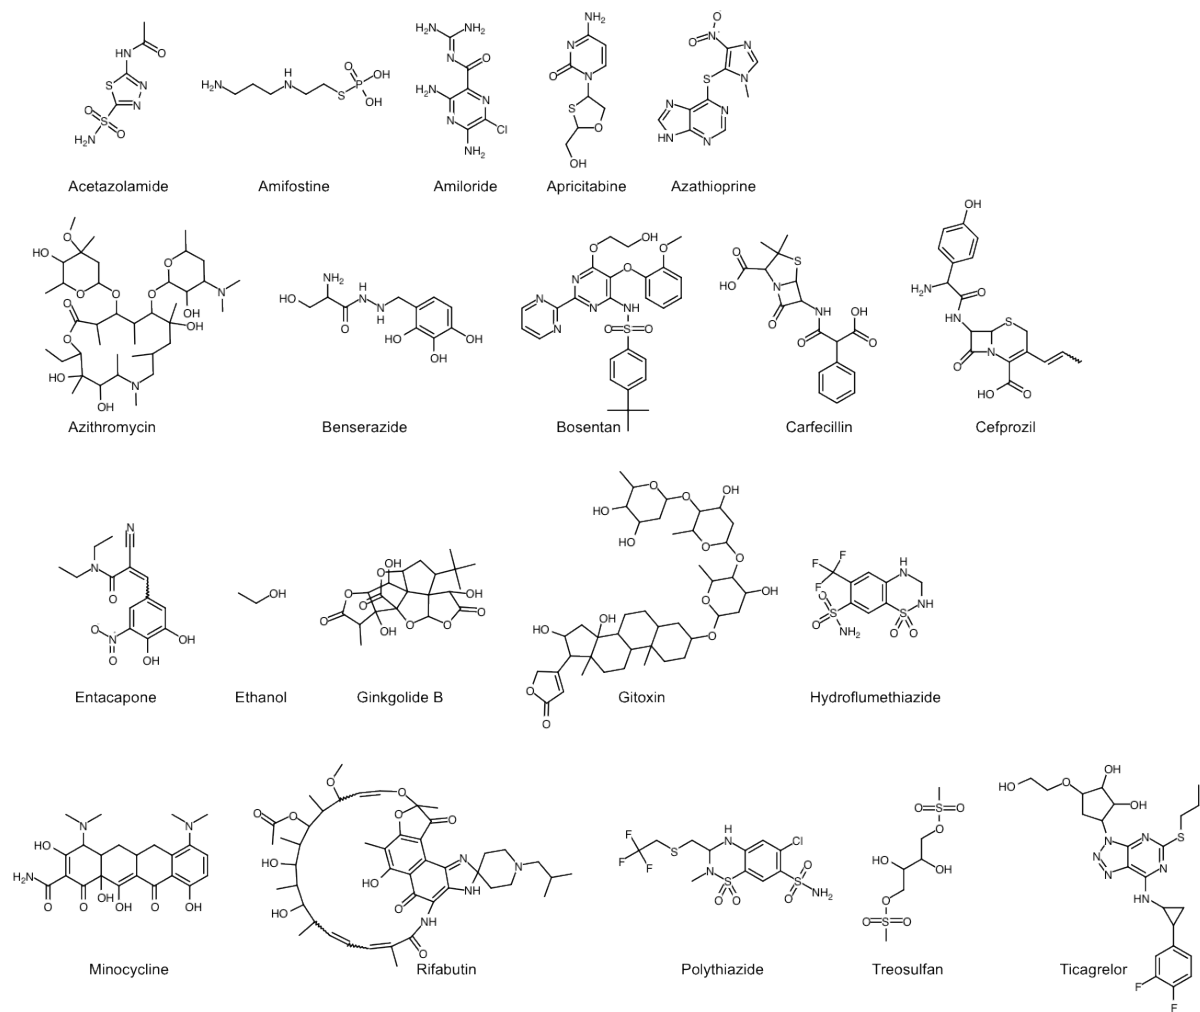

**Figure S6. HIA-dataset false negatives (FN, 20 molecules).**

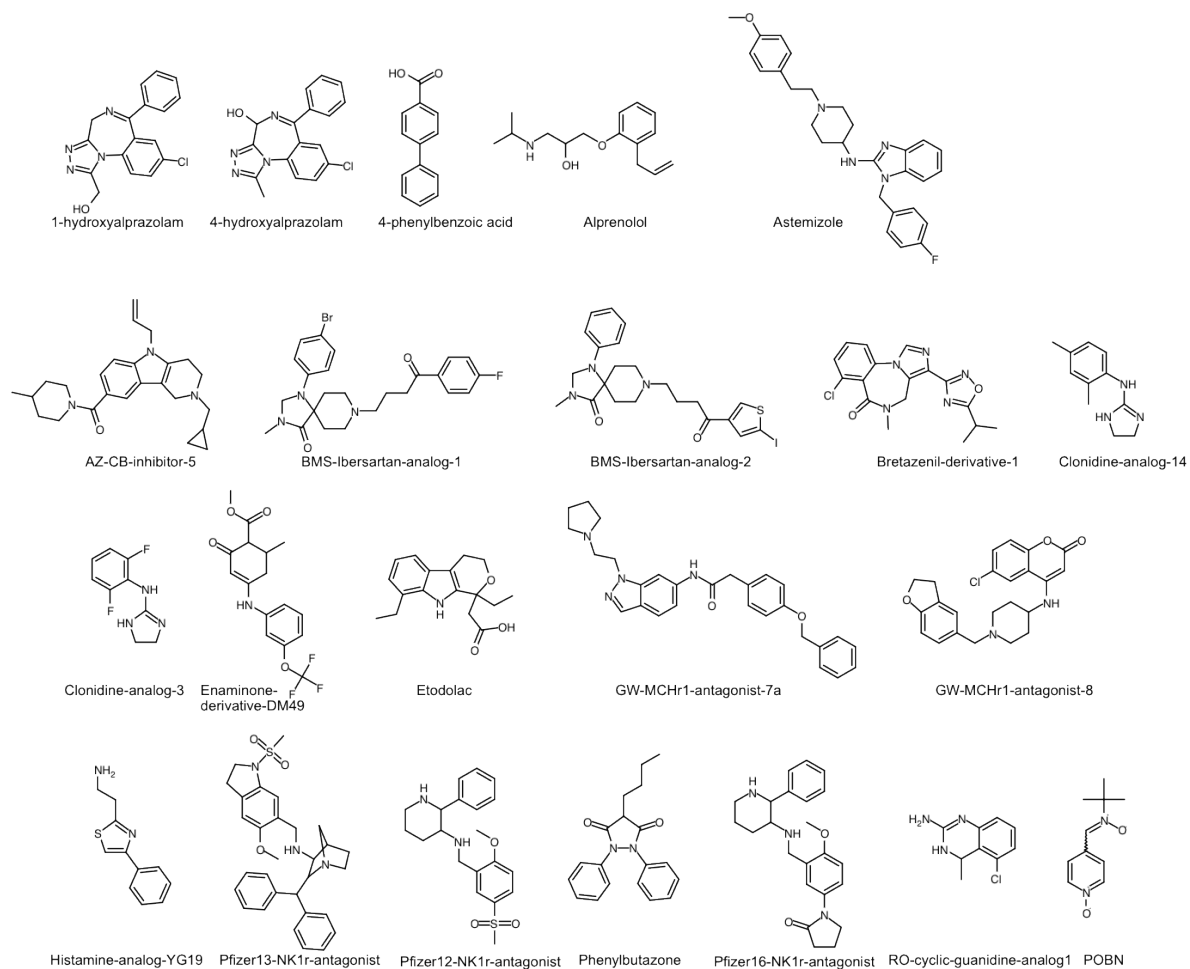

**Figure S7. BBB-dataset false positives (FP, 22 molecules).**

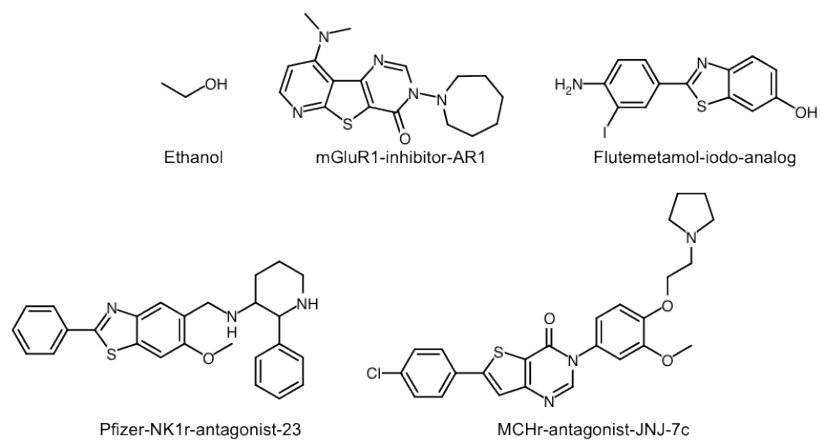

**Figure S8. BBB-dataset false negatives (FP, 5 molecules).**

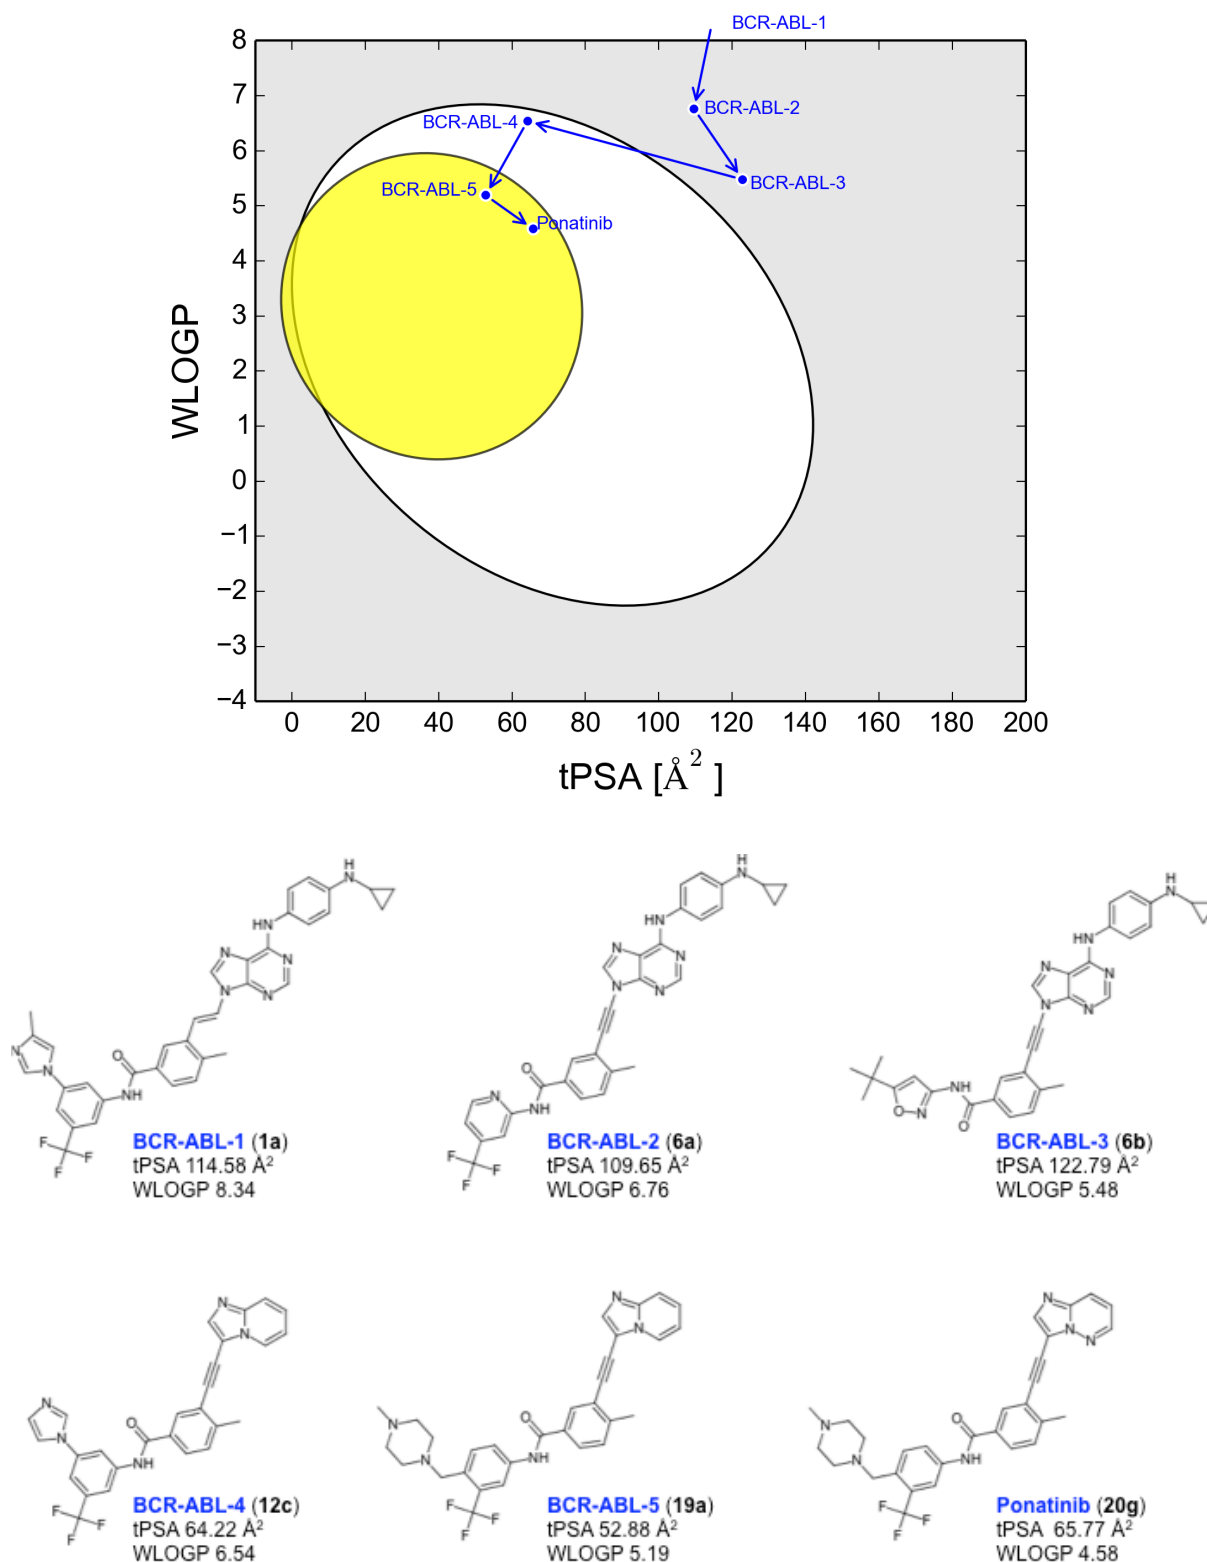

**Figure S9. Optimization of BCR-ABL inhibitors** resulting in the oral anti-cancer drug ponatinib. The medicinal chemistry path shows how to evolve from non-bioavailable leads (BCR-ABL-1, BCR-ABL-2, BCR-ABL-3) to well-absorbed and orally bioavailable drug-candidates (BCR-ABL-1, BCR-ABL-2) and finally develop a potent oral drug (ponatinib, Iclusig®). Molecular structures and identification numbers in brackets are taken from ref<sup>[15]</sup>.

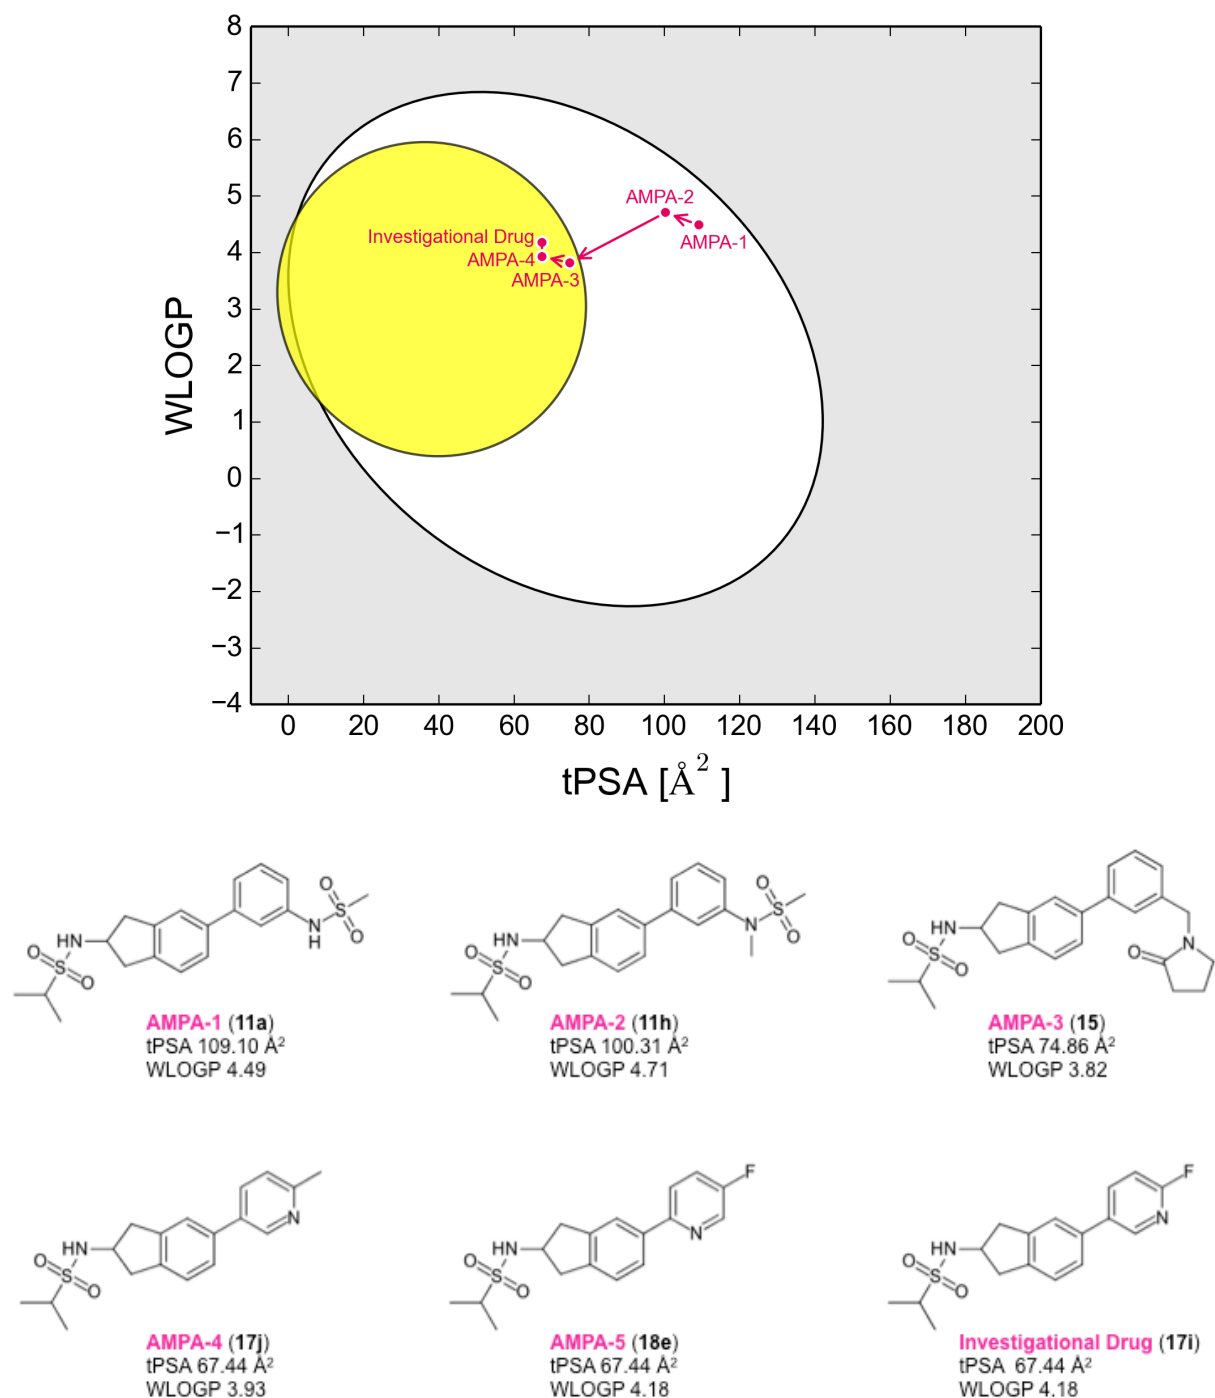

**Figure S10. Optimization of AMPA receptor modulators** resulting in an investigational drug promoted in clinical tests. The medicinal chemistry path shows how to evolve from BBB non-permeant leads (AMPA-1, AMPA-2, AMPA-3) to optimized compounds with high CNS levels (AMPA-4, AMPA-5) and finally develop a potent investigational drug accessing the brain (Investigational Drug). Molecular structures and identification numbers in brackets are taken from ref<sup>[16]</sup>.

## Supporting References

- [1] D. Newby, A. A. Freitas, T. Ghafourian, *Eur. J. Med. Chem.* **2015**, *90*, 751–765.
- [2] L. Mak, D. Marcus, A. Howlett, G. Yarova, G. Duchateau, W. Klaffke, A. Bender, R. C. Glen, *J. Cheminform.* **2015**, *7*, 31.
- [3] K. M. Morrissey, C. C. Wen, S. J. Johns, L. Zhang, S.-M. Huang, K. M. Giacomini, *Clin. Pharmacol. Ther.* **2012**, *92*, 545–546.
- [4] M. Zhao, Y. Chen, D. Qu, H. Qu, *Sci. China Life Sci.* **2011**, *54*, 60–64.
- [5] V. Law, C. Knox, Y. Djoumbou, T. Jewison, A. C. Guo, Y. Liu, A. Maciejewski, D. Arndt, M. Wilson, V. Neveu, et al., *Nucleic Acids Res.* **2013**, *42*, D1091–D1097.
- [6] A. P. Bento, A. Gaulton, A. Hersey, L. J. Bellis, J. Chambers, M. Davies, F. A. Krüger, Y. Light, L. Mak, S. McGlinchey, et al., *Nucleic Acids Res.* **2014**, *42*, D1083–90.
- [7] D. Weininger, *J. Chem. Inf. Model.* **1988**, *28*, 31–36.
- [8] Y. Brito-Sánchez, Y. Marrero-Ponce, S. J. Barigye, I. Yaber-Goenaga, C. Morell Pérez, H. Le-Thi-Thu, A. Cherkasov, *Mol. Inf.* **2015**, *34*, 308–330.
- [9] S. A. Wildman, G. M. Crippen, *J. Chem. Inf. Model.* **1999**, *39*, 868–873.
- [10] A. K. Ghose, V. N. Viswanadhan, J. J. Wendoloski, *J Comb Chem* **1999**, *1*, 55–68.
- [11] N. M. O'Boyle, M. Banck, C. A. James, C. Morley, T. Vandermeersch, G. R. Hutchison, *J. Cheminform.* **2011**, *3*, 33.
- [12] P. Ertl, B. Rohde, P. Selzer, *J. Med. Chem.* **2000**, *43*, 3714–3717.
- [13] N. Metropolis, S. Ulam, *JASA* **1949**, *44*, 335–341.
- [14] A. Daina, O. Michielin, V. Zoete, *J. Chem. Inf. Model.* **2014**, *54*, 3284–3301.
- [15] W.-S. Huang, C. A. Metcalf, R. Sundaramoorthi, Y. Wang, D. Zou, R. M. Thomas, X. Zhu, L. Cai, D. Wen, S. Liu, et al., *J. Med. Chem.* **2010**, *53*, 4701–4719.
- [16] S. E. Ward, M. Harries, L. Aldegheri, D. Andreotti, S. Ballantine, B. D. Bax, A. J. Harris, A. J. Harker, J. Lund, R. Melarange, et al., *J. Med. Chem.* **2010**, *53*, 5801–5812.
